# Supplementary material for: Is an ounce of prevention worth a pound of cure? A cross-sectional study of the impact of English public health grant on mortality and morbidity
Source: PubMed Central journal article supplement — BMJ Open. 2020 Oct 10;10(10):e036411. doi: 10.1136/bmjopen-2019-036411 (PMC7549458; doi:10.1136/bmjopen-2019-036411), 2020-10-10
Supplement: bmjopen-2019-036411.draft_revisions.pdf [file bmjopen-2019-036411.draft_revisions.pdf]

# BMJ Open

BMJ Open is committed to open peer review. As part of this commitment we make the peer review history of every article we publish publicly available.

When an article is published we post the peer reviewers' comments and the authors' responses online. We also post the versions of the paper that were used during peer review. These are the versions that the peer review comments apply to.

The versions of the paper that follow are the versions that were submitted during the peer review process. They are not the versions of record or the final published versions. They should not be cited or distributed as the published version of this manuscript.

BMJ Open is an open access journal and the full, final, typeset and author-corrected version of record of the manuscript is available on our site with no access controls, subscription charges or pay-per-view fees (<http://bmjopen.bmj.com>).

If you have any questions on BMJ Open's open peer review process please email [info.bmjopen@bmj.com](mailto:info.bmjopen@bmj.com)

# BMJ Open

**Is an ounce of prevention worth a pound of cure?  
Estimates of the impact of English public health grant on  
mortality and morbidity.**

|                               |                                                                                                                                                                                        |
|-------------------------------|----------------------------------------------------------------------------------------------------------------------------------------------------------------------------------------|
| Journal:                      | <i>BMJ Open</i>                                                                                                                                                                        |
| Manuscript ID                 | bmjopen-2019-036411                                                                                                                                                                    |
| Article Type:                 | Original research                                                                                                                                                                      |
| Date Submitted by the Author: | 16-Dec-2019                                                                                                                                                                            |
| Complete List of Authors:     | Martin, Stephen; University of York Department of Economics and Related Studies,<br>Lomas, James; University of York, Centre for Health Economics<br>Claxton, Karl; University of York |
| Keywords:                     | PUBLIC HEALTH, HEALTH ECONOMICS, Health policy < HEALTH SERVICES ADMINISTRATION & MANAGEMENT                                                                                           |
|                               |                                                                                                                                                                                        |

SCHOLARONE™  
Manuscripts

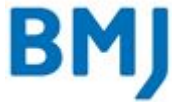

I, the Submitting Author has the right to grant and does grant on behalf of all authors of the Work (as defined in the below author licence), an exclusive licence and/or a non-exclusive licence for contributions from authors who are: i) UK Crown employees; ii) where BMJ has agreed a CC-BY licence shall apply, and/or iii) in accordance with the terms applicable for US Federal Government officers or employees acting as part of their official duties; on a worldwide, perpetual, irrevocable, royalty-free basis to BMJ Publishing Group Ltd ("BMJ") its licensees and where the relevant Journal is co-owned by BMJ to the co-owners of the Journal, to publish the Work in this journal and any other BMJ products and to exploit all rights, as set out in our [licence](#).

The Submitting Author accepts and understands that any supply made under these terms is made by BMJ to the Submitting Author unless you are acting as an employee on behalf of your employer or a postgraduate student of an affiliated institution which is paying any applicable article publishing charge ("APC") for Open Access articles. Where the Submitting Author wishes to make the Work available on an Open Access basis (and intends to pay the relevant APC), the terms of reuse of such Open Access shall be governed by a Creative Commons licence – details of these licences and which [Creative Commons](#) licence will apply to this Work are set out in our licence referred to above.

Other than as permitted in any relevant BMJ Author's Self Archiving Policies, I confirm this Work has not been accepted for publication elsewhere, is not being considered for publication elsewhere and does not duplicate material already published. I confirm all authors consent to publication of this Work and authorise the granting of this licence.

1  
2  
3 **Is an ounce of prevention worth a pound of cure?**  
4 **Estimates of the impact of English public health grant on**  
5 **mortality and morbidity**  
6  
7  
8  
9

10 Author/position/address

11 Dr Stephen Martin

12 Research Fellow, Department of Economics, University of York, York, YO10 5DD.  
13  
14

15 Dr James Lomas

16 Research Fellow, Centre for Health Economics, University of York, York, YO10 5DD.  
17  
18

19 Karl Claxton

20 Professor, Department of Economics & Centre for Health Economics, University of York,  
21 York, YO10 5DD.  
22  
23  
24

25 Corresponding author and email address

26 Dr Stephen Martin Email: [sdm1@york.ac.uk](mailto:sdm1@york.ac.uk)  
27  
28

29 Copyright statement

30 The Corresponding Author has the right to grant on behalf of all authors and does grant on  
31 behalf of all authors, an exclusive licence (or non exclusive for government employees) on a  
32 worldwide basis to the BMJ Publishing Group Ltd to permit this article (if accepted) to be  
33 published in BMJ editions and any other BMJ PGL products and sublicences such use and  
34 exploit all subsidiary rights, as set out in our licence.  
35  
36  
37

38 Competing interest statement

39 All authors have completed the Unified Competing Interest form (available on request from  
40 the corresponding author) and declare: financial support from the National Institute for  
41 Health Research Policy Research Programme for the submitted work; no financial  
42 relationships with any organisations that might have an interest in the submitted work in the  
43 previous three years; and no other relationships or activities that could appear to have  
44 influenced the submitted work.  
45  
46  
47  
48

49 Contributors

50 All authors contributed to the concept and design of this paper. SM led on the analysis and  
51 drafting, and the final paper was edited and approved by all three authors. The corresponding  
52 author attests that all listed authors meet authorship criteria and that no others meeting these  
53 criteria have been omitted. SM is the paper's guarantor.  
54  
55  
56  
57  
58  
59  
60

### Transparency declaration

The lead author (the manuscript's guarantor) affirms that the manuscript is an honest, accurate, and transparent account of the study being reported; that no important aspects of the study have been omitted; and that any discrepancies from the study as planned have been explained.

### Details of ethical approval

Ethical approval was not required.

### Details of funding

This paper reports independent research funded by the National Institute for Health Research Policy Research Programme (NIHR PRP) through its Policy Research Unit in Economic Evaluation of Health & Care Interventions (EEPRU, grant reference 104/0001).

### Details of the role of the study sponsors

The views expressed in this publication are those of the authors and not necessarily those of the NHS, the National Institute for Health Research or the Department of Health and Social Care (DHSC).

### Statement of independence of researchers from funders

Although funded by the DHSC, the Department had no influence on the study design, the way in which the research was undertaken, or the results.

### Patient and public involvement statement

Patients or the public were not involved in the design, or conduct, or reporting, or dissemination of our research.

### Acknowledgements

We should like to thank NHS Digital for supplying the mortality data. We should also like to acknowledge the assistance received from various individuals including Michael Chaplin at the Department of Health and Professor Brian Ferguson and Scott Mahony at Public Health England. Finally, we should like to acknowledge the comments received from various individuals at the Department of Health and Social Care on an earlier version of this paper. Their suggestions have substantially improved the final version.

### Data sharing statement

All data are in the public domain.

### Word count

The text consists of 4,470 words. There are three tables and one figure in a separate file.

1  
2  
3 **Is an ounce of prevention worth a pound of cure?**  
4 **Estimates of the impact of English public health grant on**  
5 **mortality and morbidity**  
6  
7  
8

9 Abstract  
10

11 *Objectives*

12 The UK government is proposing to cease cutting the local authority public health grant by  
13 re-allocating part of the treatment budget to preventative activity. This study examines  
14 whether this proposal is evidenced-based and, in particular, whether these resources are best  
15 re-allocated to prevention, or whether this expenditure would generate more health gains if  
16 used for treatment.  
17  
18  
19

20  
21 *Methods*

22 Instrumental variable regression methods are applied to English local authority data on  
23 mortality, healthcare and public health expenditure to estimate the responsiveness of  
24 mortality to changes in healthcare and public health expenditure in 2013/14. Using a well-  
25 established method, these mortality results are converted to a quality-adjusted life year  
26 (QALY) basis, and this facilitates the estimation of the cost per QALY for both National  
27 Health Service (NHS) healthcare and local public health expenditure.  
28  
29  
30

31  
32 *Results*

33 Saving lives and improving the quality of life requires resources. Our estimates suggest that  
34 each additional quality-adjusted life year (QALY) costs about £3,800 from the local public  
35 health budget, and that each additional QALY from the NHS budget costs about £13,500.  
36 These estimates can be used to calculate the number of QALYs generated by a budget boost.  
37 If we err on the side of caution and use the most conservative estimates that we have, then an  
38 additional £1bn spent on public health will generate 206,398 QALYs (95% CI 33,128 to  
39 379,702 QALYs), and an additional £1bn spent on healthcare will generate 67,018 QALYs  
40 (95% CI 20,544 to 113,491 QALYs).  
41  
42  
43  
44

45 *Conclusions*

46 Additional public health expenditure is very productive of health and is more productive than  
47 additional NHS expenditure. However, both types of expenditure are more productive of  
48 health than the norms used by NICE (£30,000 per QALY) to judge whether new therapeutic  
49 technologies are suitable for adoption by the NHS.  
50  
51  
52  
53  
54  
55  
56  
57  
58  
59  
60

1  
2  
3 Strengths and limitations of this study  
4

- 5
- 6 • Cross-sectional analysis of the impact of public health and healthcare expenditure on mortality.
  - 7
  - 8 • The endogenous nature of expenditure is accommodated via the use of instrumental variable methods.
  - 9
  - 10 • The analysis includes potential effect modifiers and mediating factors.
  - 11
  - 12 • The estimated mortality effects are converted into quality-adjusted life year effects.
  - 13
  - 14 • There may be other mediating factors beyond those included in this study.
  - 15
  - 16
  - 17
  - 18
  - 19
  - 20
  - 21
  - 22
  - 23
  - 24
  - 25
  - 26
  - 27
  - 28
  - 29
  - 30
  - 31
  - 32
  - 33
  - 34
  - 35
  - 36
  - 37
  - 38
  - 39
  - 40
  - 41
  - 42
  - 43
  - 44
  - 45
  - 46
  - 47
  - 48
  - 49
  - 50
  - 51
  - 52
  - 53
  - 54
  - 55
  - 56
  - 57
  - 58
  - 59
  - 60

For peer review only

# Is an ounce of prevention worth a pound of cure?

## Estimates of the impact of English public health grant on mortality and morbidity

### 1. Introduction

The UK's NHS spends about 5% of its annual budget on preventative activity with most of the remainder on treatment.<sup>1</sup> However, most observers agree that prevention is better than cure and two recent government publications emphasise the importance of prevention if the government's target gains in life expectancy by 2035 are to be realised.<sup>2,3,4</sup> The government's 2019 Spending Review announced that cuts to the public health grant will cease and that a real-terms increase from 2019/20 to 2020/21 will be achieved by a reprioritisation within the Department of Health's budget.<sup>5,6</sup> Although there is some debate about whether the increased funding will even compensate for increased costs,<sup>7</sup> this reprioritisation raises the issue of whether these resources are best re-allocated to prevention, or whether this expenditure would generate more health gains if used for treatment.

There is considerable evidence that specific individual preventative interventions generate substantial health benefits. For example, a study of the cost per quality adjusted life year (QALY) associated with public health interventions assessed by the National Institute for Health and Care Excellence (NICE) over two five-year periods reported that the median cost per QALY was £1,053 between 2005 and 2010, and £7,843 between 2011 and 2016.<sup>8</sup> Both of these cost per QALY figures are far below the £30,000 threshold that NICE uses for the approval of new therapeutic treatments within the NHS.<sup>9</sup>

Studies of individual public health interventions are useful but, if budgets are re-allocated, we need to know the health gains associated with the increased spending on public health across *all* types of investments and the health losses associated with reduced spending on treatment (again, across *all* programmes that are likely to be curtailed). In other words, we need to know the health effects at the margin of changes in the totality of the public health and healthcare budgets.

There is some American evidence on the effect of public health expenditure on mortality but the relevance of this for the UK is limited because the US healthcare system is very different and these studies do not simultaneously account for the impact of treatment expenditure.<sup>10</sup>



1  
2  
3 There is considerable evidence about the marginal productivity of English NHS healthcare  
4 (treatment) expenditure.<sup>11 12</sup> However, we want to investigate the marginal productivity of  
5 preventative expenditure while simultaneously controlling for treatment expenditure, and the  
6 inclusion of prevention expenditure in the health outcome specification may affect the  
7 estimated marginal productivity of treatment expenditure.  
8  
9  
10  
11  
12

13 Here we exploit the availability of a funding formula for the public health grant. This  
14 determines how much of the total national budget is allocated to each local authority. Some  
15 components of this formula are exogenous, i.e., they are not related to health outcomes except  
16 through their influence on the level of expenditure, and this makes it possible to identify the  
17 causal effect of changes in expenditure on mortality.  
18  
19  
20  
21  
22  
23

24 At the time of this study, the most recent mortality data available at a local level was for  
25 2013/2014/2015 combined, and hence we relate expenditure in 2013/14 to a measure of  
26 mortality for these three years. Moreover, by converting healthcare (treatment) expenditure  
27 as reported by Clinical Commissioning Groups (CCGs) to a local authority geography, we are  
28 also able to estimate a health outcome specification that includes both treatment (healthcare)  
29 and prevention (public health) expenditure. This enables us to identify the relative  
30 contribution of both types of expenditure to reductions in mortality.  
31  
32  
33  
34  
35  
36  
37

## 38 **2. Methods**

### 39 ***2.1 Institutional context***

40 The English National Health Service (NHS) is a largely centrally planned and publicly  
41 funded health care system. Its income comes almost entirely from national taxation. Access  
42 to the Service is usually via general practitioners who act as gatekeepers to secondary care  
43 and pharmaceuticals. With some minor exceptions, the service is free at the point of  
44 consumption for patients.  
45  
46  
47  
48  
49  
50  
51

52 The Service is organized geographically, with responsibility for the local management of the  
53 NHS delegated to local health authorities. For our study year (2013/14), each authority  
54 (CCG) was assigned a fixed annual budget by the national ministry (the Department of  
55 Health) within which they were supposed to meet expenditure on most types of health care.  
56  
57  
58  
59  
60

1  
2  
3 We use their reported expenditure from the programme budgeting dataset as a measure of  
4 local healthcare expenditure.<sup>13</sup> Primary care, specialised commissioning and *national* public  
5 health programmes were administered centrally. £2,203m was made available for these  
6 nationally funded public health programmes including those for immunisation (eg for  
7 Hepatitis B, BCG, and MMR) and for screening (eg for exposure to HIV and for cervical  
8 cancer).<sup>14</sup>  
9  
10  
11  
12  
13  
14

15 Responsibility for *local* public health was delegated to local government with each ‘unitary’  
16 or upper tier authority receiving a fixed annual budget, ring-fenced for public health  
17 activities. Here, our focus is on the impact of the local public health grant because we do not  
18 have data for expenditure on national programmes by local area. In 2013/14 local authorities  
19 spent over £2,500m on public health services including £630m on sexual health services (eg  
20 for STI testing and treatment, and for contraception), £800m on substance (drugs and alcohol)  
21 misuse services, £150m on stop smoking and tobacco control services, and £240m on health  
22 programmes for children aged 5-19.<sup>15</sup>  
23  
24  
25  
26  
27  
28  
29

30 We sometimes refer to public health expenditure as ‘preventative’ and healthcare expenditure  
31 as ‘treatment’ (for ill-health). This is more out of a desire to avoid repetition rather than any  
32 belief that all expenditure funded by the public health grant is preventative and/or that all  
33 healthcare expenditure is solely for treatment. For example, some expenditure from the  
34 public health grant could be considered as treatment (eg expenditure on substance misuse  
35 treatment services) and some expenditure by CCGs will be preventative (eg on medication  
36 for blood pressure and blood cholesterol). This issue is discussed further in the online  
37 appendix (see section A1).  
38  
39  
40  
41  
42  
43  
44  
45

## 46 **2.2 Estimation strategy**

47 Studies estimating the relationship between any form of health expenditure and mortality  
48 typically estimate an outcome equation of the form:

$$49 \ln(\text{mortality rate}) = \ln(\text{health expenditure per person}) + \text{controls for need} + e \quad (1)$$

50 where expenditure is likely to be endogenous, the controls reflect the need for health  
51 expenditure, and *e* reflects everything not included elsewhere in the specification.<sup>16 17</sup> We  
52 want to estimate this specification, first with public health as the sole expenditure variable,  
53 and then with both public health and healthcare expenditure as two separate variables.  
54  
55  
56  
57  
58  
59  
60

1  
2  
3 One issue with the estimation of (1) is that actual observed expenditure might be in part  
4 determined by outcomes. To circumvent this potential endogeneity and permit a causal  
5 interpretation of the estimated effect of expenditure, we first predict expenditure using  
6 exogenous elements in the funding formula (instruments) and then consider the relationship  
7 between the predicted (exogenous) variation in expenditure and health outcomes.  
8  
9

10  
11  
12  
13 The resource allocation formula for the public health grant to local authorities has three  
14 components – for mandatory services, for non-mandatory services, and for substance misuse  
15 services – and each component has its own formula. Although the precise formula differs for  
16 each component, overall, the public health budget per person can be expressed as:  
17  
18

19 local budget per person = (national budget per person) x (local age index) x  
20  
21  
22 (local additional needs index) x (local input price index) x (local DFT Index) (2)  
23

24 where: (a) the age index reflects the demographic profile of the local population; (b) the  
25 additional needs index reflects local deprivation and other factors likely to influence the need  
26 for public health expenditure; (c) the input price index (MFF) reflects prices in the local  
27 health economy; and (d) the distance from target (DFT) index reflects how far each LA's  
28 actual budget allocation is from its target allocation.<sup>16</sup> The DFT index reflects the fact that,  
29 periodically, the national ministry revises the funding formula and this, together with routine  
30 data updates, generates a new target budget allocation for each LA. For some LAs, the new  
31 funding rule might generate a large change in its target allocation and, to avoid sudden large  
32 reductions in actual allocations (budgets), such changes are phased into actual budgets over a  
33 number of years in accordance with the Department of Health's 'pace of change' policy.<sup>18</sup>  
34  
35  
36  
37  
38  
39  
40  
41  
42

43 Two of the four adjustment factors in equation (2) – the MFF and the DFT – are relevant for  
44 all three components of the public health resource allocation formula for 2013/14. We use  
45 these variables as instruments to predict expenditure, and then consider the relationship  
46 between this predicted level of expenditure and health outcomes. The MFF and DFT are  
47 valid instruments if they are not related to health outcomes (except through their influence on  
48 expenditure) or an unobserved confounder.<sup>16 17</sup>  
49  
50  
51  
52  
53

54 The local input price index (MFF), which will reflect characteristics of the local (health)  
55 economy, could be correlated with unmeasured determinants of mortality (i.e., an unobserved  
56 confounder). However, we have over a dozen potential socio-economic covariates (including  
57 the Index of Multiple Deprivation) in the baseline mortality equation and hence it is difficult  
58  
59  
60

1  
2  
3 to imagine what effect the input price index would detect that our covariates do not (see  
4 online appendix A2 for further discussion of this instrument). The DFT variable will largely  
5 reflect: (i) the level of PCT expenditure in 2010/11 associated with those public health  
6 activities that were transferred to local authorities in 2013/14; (ii) the public health grant  
7 funding formula for 2013/14; and (iii) the ‘pace of change’ policy for the 2013/14 allocations.  
8 The latter two factors will be policy choices but it is not obvious that the resulting DFT will  
9 be endogenous with respect to mortality. Moreover, any correlation between our two  
10 instruments and the error term in equation (1) is likely to be detected by the Hansen-Sargan  
11 test. Hence we use the public health grant MFF and DFT as instruments for public health  
12 expenditure when estimating equation (1).  
13  
14  
15  
16  
17  
18  
19  
20  
21

22 Theory provides little guidance as to the identity of the appropriate controls in equation (1)  
23 so, following previous studies, we identify a dozen socio-economic variables -- such as the  
24 proportion of the working-age population employed in managerial and professional  
25 occupations, and the proportion of owner-occupied households – as potential controls for the  
26 need for public health expenditure.<sup>17</sup> We start by estimating (1) with all socio-economic  
27 variables included as controls. The least significant regressor is removed from the  
28 specification and the equation is re-estimated (backward selection). This process – of  
29 dropping the least significant regressor and re-estimating -- continues until there are only  
30 significant controls remaining (the expenditure term is forced to be ever-present). This  
31 specification becomes our preferred result if it also passes the appropriate statistical tests (eg  
32 the instruments are valid and the instruments are strong) but, if this is not the case, the  
33 specification is adjusted (eg an invalid instrument is removed) and the equation re-estimated.  
34 When the specification requires no further adjustment it becomes our preferred specification.  
35  
36  
37  
38  
39  
40  
41  
42  
43  
44  
45

46 Initially equation (1) is estimated using the above strategy with public health as the sole  
47 health expenditure variable. We then re-estimate (1) – again using the above strategy – but  
48 this time including healthcare expenditure as an additional endogenous regressor. This  
49 variable is instrumented in a similar way to public health. Further details of this estimation  
50 process and the instruments for healthcare expenditure are in the online appendix A3. As a  
51 sensitivity analysis, we repeat our estimation strategy using forward selection to identify  
52 relevant controls when we have both public health and healthcare expenditure in the health  
53 outcome equation.  
54  
55  
56  
57  
58  
59  
60

### 2.3 Data

Unitary and upper tier local authorities (n=152) are the unit of analysis in this study but one of them (the Isles of Scilly) is so small that the mortality data for this authority is rarely disclosed by the ONS so this leaves 151 authorities for analysis. In addition, the healthcare expenditure data for one CCG (Wiltshire) for 2013/14 is not available so that, when both expenditure variables are included in the estimating equation, there are 150 observations for analysis.

With the exception of the CCG healthcare expenditure and the instruments for this variable, all of the dataset is readily available at the local authority (LA) level. The healthcare expenditure and instrument data have been converted to a LA basis using a mapper which uses population levels in mid-2012 to allocate (parts of) CCGs to LAs. As LAs vary greatly in size, we weight all observations in our analysis by their population size. In addition, we use the logarithms of all variables in the empirical analysis so that regression coefficients can be interpreted as elasticities.

Table 1 reports descriptive statistics for the variables employed in this study. Average expenditure per person from the public health grant in 2013/14 was £53 and this varied between £18 and £186 per person. Average per capita expenditure on healthcare was £1,152. The mortality measure employed in this study is the (age) standardised under 75 years of life lost rate (SYLLR). The mortality data for 2013/14/15 combined is available via the NHS Digital Indicator portal at <https://indicators.hscic.gov.uk/webview/>. This mortality rate varies considerably across the country, ranging between 267 (City of London) and 776 (Blackpool) years of life lost per 10,000 population.

The DFT instrument for public health expenditure averages just over 1.00 but its range suggests that at least one LA budget is 46% under its target allocation and another LA budget (the City of London) is 562% above its target allocation. The MFF instrument for public health expenditure reveals that some LAs face unit costs between 8% lower and 21% higher than the average. The instruments for healthcare expenditure also reveal considerable geographic variation with, for example, some LAs being 7% below and others being 23% above their target allocations.

Table 1 Descriptive statistics for study variables

| Variable description                                                             | Observations | Mean    | Std. Dev. | Minimum | Maximum |
|----------------------------------------------------------------------------------|--------------|---------|-----------|---------|---------|
| <i>Health expenditure variables</i>                                              |              |         |           |         |         |
| Public health grant: expenditure per person, £, 2013/14                          | 152          | 52.6    | 25.2      | 18.5    | 186.2   |
| Healthcare spend per person, £, 2013/14                                          | 151          | 1152.1  | 75.8      | 1019.9  | 1479.1  |
| <i>Mortality variable</i>                                                        |              |         |           |         |         |
| Standardised years of life lost rate, 2013/14/15                                 | 151          | 443.3   | 85.0      | 267.5   | 775.9   |
| <i>Instruments for expenditure</i>                                               |              |         |           |         |         |
| Distance from target (public health)                                             | 152          | 1.0667  | 0.5362    | 0.5392  | 6.6247  |
| Market Forces Factor (public health)                                             | 152          | 1.0122  | 0.0790    | 0.9151  | 1.2076  |
| Distance from target (healthcare: total)                                         | 152          | 1.0055  | 0.0515    | 0.9282  | 1.2250  |
| Age index (healthcare: prescribing)                                              | 152          | 0.9776  | 0.1283    | 0.6422  | 1.3007  |
| Market Forces Factor (healthcare: HCHS)                                          | 152          | 1.0063  | 0.0643    | 0.9319  | 1.1416  |
| <i>Socio-economic controls</i>                                                   |              |         |           |         |         |
| Proportion of all residents born outside the European Union                      | 152          | 0.1281  | 0.1147    | 0.0144  | 0.5060  |
| Proportion of population in white ethnic group                                   | 152          | 0.8364  | 0.1626    | 0.2897  | 0.9882  |
| Proportion of population providing unpaid care                                   | 152          | 0.1008  | 0.0138    | 0.0651  | 0.1289  |
| Proportion of population aged 16-74 with no qualifications                       | 152          | 0.2469  | 0.0606    | 0.0720  | 0.3874  |
| Proportion of households without a car                                           | 152          | 0.2862  | 0.1248    | 0.0899  | 0.6940  |
| Proportion of households that are owner occupied                                 | 152          | 0.6190  | 0.1152    | 0.2611  | 0.8086  |
| Proportion of households that are one pensioner households, 2011                 | 152          | 0.1206  | 0.0208    | 0.0596  | 0.1667  |
| Proportion of households that are lone parent households with dependent children | 152          | 0.0745  | 0.0185    | 0.0208  | 0.1436  |
| Proportion of population aged 16-74 that are permanently sick                    | 152          | 0.0424  | 0.0149    | 0.0086  | 0.0879  |
| Proportion of those aged 16-74 that are long-term unemployed                     | 152          | 0.0183  | 0.0058    | 0.0043  | 0.0367  |
| Proportion of those aged 16-74 in employment that are working agriculture        | 152          | 0.0064  | 0.0099    | 0.0003  | 0.0572  |
| Proportion of those aged 16-74 in managerial and professional occupations        | 152          | 0.3114  | 0.0769    | 0.1835  | 0.6674  |
| Index of multiple deprivation (2010)                                             | 152          | 23.0753 | 8.6040    | 5.4466  | 43.4465 |

1  
2  
3 The dozen potential socio-economic controls for the need for health are also listed in Table 1.  
4 These census-based variables are constructed using the 2011 census. They show that, for  
5 example, on average, 13% of all residents are born outside the European Union, 31% of the  
6 working-age population are employed in managerial and professional occupations, and 62%  
7 of households are owner occupied. Again, these averages mask considerable variation across  
8 local authorities; the proportion of residents born outside the EU varies from less than 2% to  
9 more than 50%, and the extent of owner occupation ranges between 26% and 81% of all  
10 households. All specifications are estimated using the *ivreg2* command in *Stata*.<sup>19</sup>  
11  
12  
13  
14  
15  
16  
17  
18

### 19 **3. Results**

#### 20 *3.1 With the public health grant as the only expenditure variable*

21 Estimation of equation (1) with public health as the sole expenditure variable generates the  
22 result shown in column 1 of table 2. The corresponding first-stage result is in column 1 of  
23 table A2 in online appendix A4. Application of the backward selection process generates the  
24 more parsimonious specification shown in column 2 of table 2. In this, public health  
25 expenditure has a modest but statistically significant negative association with mortality,  
26 expenditure is endogenous, there is no evidence of weak instruments (the Kleibergen-Paap F  
27 statistic exceeds the rule-of-thumb threshold value (=10)), and the specification passes the  
28 reset test. Details of the intermediate estimations associated with this backward selection  
29 process are in the online appendix A4.  
30  
31  
32  
33  
34  
35  
36  
37  
38

#### 39 *3.2 With both the public health grant and healthcare as the expenditure variables: backward selection*

40 Estimation of equation (1) with both public health and healthcare expenditure as endogenous  
41 regressors generates the result shown in column 3 of table 2. This specification includes five  
42 instruments (two for public health expenditure and three for healthcare expenditure). The  
43 corresponding first-stage results can be found in column 1 (for public health) and in column 2  
44 (for healthcare) in table A4 in the online appendix A4.  
45  
46  
47  
48  
49  
50  
51  
52

53 Application of the backward selection process generates the more parsimonious result shown  
54 in column 4 where both expenditure variables have the anticipated negative association with  
55 mortality, they are endogenous, the instrument set is valid, and the instrument sets for both  
56 endogenous variables are individually strong (the Sanderson-Windmeijer F-statistics are  
57  
58  
59  
60



1  
2  
3 around ten or better). Details of the intermediate estimations associated with the backward  
4 selection process are in the online appendix A4.  
5  
6  
7

### 8 *3.3 With both the public health grant and healthcare as the expenditure variables: forward* 9 *selection*

10  
11 The use of backward selection to identify relevant covariates when theory provides little  
12 guidance does not always meet with universal approval, and hence results are also reported  
13 using forward selection (see table 2, columns 5 and 6). Column 5 shows the result with the  
14 inclusion of the most significant single control ('permanently sick') with the same five  
15 instruments from the 'full' specification in column 3. Further re-estimation, with the  
16 inclusion of additional significant controls, generates the result shown in column 6. No  
17 further additional significant controls could be found and, as the result in column 6 is both in  
18 line with both our theoretical priors and passes the appropriate statistical tests, this is our  
19 preferred specification using forward selection. Details of the intermediate estimations  
20 associated with the forward selection process are in the online appendix.  
21  
22  
23  
24  
25  
26  
27  
28  
29

30  
31 The estimation of a mortality equation that includes both public health and healthcare  
32 expenditure generates an outcome elasticity for public health expenditure of -0.081 using  
33 backward selection and an elasticity of -0.144 using forward selection. The mid-point of  
34 these two elasticities is almost identical to the elasticity estimated without the inclusion of  
35 health care expenditure (= -0.115). Although statistically significant, these elasticities appear  
36 relatively modest when compared with the elasticity associated with healthcare expenditure  
37 (which, in this paper, is several times larger than the public health elasticity). However, this  
38 comparison is misleading because it fails to allow for the relative size of the two budgets  
39 (£65bn for healthcare and £2.5bn for public health in 2013/14). The coefficient on public  
40 health expenditure from column 2 of table 2 implies that a 1% increase in such expenditure  
41 (=£25.107m) in 2013/14 is associated with a 0.115% decline in the number of life years lost.  
42 However, a change in expenditure, which has an observed effect on mortality, is also likely to  
43 have effects on a more complete measure of health that captures the impact on survival and  
44 quality of life. Therefore, to convert the estimated all-cause elasticity into a likely QALY  
45 effect of public health expenditure we would ideally require evidence of the effects of public  
46 health expenditure on both all-cause mortality and on  
47  
48  
49  
50  
51  
52  
53  
54  
55  
56  
57  
58  
59  
60  
61  
62  
63  
64  
65  
66  
67  
68  
69  
70  
71  
72  
73  
74  
75  
76  
77  
78  
79  
80  
81  
82  
83  
84  
85  
86  
87  
88  
89  
90  
91  
92  
93  
94  
95  
96  
97  
98  
99  
100  
101  
102  
103  
104  
105  
106  
107  
108  
109  
110  
111  
112  
113  
114  
115  
116  
117  
118  
119  
120  
121  
122  
123  
124  
125  
126  
127  
128  
129  
130  
131  
132  
133  
134  
135  
136  
137  
138  
139  
140  
141  
142  
143  
144  
145  
146  
147  
148  
149  
150  
151  
152  
153  
154  
155  
156  
157  
158  
159  
160  
161  
162  
163  
164  
165  
166  
167  
168  
169  
170  
171  
172  
173  
174  
175  
176  
177  
178  
179  
180  
181  
182  
183  
184  
185  
186  
187  
188  
189  
190  
191  
192  
193  
194  
195  
196  
197  
198  
199  
200  
201  
202  
203  
204  
205  
206  
207  
208  
209  
210  
211  
212  
213  
214  
215  
216  
217  
218  
219  
220  
221  
222  
223  
224  
225  
226  
227  
228  
229  
230  
231  
232  
233  
234  
235  
236  
237  
238  
239  
240  
241  
242  
243  
244  
245  
246  
247  
248  
249  
250  
251  
252  
253  
254  
255  
256  
257  
258  
259  
260  
261  
262  
263  
264  
265  
266  
267  
268  
269  
270  
271  
272  
273  
274  
275  
276  
277  
278  
279  
280  
281  
282  
283  
284  
285  
286  
287  
288  
289  
290  
291  
292  
293  
294  
295  
296  
297  
298  
299  
300  
301  
302  
303  
304  
305  
306  
307  
308  
309  
310  
311  
312  
313  
314  
315  
316  
317  
318  
319  
320  
321  
322  
323  
324  
325  
326  
327  
328  
329  
330  
331  
332  
333  
334  
335  
336  
337  
338  
339  
340  
341  
342  
343  
344  
345  
346  
347  
348  
349  
350  
351  
352  
353  
354  
355  
356  
357  
358  
359  
360  
361  
362  
363  
364  
365  
366  
367  
368  
369  
370  
371  
372  
373  
374  
375  
376  
377  
378  
379  
380  
381  
382  
383  
384  
385  
386  
387  
388  
389  
390  
391  
392  
393  
394  
395  
396  
397  
398  
399  
400  
401  
402  
403  
404  
405  
406  
407  
408  
409  
410  
411  
412  
413  
414  
415  
416  
417  
418  
419  
420  
421  
422  
423  
424  
425  
426  
427  
428  
429  
430  
431  
432  
433  
434  
435  
436  
437  
438  
439  
440  
441  
442  
443  
444  
445  
446  
447  
448  
449  
450  
451  
452  
453  
454  
455  
456  
457  
458  
459  
460  
461  
462  
463  
464  
465  
466  
467  
468  
469  
470  
471  
472  
473  
474  
475  
476  
477  
478  
479  
480  
481  
482  
483  
484  
485  
486  
487  
488  
489  
490  
491  
492  
493  
494  
495  
496  
497  
498  
499  
500  
501  
502  
503  
504  
505  
506  
507  
508  
509  
510  
511  
512  
513  
514  
515  
516  
517  
518  
519  
520  
521  
522  
523  
524  
525  
526  
527  
528  
529  
530  
531  
532  
533  
534  
535  
536  
537  
538  
539  
540  
541  
542  
543  
544  
545  
546  
547  
548  
549  
550  
551  
552  
553  
554  
555  
556  
557  
558  
559  
560  
561  
562  
563  
564  
565  
566  
567  
568  
569  
570  
571  
572  
573  
574  
575  
576  
577  
578  
579  
580  
581  
582  
583  
584  
585  
586  
587  
588  
589  
590  
591  
592  
593  
594  
595  
596  
597  
598  
599  
600  
601  
602  
603  
604  
605  
606  
607  
608  
609  
610  
611  
612  
613  
614  
615  
616  
617  
618  
619  
620  
621  
622  
623  
624  
625  
626  
627  
628  
629  
630  
631  
632  
633  
634  
635  
636  
637  
638  
639  
640  
641  
642  
643  
644  
645  
646  
647  
648  
649  
650  
651  
652  
653  
654  
655  
656  
657  
658  
659  
660  
661  
662  
663  
664  
665  
666  
667  
668  
669  
670  
671  
672  
673  
674  
675  
676  
677  
678  
679  
680  
681  
682  
683  
684  
685  
686  
687  
688  
689  
690  
691  
692  
693  
694  
695  
696  
697  
698  
699  
700  
701  
702  
703  
704  
705  
706  
707  
708  
709  
710  
711  
712  
713  
714  
715  
716  
717  
718  
719  
720  
721  
722  
723  
724  
725  
726  
727  
728  
729  
730  
731  
732  
733  
734  
735  
736  
737  
738  
739  
740  
741  
742  
743  
744  
745  
746  
747  
748  
749  
750  
751  
752  
753  
754  
755  
756  
757  
758  
759  
760  
761  
762  
763  
764  
765  
766  
767  
768  
769  
770  
771  
772  
773  
774  
775  
776  
777  
778  
779  
780  
781  
782  
783  
784  
785  
786  
787  
788  
789  
790  
791  
792  
793  
794  
795  
796  
797  
798  
799  
800  
801  
802  
803  
804  
805  
806  
807  
808  
809  
810  
811  
812  
813  
814  
815  
816  
817  
818  
819  
820  
821  
822  
823  
824  
825  
826  
827  
828  
829  
830  
831  
832  
833  
834  
835  
836  
837  
838  
839  
840  
841  
842  
843  
844  
845  
846  
847  
848  
849  
850  
851  
852  
853  
854  
855  
856  
857  
858  
859  
860  
861  
862  
863  
864  
865  
866  
867  
868  
869  
870  
871  
872  
873  
874  
875  
876  
877  
878  
879  
880  
881  
882  
883  
884  
885  
886  
887  
888  
889  
890  
891  
892  
893  
894  
895  
896  
897  
898  
899  
900  
901  
902  
903  
904  
905  
906  
907  
908  
909  
910  
911  
912  
913  
914  
915  
916  
917  
918  
919  
920  
921  
922  
923  
924  
925  
926  
927  
928  
929  
930  
931  
932  
933  
934  
935  
936  
937  
938  
939  
940  
941  
942  
943  
944  
945  
946  
947  
948  
949  
950  
951  
952  
953  
954  
955  
956  
957  
958  
959  
960  
961  
962  
963  
964  
965  
966  
967  
968  
969  
970  
971  
972  
973  
974  
975  
976  
977  
978  
979  
980  
981  
982  
983  
984  
985  
986  
987  
988  
989  
990  
991  
992  
993  
994  
995  
996  
997  
998  
999  
1000



Table 2 Derivation of preferred specifications for public health expenditure, 2013/14

| VARIABLES                                                     | (1)                                                                                                                                                 | (2)                                                                                                                                                    | (3)                                                                                                                                                                                     | (4)                                                                                                                                                                                        | (5)                                                                                                                                                                                       | (6)                                                                                                                                                                                       |
|---------------------------------------------------------------|-----------------------------------------------------------------------------------------------------------------------------------------------------|--------------------------------------------------------------------------------------------------------------------------------------------------------|-----------------------------------------------------------------------------------------------------------------------------------------------------------------------------------------|--------------------------------------------------------------------------------------------------------------------------------------------------------------------------------------------|-------------------------------------------------------------------------------------------------------------------------------------------------------------------------------------------|-------------------------------------------------------------------------------------------------------------------------------------------------------------------------------------------|
|                                                               | All causes<br>2013/14 PH spend<br>SYLLR 2013/14/15<br>outcome model<br>instrument PH spend<br><br>weighted<br>IV second stage<br>full specification | All causes<br>2013/14 PH spend<br>SYLLR 2013/14/15<br>outcome model<br>instrument PH spend<br><br>weighted<br>IV second stage<br>derived specification | All causes<br>2013/14 PH & PB spend<br>SYLLR 2013/14/15<br>outcome model<br>instrument PH&PB<br>spend<br>weighted<br>IV second stage<br>full specification<br><b>backward selection</b> | All causes<br>2013/14 PH & PB spend<br>SYLLR 2013/14/15<br>outcome model<br>instrument PH&PB<br>spend<br>weighted<br>IV second stage<br>derived specification<br><b>backward selection</b> | All causes<br>2013/14 PH & PB spend<br>SYLLR 2013/14/15<br>outcome model<br>instrument PH&PB<br>spend<br>weighted<br>IV second stage<br>initial specification<br><b>forward selection</b> | All causes<br>2013/14 PH & PB spend<br>SYLLR 2013/14/15<br>outcome model<br>instrument PH&PB<br>spend<br>weighted<br>IV second stage<br>derived specification<br><b>forward selection</b> |
| Public health spend per person                                | -0.084**<br>[0.041]                                                                                                                                 | -0.115**<br>[0.048]                                                                                                                                    | -0.024<br>[0.037]                                                                                                                                                                       | -0.081**<br>[0.034]                                                                                                                                                                        | -0.006<br>[0.025]                                                                                                                                                                         | -0.144***<br>[0.040]                                                                                                                                                                      |
| Healthcare spend per person                                   |                                                                                                                                                     |                                                                                                                                                        | -0.551<br>[0.413]                                                                                                                                                                       | -0.672***<br>[0.233]                                                                                                                                                                       | -1.012***<br>[0.244]                                                                                                                                                                      | -0.837***<br>[0.269]                                                                                                                                                                      |
| IMD 2010                                                      | 0.203***<br>[0.075]                                                                                                                                 | -0.505***<br>[0.157]                                                                                                                                   | 0.253***<br>[0.062]                                                                                                                                                                     | 0.221***<br>[0.063]                                                                                                                                                                        |                                                                                                                                                                                           |                                                                                                                                                                                           |
| Proportion of all residents born outside the EU               | -0.016<br>[0.018]                                                                                                                                   |                                                                                                                                                        | -0.043*<br>[0.024]                                                                                                                                                                      | -0.084***<br>[0.019]                                                                                                                                                                       |                                                                                                                                                                                           | -0.070***<br>[0.019]                                                                                                                                                                      |
| Proportion of population in white ethnic group                | 0.246***<br>[0.060]                                                                                                                                 |                                                                                                                                                        | 0.226***<br>[0.051]                                                                                                                                                                     |                                                                                                                                                                                            |                                                                                                                                                                                           |                                                                                                                                                                                           |
| Proportion of population providing unpaid care                | -0.439***<br>[0.167]                                                                                                                                | -0.231**<br>[0.091]                                                                                                                                    | -0.399***<br>[0.144]                                                                                                                                                                    | -0.479***<br>[0.096]                                                                                                                                                                       |                                                                                                                                                                                           | -0.547***<br>[0.122]                                                                                                                                                                      |
| Proportion of population aged 16-74 with no qualifications    | -0.034<br>[0.112]                                                                                                                                   |                                                                                                                                                        | -0.111<br>[0.105]                                                                                                                                                                       |                                                                                                                                                                                            |                                                                                                                                                                                           |                                                                                                                                                                                           |
| Proportion of households without a car                        | -0.062<br>[0.072]                                                                                                                                   |                                                                                                                                                        | -0.033<br>[0.087]                                                                                                                                                                       |                                                                                                                                                                                            |                                                                                                                                                                                           |                                                                                                                                                                                           |
| Proportion of households that are owner occupied              | 0.129*<br>[0.071]                                                                                                                                   |                                                                                                                                                        | 0.090<br>[0.075]                                                                                                                                                                        |                                                                                                                                                                                            |                                                                                                                                                                                           |                                                                                                                                                                                           |
| Proportion of households that are one pensioner households    | -0.082<br>[0.084]                                                                                                                                   |                                                                                                                                                        | -0.023<br>[0.079]                                                                                                                                                                       |                                                                                                                                                                                            |                                                                                                                                                                                           |                                                                                                                                                                                           |
| Lone parent households with dependent children                | 0.056<br>[0.060]                                                                                                                                    |                                                                                                                                                        | -0.048<br>[0.082]                                                                                                                                                                       |                                                                                                                                                                                            |                                                                                                                                                                                           |                                                                                                                                                                                           |
| Proportion of population aged 16-74 that are permanently sick | 0.315***<br>[0.070]                                                                                                                                 | 0.475***<br>[0.068]                                                                                                                                    | 0.237***<br>[0.068]                                                                                                                                                                     | 1.187***<br>[0.331]                                                                                                                                                                        | 0.554***<br>[0.031]                                                                                                                                                                       | 0.601***<br>[0.051]                                                                                                                                                                       |

|    |                                                               |           |           |           |           |           |
|----|---------------------------------------------------------------|-----------|-----------|-----------|-----------|-----------|
| 1  |                                                               |           |           |           |           |           |
| 2  |                                                               |           |           |           |           |           |
| 3  | Proportion of those aged 16-74 that are long-term unemployed  | 0.039     |           | 0.085     |           | 0.156***  |
| 4  |                                                               | [0.057]   |           | [0.060]   |           | [0.040]   |
| 5  | Proportion of those aged 16-74 working agriculture            | -0.015    |           | -0.007    |           |           |
| 6  |                                                               | [0.010]   |           | [0.013]   |           |           |
| 7  | Proportion of those aged 16-74 in professional occupations    | -0.201*** | -0.205*** | -0.259*** | -0.194*** |           |
| 8  |                                                               | [0.077]   | [0.049]   | [0.072]   | [0.045]   |           |
| 9  | IMD 2010, squared                                             |           | 0.092***  |           |           |           |
| 10 |                                                               |           | [0.028]   |           |           |           |
| 11 | Proportion of population aged 16-74 permanently sick, squared |           |           |           | 0.138***  |           |
| 12 |                                                               |           |           |           | [0.052]   |           |
| 13 | Constant                                                      | 5.532***  | 7.936***  | 8.714***  | 11.286*** | 15.008*** |
| 14 |                                                               | [0.649]   | [0.402]   | [2.852]   | [1.409]   | [1.756]   |
| 15 | Observations                                                  | 151       | 151       | 150       | 150       | 150       |
| 16 | Endogeneity test statistic                                    | 11.369    | 10.579    | 5.928     | 17.683    | 6.137     |
| 17 | Endogeneity p-value                                           | 0.001     | 0.001     | 0.052     | 0.000     | 0.046     |
| 18 | Hansen-Sargan test statistic                                  | 14.750    |           | 20.849    | 1.667     | 23.78     |
| 19 | Hansen-Sargan p-value                                         | 0.000     |           | 0.000     | 0.197     | 0.000     |
| 20 | Kleibergen-Paap LM test statistic                             | 26.821    | 32.762    | 9.027     | 16.034    | 24.002    |
| 21 | Kleibergen-Paap p-value                                       | 0.000     | 0.000     | 0.060     | 0.000     | 0.000     |
| 22 | Kleibergen-Paap F statistic                                   | 69.320    | 120.521   | 2.323     | 8.979     | 7.220     |
| 23 | Pesaran-Taylor reset statistic                                | 10.116    | 2.456     | 1.405     | 0.175     | 0.073     |
| 24 | Pesaran-Taylor p-value                                        | 0.001     | 0.117     | 0.236     | 0.676     | 0.788     |
| 25 | SW_PH F-statistic                                             | n/a       | n/a       | 70.796    | 70.796    | 100.608   |
| 26 | SW_PH p-value                                                 | n/a       | n/a       | 0.000     | 0.000     | 0.000     |
| 27 | SW_PB F-statistic                                             | n/a       | n/a       | 13.469    | 13.469    | 9.052     |
| 28 | SW_PB p-value                                                 | n/a       | n/a       | 0.000     | 0.000     | 0.000     |

Robust standard errors in brackets

\*\*\* p<0.01, \*\* p<0.05, \* p<0.1

1  
2  
3 Direct estimates of the QALY effects of public health expenditure are not available.  
4  
5 However, previous work has used the estimated mortality effects of changes in NHS  
6  
7 healthcare expenditure to calculate the QALY effects,<sup>12</sup> and a similar approach is employed  
8  
9 here. It is estimated that, in 2012/13, a 1% change in total healthcare expenditure generates  
10  
11 65,773 QALYs across all disease areas and this result implies an all-cause mortality elasticity  
12  
13 of -1.028. This suggests that a 1% reduction in all-cause mortality is associated with a gain  
14  
15 of 63,981 QALYs (65,773/1.028).<sup>12</sup> Therefore, a 1% increase in public health expenditure  
16  
17 (£25.107m), which reduces all-cause mortality by 0.115% is associated with a gain of 7,358  
18  
19 QALYs (0.115 x 63,981). This 7,358 QALY gain, together with the additional expenditure  
20  
21 of £25.107m, implies a cost per QALY for local public health expenditure of £3,412 (column  
22  
23 3, table 3).

24  
25 Similar calculations can be made for the two other public health elasticities (-0.081 and  
26  
27 -0.144) reported in table 2 and the implied cost per QALY estimates are £4,845 and £2,725  
28  
29 respectively (see column 3 of table 3). Using the same method, we can also use convert the  
30  
31 all-cause healthcare elasticities in column 2 of table 2 into cost per QALY estimates. The  
32  
33 backward selection elasticity (= -0.672) implies a cost per QALY of £14,921, while the  
34  
35 forward selection elasticity (= -0.837) implies a cost per QALY of £11,973 (see column 4 of  
36  
37 table 3).

38  
39 Another way to look at the impact of changes in expenditure is to calculate the total health  
40  
41 gains/losses associated with any such change. For example, two leading health charities  
42  
43 recently estimated that (local) public health funding would have to increase by £1bn in  
44  
45 2020/21 for real expenditure per person to be restored to its 2015/16 level.<sup>20</sup> We can use our  
46  
47 cost per QALY estimates to calculate the total health gains associated with such a budget  
48  
49 boost. If the £1bn is allocated to public health then the total health gain will be 206,398  
50  
51 QALYs (=£1bn/£4,845). This calculation uses the most conservative of the two elasticities  
52  
53 for health outcomes (-0.081) associated with public health expenditure. Alternatively, if the  
54  
55 additional £1bn is allocated to healthcare then the total health gain will be 67,018 QALYs  
56  
57 (=£1bn/£14,921). This calculation uses the most conservative of the two elasticities for  
58  
59 health outcomes (-0.672) associated with healthcare expenditure.

60  
61 Similar health gain calculations can be made using the (less conservative) elasticities obtained  
62  
63 using the forward selection process. The health gain estimates for public health and NHS

1  
2  
3 treatment expenditure, and for forward and backward selection, are shown in columns 5 and 6  
4 of table 3. These health gain estimates, together with 95% confidence intervals, are  
5 illustrated graphically in figure 1.  
6  
7  
8  
9  
10  
11  
12  
13  
14  
15  
16  
17  
18  
19  
20  
21  
22  
23  
24  
25  
26  
27  
28  
29  
30  
31  
32  
33  
34  
35  
36  
37  
38  
39  
40  
41  
42  
43  
44  
45  
46  
47  
48  
49  
50  
51  
52  
53  
54  
55  
56  
57  
58  
59  
60

For peer review only

Table 3 Mortality elasticities and cost per quality adjusted life year estimates for public health and healthcare expenditure, 2013/14

| Outcome specification                                                    | Mortality elasticity associated with public health expenditure | Mortality elasticity associated with healthcare expenditure | Cost per QALY (£) |            | Health (QALY) gains associated with £1bn budget boost |            |
|--------------------------------------------------------------------------|----------------------------------------------------------------|-------------------------------------------------------------|-------------------|------------|-------------------------------------------------------|------------|
|                                                                          |                                                                |                                                             | public health     | healthcare | public health                                         | healthcare |
|                                                                          | col 1                                                          | col 2                                                       | col 3             | col 4      | col 5                                                 | col 6      |
| <b>With public health spend only:</b><br>backward selection              | -0.115<br>[0.048]                                              | n/a<br>n/a                                                  | £3,412            | n/a        | 293,083                                               | n/a        |
| <b>With public health and healthcare spend</b><br>(a) backward selection | -0.081<br>[0.034]                                              | -0.672<br>[0.233]                                           | £4,845            | £14,912    | 206,415                                               | 67,060     |
| (b) forward selection                                                    | -0.144<br>[0.040]                                              | -0.837<br>[0.269]                                           | £2,725            | £11,973    | 366,960                                               | 83,473     |

For peer review only

#### 4. Discussion

If we compare the average of the backward and forward selection estimates, then public health expenditure appears to be about three to four times more productive than healthcare expenditure; that is, the prevention cost per QALY is about £3,800 whereas the treatment cost is £13,500. Similarly, the total health gains associated with a spending boost in public health are about three and a half times as great as those associated with the same boost in healthcare expenditure. This finding – that public health offers a much better return than healthcare at the margin – is also reported by other (American) studies.<sup>10 21</sup> Our (marginal) cost per QALY estimate for the public health grant (£3,800) is about halfway between the median cost per QALY associated with public health interventions assessed by NICE between 2005 and 2010 (£1,053), and between 2011 and 2016 (£7,843).<sup>8</sup>

Our cost per QALY estimates for the public health grant can also be compared with the return on investment associated with the public health interventions revealed by a systematic search of the literature.<sup>22</sup> This reported that, across both local and national interventions, a median return on investment (ROI) of 14.3 to 1. Putting aside average versus marginal differences, we can convert the cost per QALY associated with the public health grant (of about £3,800) into a societal ROI of about 15 to 1 if we assume that the value of a QALY is about £60,000 (this is the figure used by HM Treasury to evaluate public sector programmes).<sup>23</sup> Thus our cost per QALY estimates are very much in line with the findings from other studies that have used very different data sets and very different approaches to estimation.

Our findings suggest that at the margin public health expenditure is very productive of health and more productive than NHS expenditure. This suggests that the reallocation of resources from NHS healthcare to public health is likely to improve health outcomes overall and that the squeeze on the public health grant while protecting NHS expenditure over recent years is likely to have reduced health outcomes. It also means that new investments in public health interventions need to cost less than £3,800 per QALY to be accommodated within current levels of funding.

Our results also suggest that NHS expenditure is very productive of health (about £13,500 per QALY) and that it is considerably more productive than: (a) the norm (£30,000 per QALY) used by NICE to judge whether new technologies are cost-effective; and (b) HM Treasury's

1  
2  
3 value of a QALY (£60,000) when assessing public sector projects.<sup>23</sup> Our results also suggest  
4 that the inclusion of prevention expenditure in the health outcome equation does not  
5 materially affect the estimated cost per QALY associated with treatment expenditure. The  
6 cost per QALY for NHS expenditure reported here is similar to previous estimates where  
7 public health expenditure was excluded.<sup>11 12 17</sup>  
8  
9  
10  
11  
12

13 Different levels of expenditure on local public health services may affect mortality both  
14 directly and indirectly. For example, a recent review estimated that approximately one in five  
15 hospital in-patients in the UK are using alcohol harmfully, and one in ten is alcohol-  
16 dependent.<sup>24</sup> These figures are ten and eight times higher respectively than the general  
17 population.<sup>24</sup> Reductions in local community-based alcohol misuse services might increase  
18 alcohol-related mortality rates. They might also increase non-alcohol related mortality as  
19 addicts, who would have been treated in the community, now require hospitalisation and, by  
20 occupying a bed, delay other patients' access to hospital services.  
21  
22  
23  
24  
25  
26  
27  
28

29 Although our results are plausible, this study is not without its limitations. First, our focus is  
30 on the impact of the public health grant (£2.5bn in 2013/14) and we ignore the impact of  
31 other health-related expenditure (eg such as social care). Second, we ignore the impact of  
32 national public health programmes (eg for national immunisation and national screening  
33 programmes). These are the responsibility of the NHS Commissioning Board and are  
34 omitted because we do not have data for expenditure on national programmes by local area.  
35 Also, there will be some treatment expenditure within the public health grant, and there will  
36 be some prevention spend within the measure of CCG healthcare expenditure.  
37  
38  
39  
40  
41  
42  
43  
44

45 Moreover, equation (1) is static in the sense that it assumes that all health benefits occur  
46 contemporaneously with expenditure. However, our empirical implementation of (1) does  
47 slightly better than this because our outcome measure reflects not only mortality in the same  
48 year as expenditure but also in the two subsequent years. In a recent Californian study just  
49 over half of the cumulative lives saved as a result of a single year of public health spending  
50 occurred in the two years immediately following that expenditure.<sup>25</sup> Nevertheless we readily  
51 acknowledge that, for some public health expenditure, the health benefits might arise many  
52 years after the expenditure has occurred. This is particularly likely to be the case where  
53 expenditure is directed at encouraging healthy lifestyles, where some benefits may occur two  
54 or three decades after the actual expenditure. Finally, there is always the possibility that we  
55  
56  
57  
58  
59  
60

1  
2  
3 have omitted a relevant variable (eg one that affects both mortality and expenditure) from our  
4 regression specifications and such an omission might bias our results.  
5  
6  
7  
8  
9

## 10 **5. Conclusions**

11  
12 An increase in public health expenditure is more productive of health than a change in NHS  
13 healthcare expenditure, and hence the recent proposal to shift resources away from the latter  
14 and towards the former is an evidence-based one. However, NHS healthcare expenditure is  
15 also productive of health and the cost per QALY (£13,500) is less than one-quarter of the  
16 value of a QALY (£60,000) used by HM Treasury when evaluating public sector projects.  
17 These comparisons suggest that additional prevention and healthcare expenditure, whether  
18 funded through additional taxation, borrowing or reallocation from other spending  
19 departments, appear good value when compared with the Treasury's estimates of the  
20 consumption value of health. Our cost per QALY calculations reveal that public health  
21 expenditure appears to be about three to four times more productive at the margin than  
22 healthcare expenditure. Thus Benjamin Franklin's axiom – that 'an ounce of prevention is  
23 worth a pound of cure' – is correct in this context in the sense that prevention is more  
24 productive than cure but, with 16 ounces to the pound, the adage rather exaggerates the size  
25 of this advantage.  
26  
27  
28  
29  
30  
31  
32  
33  
34  
35  
36  
37  
38  
39  
40  
41  
42  
43  
44  
45  
46  
47  
48  
49  
50  
51  
52  
53  
54  
55  
56  
57  
58  
59  
60



## References

1. Office for National Statistics. Healthcare expenditure, UK Health Accounts: 2017. See <https://www.ons.gov.uk/peoplepopulationandcommunity/healthandsocialcare/healthcaresystem/bulletins/ukhealthaccounts/2017>.
2. DHSC, 2018. Prevention is better than cure: Our vision to help you live well for longer. See: <https://www.gov.uk/government/publications/prevention-is-better-than-cure-our-vision-to-help-you-live-well-for-longer>.
3. Command Paper 110, 2019. Advancing our health: Prevention in the 2020s. See: <https://www.gov.uk/government/consultations/advancing-our-health-prevention-in-the-2020s>.
4. Department for Business, Energy and Industrial Strategy, 2019. The Grand Challenges. Available at: <https://www.gov.uk/government/publications/industrial-strategy-the-grand-challenges/industrial-strategy-the-grand-challenges>.
5. HM Treasury, September 2019. Spending Round 2019. CP170. Available at: [https://assets.publishing.service.gov.uk/government/uploads/system/uploads/attachment\\_data/file/829177/Spending\\_Round\\_2019\\_web.pdf](https://assets.publishing.service.gov.uk/government/uploads/system/uploads/attachment_data/file/829177/Spending_Round_2019_web.pdf).
6. Anandaciva, S. (2019). Five numbers to sum up the Spending round for health and social care. The King's Fund. See: <https://www.kingsfund.org.uk/publications/spending-round-health-social-care>.
7. Bunn, J (2019). New burdens could wipe out public health grant uplift. HSJ, 30 September. See: <https://www.hsj.co.uk/public-health/new-burdens-could-wipe-out-public-health-grant-uplift/7026030.article>.
8. Owen, L., Pennington, B., Fischer, A. and Jeong, K. (2018). The cost-effectiveness of public health interventions examined by NICE from 2011 to 2016. *Journal of Public Health*, Volume 40, Issue 3, 1 September 2018, Pages 557–566. Available at: <https://doi.org/10.1093/pubmed/fox119> [accessed 08 March 2019].
9. Dillon, A. 2015. Carrying NICE over the threshold. See: <https://www.nice.org.uk/news/blog/carrying-nice-over-the-threshold>.
10. Brown T. T. (2014). How effective are public health departments at preventing mortality? *Econ Hum Biol.*,13:34–45. See: <https://www.sciencedirect.com/science/article/pii/S1570677X13000920?via%3Dihub>.
11. Claxton, K., Martin, S., Soares M, Rice N, Spackman E, Hinde S, Devlin N, Smith PC and Sculpher M, 2015. Methods for the estimation of the National Institute for Health and Care Excellence cost-effectiveness threshold. *Health technology assessment*, 2015 Feb, 19(14), pp.1-503, v-vi. Available at: <https://www.ncbi.nlm.nih.gov/pubmed/25692211>.
12. Lomas, J., Claxton, K., and Martin, S. (2019). Estimating the marginal productivity of the English National Health Service from 2003/04 to 2012/13. *Value in Health*, forthcoming. DOI: <https://doi.org/10.1016/j.jval.2019.04.1926>.
13. NHS England (2015). 2013-14 CCG Programme Budgeting Benchmarking Tool. Available from <https://www.england.nhs.uk/prog-budgeting/> [accessed 08 January, 2019].
14. DH (2012a). Public health functions to be exercised by the NHS Commissioning Board. Available from:

- 1  
2  
3  
4  
5  
6  
7  
8  
9  
10  
11  
12  
13  
14  
15  
16  
17  
18  
19  
20  
21  
22  
23  
24  
25  
26  
27  
28  
29  
30  
31  
32  
33  
34  
35  
36  
37  
38  
39  
40  
41  
42  
43  
44  
45  
46  
47  
48  
49  
50  
51  
52  
53  
54  
55  
56  
57  
58  
59  
60
- [https://assets.publishing.service.gov.uk/government/uploads/system/uploads/attachment\\_data/file/213153/s7A-master-131114-final.pdf](https://assets.publishing.service.gov.uk/government/uploads/system/uploads/attachment_data/file/213153/s7A-master-131114-final.pdf) [accessed 08 March 2019].
15. MCHLG (2015). Local authority revenue expenditure and financing England: 2013 to 2014 individual local authority data – outturn. See <https://www.gov.uk/government/statistics/local-authority-revenue-expenditure-and-financing-england-2013-to-2014-individual-local-authority-data-outturn>.
16. Andrews, M. et al., 2017. Inference in the presence of redundant moment conditions and the impact of government health expenditure on health outcomes in England. *Econometric Reviews*, 36(1–3), pp.23–41. Available at: <https://www.tandfonline.com/doi/full/10.1080/07474938.2016.1114205> [Accessed July 24, 2017].
17. Claxton, K., Lomas, J. & Martin, S., 2018. The impact of NHS expenditure on health outcomes in England: Alternative approaches to identification in all-cause and disease specific models of mortality. *Health Economics*, 27(6), pp.1017-1023. Available at: <https://onlinelibrary.wiley.com/doi/abs/10.1002/hec.3650> [Accessed July 17, 2018].
18. DH (2012b). Exposition Book Public Health Allocations 2013-14 and 2014-15: Technical Guide. This is available at: [https://assets.publishing.service.gov.uk/government/uploads/system/uploads/attachment\\_data/file/213324/Public-Health-Weighted-Capitation-FormulaTechnical-Guide-v0.13.pdf](https://assets.publishing.service.gov.uk/government/uploads/system/uploads/attachment_data/file/213324/Public-Health-Weighted-Capitation-FormulaTechnical-Guide-v0.13.pdf).
19. Baum, C.F., Schaffer, M.E., Stillman, S. (2010). ivreg2: Stata module for extended instrumental variables/2SLS, GMM and AC/HAC, LIML and k-class regression. Available from: <http://ideas.repec.org/c/boc/bocode/s425401.html>
20. The King’s Fund, 2019. Health charities make urgent call for £1 billion a year to reverse cuts to public health funding. 12 June. See <https://www.kingsfund.org.uk/press/press-releases/reverse-cuts-public-health-funding> [accessed 13 November 2019].
21. Leider J P, Natalia Alfonso, Beth Resnick, Eoghan Brady, J. McCullough, and David Bishai (2018). Assessing The Value Of 40 Years Of Local Public Expenditures On Health. *Health Affairs* 37, 4: 560–569. DOI: 10.1377/hlthaff.2017.1171.
22. Masters R, Anwar E, Collins B, Cookson, R, Capewel S. (2017). Return on investment of public health interventions: a systematic review. *J Epidemiol Community Health*;71:827834. Available from: <https://jech.bmj.com/content/jech/71/8/827.full.pdf>.
23. HM Treasury, 2018. The Green Book: Central government guidance on appraisal and evaluation.
24. Roberts, E., Morse, R., Epstein, S., Hotopf, M., Leon, D. and Drummond C. (2019). The prevalence of wholly attributable alcohol conditions in the United Kingdom hospital system: a systematic review, meta-analysis and meta-regression. *Addiction*, July, <https://doi.org/10.1111/add.14642> [accessed 22 August 2019].
25. Brown T. T. (2016). Returns on Investment in California County Departments of Public Health. *Am J Public Health*. 2016 Aug;106(8):1477-82. doi: 10.2105/AJPH.2016.30323

Figure 1 Total health gains associated with a £1bn budget boost for public health and NHS treatment expenditure, by method of selection of covariates

For peer review only

1  
2  
3  
4  
5  
6  
7  
8  
9  
10  
11  
12  
13  
14  
15  
16  
17  
18  
19  
20  
21  
22  
23  
24  
25  
26  
27  
28  
29  
30  
31  
32  
33  
34  
35  
36  
37  
38  
39  
40  
41  
42  
43  
44  
45  
46  
47  
48  
49  
50  
51  
52  
53  
54  
55  
56  
57  
58  
59  
60

Figure 1 Total health gains associated with a £1bn budget boost for public health and NHS treatment expenditure, by method of selection of covariates

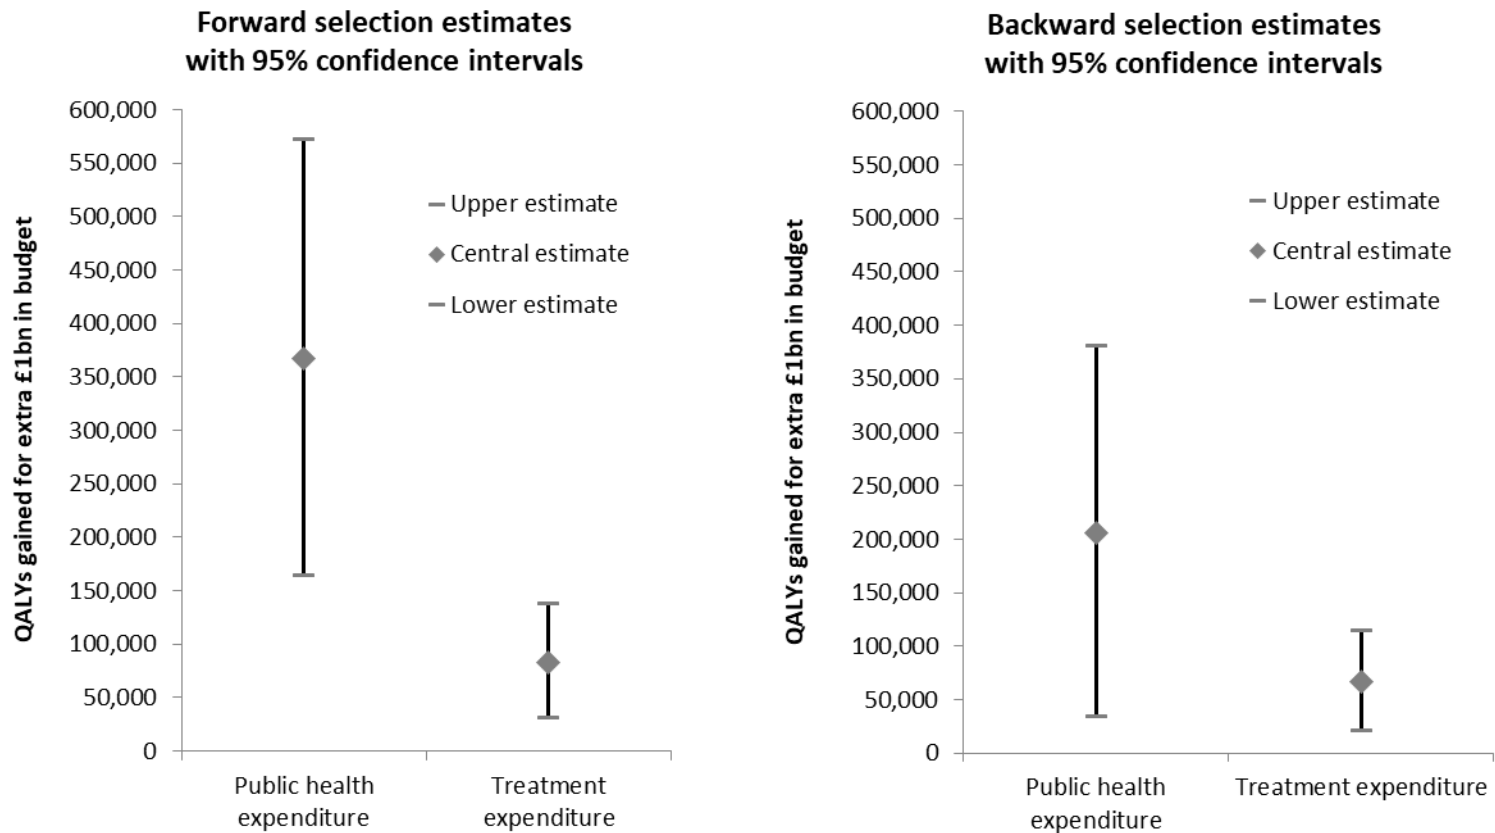

1  
2  
3  
4  
5  
6  
7  
8  
9  
10  
11  
12  
13

# Is an ounce of prevention worth a pound of cure?

## Estimates of the impact of English public health grant on mortality and morbidity

### Appendices

#### Appendix A1

##### Is public health expenditure solely preventative?

14  
15  
16  
17  
18  
19  
20  
21  
22  
23  
24  
25  
26  
27  
28  
29  
30  
31  
32  
33  
34  
35  
36  
37  
38  
39  
40  
41  
42  
43  
44  
45  
46  
47  
48  
49  
50  
51  
52  
53  
54  
55  
56  
57  
58  
59  
60

One rudimentary guide to the volume of preventative expenditure by CCGs is provided by the programme budgeting data set for 2013/14. This reports a total spend of £411m in the 'Healthy Individuals' programme of which £151m is for 'prescribing in primary care' and £190m is for 'community and integrated care'.<sup>1</sup> In principle we could add this expenditure (£411m) to that from the public health grant (£2,500m) to obtain an overall measure of public health spend. However, as the precise set of activities covered by this CCG 'Healthy Individuals' expenditure is unclear and there are always issues about how consistently different CCGs allocate activity to different programme budget categories, we prefer to focus on the public health grant as our measure of public health expenditure. We include the 'Healthy Individuals' spend as part of the total measure of healthcare (treatment) expenditure. Our estimates of the impact of the public health grant and CCG expenditure will largely reflect 'prevention' and 'treatment' effects respectively, but we acknowledge that there will be relatively small elements of treatment expenditure in the prevention measure, and relatively small elements of prevention expenditure in the treatment measure.

## Appendix A2

### On the use of the market forces factor (MFF) as an instrument for public health expenditure

The local input price index (MFF), which will reflect characteristics of the local (health) economy, may be correlated with unmeasured determinants of mortality. However, we have over a dozen potential socio-economic covariates (including the Index of Multiple Deprivation) in the baseline mortality equation and hence it is difficult to imagine what effect the input price index would detect that our covariates do not. Of course, if a locality gets a larger budget to compensate for the higher cost of supplying healthcare, as happens with the local price index, and this adjustment exactly compensates for additional costs, then there is no reason why this additional spending should improve health because it does not correspond to an increase in real spending. In reality, of course, the cost adjustment will not be perfect. Some local authorities will be over compensated and hence receive 'too much' funding; others will be under compensated and receive 'too small' a budget. This imperfect adjustment for local conditions provides the link between this instrument, expenditure and mortality. The same argument applies to the use of the age index as an instrument for healthcare expenditure discussed later.

## Appendix A3

### Estimation strategy with the inclusion of healthcare expenditure

Initially the health outcome equation (equation 1) is estimated using the strategy described in section 2.2 with public health as the sole health expenditure variable. We then re-estimate equation 1 – using the same strategy – but this time including healthcare expenditure as an additional endogenous regressor. This variable is instrumented in a similar way to public health. However, the identification of the relevant funding rule variables is slightly complicated because of the changes imposed by the Health and Social Care Act 2012. Usually funding formulae are updated every year but the impending abolition of PCTs meant that the weighted capitation formula was frozen for 2012-13, with all PCTs receiving the same (3%) growth rate over their 2011/12 allocations. As CCG responsibilities in 2013/14 differed from those for PCTs (eg they lost responsibility for public health, specialised services, and primary care), there was a baseline exercise in 2012 that stripped out actual expenditure on these components and, for 2013-14, each CCG was given an uplift of 2.3% on these 2012 baselines.<sup>2</sup>

The implication of these developments for this study is that the best funding rule variables we can identify for CCG healthcare expenditure in 2013/14 are drawn from the 2011/12 allocations for PCTs, appropriately mapped to the new (CCG) geography. These allocations reflect three separate funding formulae (one for Hospital and Community Services (HCHS), one for prescribing, and one for primary care), and we select three funding rule variables employed in these formulae which we believe are uncorrelated with mortality. In particular, our funding rule variables for healthcare expenditure are: (i) the DFT for the total allocation to PCTs for 2011/12; (ii) the MFF for the HCHS component of the total allocation; and (iii) the age index from the prescribing cost component of the total allocation. The DFT variable is available from the Department of Health's website at <https://www.networks.nhs.uk/nhsnetworks/health-investment-network/news/2012-13-programme-budgeting-data-is-nowavailable> (accessed 09 January 2019), and the MFF and prescribing cost age indices are available from the exposition books for the 2011/12 allocations at <https://www.gov.uk/government/publications/exposition-book-2011-2012> (accessed 09 January 2019).

A recent study provided no explicit arguments in support of these instruments for healthcare expenditure but this omission is easily remedied.<sup>3</sup> First, our measure of mortality and the prescribing cost age index instrument are both standardised for age, and so the age index is unlikely to be correlated with the error from equation (1). Second, and as already noted when discussing the

1  
2 instruments for public health expenditure, the local input price index will reflect characteristics of  
3 the local (health) economy and these might be correlated with unmeasured determinants of  
4 mortality. However, we have over a dozen potential socio-economic covariates in the baseline  
5 mortality equation and hence it is difficult to imagine what effect the MFF would detect that our  
6 covariates do not. Third, the DFT variable for healthcare allocations will reflect the various funding  
7 formulae and 'pace of change' policies implemented under several governments of various political  
8 persuasions over the past thirty years. The 'pace of change' and the consequent DFT are policy  
9 choices but it is not obvious that the latter will be endogenous with respect to mortality; and, as  
10 noted for the instruments for public health expenditure, any correlation between our instruments and  
11 the error term in equation (1) is likely to be detected by the Hansen-Sargan test.  
12  
13  
14  
15  
16  
17  
18  
19  
20  
21  
22  
23  
24  
25  
26  
27  
28  
29  
30  
31  
32  
33  
34  
35  
36  
37  
38  
39  
40  
41  
42  
43  
44  
45  
46  
47  
48  
49  
50  
51  
52  
53  
54  
55  
56  
57  
58  
59  
60



## Appendix A4

### Extended presentation of results

#### *With the public health grant as the only expenditure variable*

Estimation of the health outcome equation (equation 1) with public health as the sole expenditure variable generates the result shown in column 1 of table A1. The corresponding first-stage result is in column 1 of table A2. Application of the backward selection process generates the more parsimonious specification shown in column 2 of table A1. Public health expenditure has the anticipated negative association with mortality but this specification fails the reset test and the instrument set is invalid (the Hansen-Sargan test statistic  $p$ value $<0.100$ ). The addition of IMD 2010 squared to the specification resolves the reset test but not the instrument validity issue (column 3). The result in column 4 omits that instrument (the MFF index) which is the most significant when added as a control to the second-stage equation. The significant positive coefficient (0.252) on the 'white ethnicity' variable might reflect a lifestyle effect but, in the interests of clarity, we re-estimate without this variable and obtain the result shown in column 5. The coefficient on the 'permanently sick' variable increases considerably (from 0.265 to 0.475) and the coefficient on the 'working in agriculture' variable is no longer significant. Re-estimation without the latter variable generates our preferred specification shown in column 6. In this, public health expenditure has a modest but statistically significant negative association with mortality, expenditure is endogenous, there is no evidence of weak instruments (the Kleibergen-Paap F statistic exceeds the rule-of-thumb threshold value (=10)), and the specification passes the reset test.

Table A1 Derivation of preferred specification for public health expenditure, second-stage results, 2013/14

|                                                               | (1)                  | (2)                  | (3)                  | (4)                  | (5)                  | (6)                  |
|---------------------------------------------------------------|----------------------|----------------------|----------------------|----------------------|----------------------|----------------------|
|                                                               | All causes           |
|                                                               | 2013/14 PH spend     |
|                                                               | SYLLR 2013/14/15     |
|                                                               | outcome model        |
|                                                               | instrument PH spend  |
|                                                               | weighted             | weighted             | weighted             | weighted             | weighted             | weighted             |
|                                                               | IV second stage      |
|                                                               | full specification   | new derivation       |
|                                                               |                      |                      | revised1             | revised2             | revised2             | revised2             |
| VARIABLES                                                     |                      |                      |                      |                      | SA_1                 | SA_2                 |
| Public health spend per person                                | -0.084**<br>[0.041]  | -0.122***<br>[0.046] | -0.108**<br>[0.043]  | -0.119***<br>[0.043] | -0.116**<br>[0.047]  | -0.115**<br>[0.048]  |
| IMD 2010                                                      | 0.203***<br>[0.075]  | 0.152**<br>[0.063]   | -0.271*<br>[0.141]   | -0.374**<br>[0.146]  | -0.509***<br>[0.163] | -0.505***<br>[0.157] |
| Proportion of all residents born outside the EU               | -0.016<br>[0.018]    |                      |                      |                      |                      |                      |
| Proportion of population in white ethnic group                | 0.246***<br>[0.060]  | 0.261***<br>[0.039]  | 0.249***<br>[0.038]  | 0.252***<br>[0.038]  |                      |                      |
| Proportion of population providing unpaid care                | -0.439***<br>[0.167] | -0.346***<br>[0.088] | -0.271***<br>[0.083] | -0.235***<br>[0.084] | -0.235***<br>[0.090] | -0.231**<br>[0.091]  |
| Proportion of population aged 16-74 with no qualifications    | -0.034<br>[0.112]    |                      |                      |                      |                      |                      |
| Proportion of households without a car                        | -0.062<br>[0.072]    |                      |                      |                      |                      |                      |
| Proportion of households that are owner occupied              | 0.129*<br>[0.071]    |                      |                      |                      |                      |                      |
| Proportion of households that are one pensioner households    | -0.082<br>[0.084]    |                      |                      |                      |                      |                      |
| Lone parent households with dependent children                | 0.056<br>[0.060]     |                      |                      |                      |                      |                      |
| Proportion of population aged 16-74 that are permanently sick | 0.315***<br>[0.070]  | 0.319***<br>[0.077]  | 0.284***<br>[0.071]  | 0.265***<br>[0.072]  | 0.475***<br>[0.067]  | 0.475***<br>[0.068]  |
| Proportion of those aged 16-74 that are long-term unemployed  | 0.039<br>[0.057]     |                      |                      |                      |                      |                      |
| Proportion of those aged 16-74 working agriculture            | -0.015<br>[0.010]    | -0.025***<br>[0.007] | -0.020***<br>[0.007] | -0.016**<br>[0.007]  | 0.001<br>[0.007]     |                      |
| Proportion of those aged 16-74 in professional occupations    | -0.201***<br>[0.077] | -0.268***<br>[0.044] | -0.243***<br>[0.046] | -0.230***<br>[0.047] | -0.204***<br>[0.050] | -0.205***<br>[0.049] |

1  
2  
3  
4  
5  
6  
7  
8  
9  
10  
11  
12  
13  
14  
15  
16  
17  
18  
19  
20  
21  
22  
23  
24  
25  
26  
27  
28  
29  
30  
31  
32  
33  
34  
35  
36  
37  
38  
39  
40  
41  
42  
43  
44  
45  
46

|                                   |          |          |          |          |          |          |
|-----------------------------------|----------|----------|----------|----------|----------|----------|
| IMD 2010 Squared                  |          |          | 0.078*** | 0.100*** | 0.093*** | 0.092*** |
|                                   |          |          | [0.026]  | [0.027]  | [0.029]  | [0.028]  |
| Constant                          | 5.532*** | 5.895*** | 6.514*** | 6.710*** | 7.941*** | 7.936*** |
|                                   | [0.649]  | [0.349]  | [0.393]  | [0.402]  | [0.397]  | [0.402]  |
| Observations                      | 151      | 151      | 151      | 151      | 151      | 151      |
| Endogeneity test statistic        | 11.369   | 10.449   | 8.572    | 15.109   | 13.881   | 10.579   |
| Endogeneity p-value               | 0.001    | 0.001    | 0.003    | 0.000    | 0.000    | 0.001    |
| Hansen-Sargan test statistic      | 14.750   | 10.957   | 14.408   |          |          |          |
| Hansen-Sargan p-value             | 0.000    | 0.001    | 0.000    |          |          |          |
| Kleibergen-Paap LM test statistic | 26.821   | 34.909   | 35.502   | 34.884   | 34.868   | 32.762   |
| Kleibergen-Paap p-value           | 0.000    | 0.000    | 0.000    | 0.000    | 0.000    | 0.000    |
| Kleibergen-Paap F statistic       | 69.320   | 88.578   | 99.555   | 192.280  | 185.421  | 120.521  |
| Pesaran-Taylor reset statistic    | 10.116   | 6.248    | 0.599    | 0.469    | 2.422    | 2.456    |
| Pesaran-Taylor p-value            | 0.001    | 0.012    | 0.439    | 0.493    | 0.120    | 0.117    |

Robust standard errors in brackets  
\*\*\* p<0.01, \*\* p<0.05, \* p<0.1

For peer review only

Table A2 First-stage regression results for derivation of preferred specification for public health expenditure, 2013/14

|                                                               | (1)                | (2)              | (3)              | (4)              | (5)              | (6)              |
|---------------------------------------------------------------|--------------------|------------------|------------------|------------------|------------------|------------------|
|                                                               | All causes         | All causes       | All causes       | All causes       | All causes       | All causes       |
|                                                               | 2013/14 PH spend   | 2013/14 PH spend | 2013/14 PH spend | 2013/14 PH spend | 2013/14 PH spend | 2013/14 PH spend |
|                                                               | SYLLR 2013/14/15   | SYLLR 2013/14/15 | SYLLR 2013/14/15 | SYLLR 2013/14/15 | SYLLR 2013/14/15 | SYLLR 2013/14/15 |
|                                                               | outcome model      | outcome model    | outcome model    | outcome model    | outcome model    | outcome model    |
|                                                               | first-stage        | first-stage      | first-stage      | first-stage      | first-stage      | first-stage      |
|                                                               | weighted           | weighted         | weighted         | weighted         | weighted         | weighted         |
|                                                               | OLS                | OLS              | OLS              | OLS              | OLS              | OLS              |
|                                                               | full specification | new derivation   |
| VARIABLES                                                     |                    |                  | revised1         | revised2         | revised2         | revised2         |
|                                                               |                    |                  |                  |                  | SA_1             | SA_2             |
| DFT index_Public health_1314                                  | 0.729***           | 0.747***         | 0.762***         | 0.759***         | 0.759***         | 0.739***         |
|                                                               | [0.062]            | [0.056]          | [0.054]          | [0.055]          | [0.056]          | [0.067]          |
| MFF Index_Public health_1314                                  | -0.655*            | -0.559           | -0.565           |                  |                  |                  |
|                                                               | [0.350]            | [0.348]          | [0.352]          |                  |                  |                  |
| IMD 2010                                                      | 0.122              | 0.139            | -0.590           | -0.548           | -0.599*          | -0.931**         |
|                                                               | [0.137]            | [0.113]          | [0.388]          | [0.357]          | [0.357]          | [0.388]          |
| Proportion of all residents born outside the EU               | 0.031              |                  |                  |                  |                  |                  |
|                                                               | [0.050]            |                  |                  |                  |                  |                  |
| Proportion of population in white ethnic group                | 0.309*             | 0.020            | 0.028            | 0.095            |                  |                  |
|                                                               | [0.178]            | [0.083]          | [0.080]          | [0.071]          |                  |                  |
| Proportion of population providing unpaid care                | -0.113             | -1.099***        | -1.008***        | -0.903***        | -0.904***        | -1.150***        |
|                                                               | [0.393]            | [0.161]          | [0.167]          | [0.151]          | [0.155]          | [0.180]          |
| Proportion of population aged 16-74 with no qualifications    | -0.277             |                  |                  |                  |                  |                  |
|                                                               | [0.185]            |                  |                  |                  |                  |                  |
| Proportion of households without a car                        | 0.141              |                  |                  |                  |                  |                  |
|                                                               | [0.136]            |                  |                  |                  |                  |                  |
| Proportion of households that are owner occupied              | -0.179             |                  |                  |                  |                  |                  |
|                                                               | [0.157]            |                  |                  |                  |                  |                  |
| Proportion of households that are one pensioner households    | -0.439*            |                  |                  |                  |                  |                  |
|                                                               | [0.238]            |                  |                  |                  |                  |                  |
| Lone parent households with dependent children                | -0.001             |                  |                  |                  |                  |                  |
|                                                               | [0.112]            |                  |                  |                  |                  |                  |
| Proportion of population aged 16-74 that are permanently sick | 0.326**            | 0.532***         | 0.489***         | 0.471***         | 0.550***         | 0.573***         |
|                                                               | [0.133]            | [0.120]          | [0.124]          | [0.124]          | [0.103]          | [0.116]          |
| Proportion of those aged 16-74 that are long-term unemployed  | 0.046              |                  |                  |                  |                  |                  |
|                                                               | [0.099]            |                  |                  |                  |                  |                  |
| Proportion of those aged 16-74 working agriculture            | -0.070***          | -0.080***        | -0.074***        | -0.066***        | -0.060***        |                  |
|                                                               | [0.021]            | [0.013]          | [0.013]          | [0.012]          | [0.011]          |                  |

|   |                                                            |          |          |          |          |          |          |
|---|------------------------------------------------------------|----------|----------|----------|----------|----------|----------|
| 1 |                                                            |          |          |          |          |          |          |
| 2 | Proportion of those aged 16-74 in professional occupations | -0.339** | -0.100   | -0.052   | -0.115   | -0.105   | -0.008   |
| 3 |                                                            | [0.146]  | [0.095]  | [0.096]  | [0.098]  | [0.096]  | [0.100]  |
| 4 | IMD 2010 Squared                                           |          |          | 0.133**  | 0.132**  | 0.129**  | 0.204*** |
| 5 |                                                            |          |          | [0.064]  | [0.059]  | [0.060]  | [0.064]  |
| 6 | Constant                                                   | 2.542**  | 2.020*** | 3.146*** | 3.191*** | 3.658*** | 3.929*** |
| 7 |                                                            | [1.116]  | [0.578]  | [0.829]  | [0.804]  | [0.683]  | [0.753]  |
| 8 | Observations                                               | 151      | 151      | 151      | 151      | 151      | 151      |

9 Robust standard errors in brackets  
 10 \*\*\* p<0.01, \*\* p<0.05, \* p<0.1

For peer review only

11  
12  
13  
14  
15  
16  
17  
18  
19  
20  
21  
22  
23  
24  
25  
26  
27  
28  
29  
30  
31  
32  
33  
34  
35  
36  
37  
38  
39  
40  
41  
42  
43  
44  
45  
46

1  
2 *With both the public health grant and healthcare as the expenditure variables: backward selection*  
3  
4 Estimation of equation (1) with both public health and healthcare expenditure as endogenous  
5 regressors generates the result shown in column 1 of table A3. This specification includes five  
6 instruments (two for public health expenditure and three for healthcare expenditure). The  
7 corresponding first-stage results can be found in column 1 (for public health) and in column 2 (for  
8 healthcare) in table A4.  
9  
10  
11  
12  
13

14 Some authors have expressed concern about the inclusion of weak instruments,<sup>4</sup> and hence we re-  
15 estimate the 'full' specification without the two insignificant MFF instruments (see column 2 of  
16 table A3). Application of the backward selection process generates the more parsimonious result  
17 shown in column 3 but the instrument set is invalid at the 1% level. On checking to see if any of  
18 the deleted variables or their squared values is significant when added as a control to the second-  
19 stage, we found that the 'permanently sick' variable squared is both significant and resolves the  
20 weak instrument issue for healthcare expenditure. Again in the interests of clarity, we tried re-  
21 estimating the specification in column 4 without the 'white ethnicity' variable. This generates the  
22 plausible result shown in column 5 where both expenditure variables have the anticipated negative  
23 association with mortality, they are endogenous, the instrument set is valid, and the instrument sets  
24 for both endogenous variables are individually strong (the Sanderson-Windmeijer F-statistics are  
25 around ten or better).  
26  
27  
28  
29  
30  
31  
32  
33  
34  
35  
36  
37  
38  
39  
40  
41  
42  
43  
44  
45  
46  
47  
48  
49  
50  
51  
52  
53  
54  
55  
56  
57  
58  
59  
60

Table A3 Derivation of preferred specification for public health expenditure with healthcare expenditure, backward selection, 2013/14

|                                                               | (1)                    | (2)                    | (3)                    | (4)                    | (5)                    |
|---------------------------------------------------------------|------------------------|------------------------|------------------------|------------------------|------------------------|
|                                                               | All causes             |
|                                                               | 2013/14 PH & PB spend  |
|                                                               | SYLLR 2013/14/15       |
|                                                               | outcome model          |
|                                                               | instrument PH&PB spend |
|                                                               | weighted               | weighted               | weighted               | weighted               | weighted               |
|                                                               | IV second stage        |
|                                                               | backward selection     |
|                                                               | full specification     | full specification     | derived specification  | derived specification  | derived specification  |
| VARIABLES                                                     | five instruments       | three instruments      | three instruments      | revised                | revised                |
| Public health spend per person, 2013/14                       | -0.024<br>[0.037]      | -0.052<br>[0.038]      | 0.010<br>[0.033]       | -0.037<br>[0.034]      | -0.081**<br>[0.034]    |
| Healthcare spend per person, 2013/14                          | -0.551<br>[0.413]      | -0.076<br>[0.355]      | -0.869***<br>[0.233]   | -0.662***<br>[0.204]   | -0.672***<br>[0.233]   |
| IMD 2010                                                      | 0.253***<br>[0.062]    | 0.231***<br>[0.078]    | 0.271***<br>[0.067]    | 0.281***<br>[0.063]    | 0.221***<br>[0.063]    |
| Proportion of all residents born outside the EU               | -0.043*<br>[0.024]     | -0.023<br>[0.023]      | -0.054***<br>[0.020]   | -0.042**<br>[0.019]    | -0.084***<br>[0.019]   |
| Proportion of population in white ethnic group                | 0.226***<br>[0.051]    | 0.237***<br>[0.058]    | 0.192***<br>[0.034]    | 0.185***<br>[0.036]    |                        |
| Proportion of population providing unpaid care                | -0.399***<br>[0.144]   | -0.466***<br>[0.165]   | -0.376***<br>[0.099]   | -0.372***<br>[0.096]   | -0.479***<br>[0.096]   |
| Proportion of population aged 16-74 with no qualifications    | -0.111<br>[0.105]      | -0.089<br>[0.124]      |                        |                        |                        |
| Proportion of households without a car                        | -0.033<br>[0.087]      | -0.091<br>[0.083]      |                        |                        |                        |
| Proportion of households that are owner occupied              | 0.090<br>[0.075]       | 0.103<br>[0.074]       |                        |                        |                        |
| Proportion of households that are one pensioner households    | -0.023<br>[0.079]      | -0.035<br>[0.087]      |                        |                        |                        |
| Lone parent households with dependent children                | -0.048<br>[0.082]      | 0.023<br>[0.090]       |                        |                        |                        |
| Proportion of population aged 16-74 that are permanently sick | 0.237***<br>[0.068]    | 0.281***<br>[0.070]    | 0.176**<br>[0.077]     | 0.910***<br>[0.343]    | 1.187***<br>[0.331]    |
| Proportion of those aged 16-74 that are long-term unemployed  | 0.085<br>[0.060]       | 0.069<br>[0.067]       |                        |                        |                        |
| Proportion of those aged 16-74 working agriculture            | -0.007                 | -0.012                 |                        |                        |                        |

|    |                                                                        |           |           |           |           |           |
|----|------------------------------------------------------------------------|-----------|-----------|-----------|-----------|-----------|
| 1  |                                                                        |           |           |           |           |           |
| 2  |                                                                        | [0.013]   | [0.010]   |           |           |           |
| 3  | Proportion of those aged 16-74 in professional occupations             | -0.259*** | -0.243*** | -0.244*** | -0.223*** | -0.194*** |
| 4  |                                                                        | [0.072]   | [0.083]   | [0.039]   | [0.040]   | [0.045]   |
| 5  | Proportion of population aged 16-74 that are permanently sick, squared |           |           |           | 0.111**   | 0.138***  |
| 6  |                                                                        |           |           |           | [0.053]   | [0.052]   |
| 7  | Constant                                                               | 8.714***  | 5.636**   | 10.645*** | 10.605*** | 11.286*** |
| 8  |                                                                        | [2.852]   | [2.502]   | [1.379]   | [1.132]   | [1.409]   |
| 9  | Observations                                                           | 150       | 150       | 150       | 150       | 150       |
| 10 | Endogeneity test statistic                                             | 5.928     | 9.295     | 6.089     | 9.906     | 17.683    |
| 11 | Endogeneity p-value                                                    | 0.052     | 0.010     | 0.048     | 0.007     | 0.000     |
| 12 | Hansen-Sargan test statistic                                           | 20.849    | 9.099     | 6.810     | 6.458     | 1.667     |
| 13 | Hansen-Sargan p-value                                                  | 0.000     | 0.003     | 0.009     | 0.011     | 0.197     |
| 14 | Kleibergen-Paap LM test statistic                                      | 9.027     | 6.363     | 16.219    | 15.540    | 16.034    |
| 15 | Kleibergen-Paap p-value                                                | 0.060     | 0.042     | 0.000     | 0.000     | 0.000     |
| 16 | Kleibergen-Paap F statistic                                            | 2.323     | 2.663     | 9.390     | 8.971     | 8.979     |
| 17 | Pesaran-Taylor reset statistic                                         | 1.405     | 6.440     | 0.528     | 0.330     | 0.175     |
| 18 | Pesaran-Taylor p-value                                                 | 0.236     | 0.011     | 0.467     | 0.565     | 0.676     |
| 19 | Sanderdson-Windmejer Public health spend F-statistic                   | 70.796    | 36.048    | 51.105    | 78.626    | 70.796    |
| 20 | Sanderdson-Windmejer Public health spend p-value                       | 0.000     | 0.000     | 0.000     | 0.000     | 0.000     |
| 21 | Sanderdson-Windmejer Healthcare spend F-statistic                      | 13.469    | 3.008     | 4.288     | 13.427    | 13.469    |
| 22 | Sanderdson-Windmejer Healthcare spend p-value                          | 0.000     | 0.021     | 0.016     | 0.000     | 0.000     |

Robust standard errors in brackets

\*\*\* p<0.01, \*\* p<0.05, \* p<0.1



Table A4 First-stage regression results for derivation of preferred specification for public health expenditure with healthcare expenditure, backward selection, 2013/14

|                                                            | (1)                                                                                                                                                                   | (2)                                                                                                                                                                   | (3)                                                                                                                                                                    | (4)                                                                                                                                                                    | (5)                                                                                                                                                                       | (6)                                                                                                                                                                       | (7)                                                                                                                                                             | (8)                                                                                                                                                             | (9)                                                                                                                                                             | (10)                                                                                                                                                            |
|------------------------------------------------------------|-----------------------------------------------------------------------------------------------------------------------------------------------------------------------|-----------------------------------------------------------------------------------------------------------------------------------------------------------------------|------------------------------------------------------------------------------------------------------------------------------------------------------------------------|------------------------------------------------------------------------------------------------------------------------------------------------------------------------|---------------------------------------------------------------------------------------------------------------------------------------------------------------------------|---------------------------------------------------------------------------------------------------------------------------------------------------------------------------|-----------------------------------------------------------------------------------------------------------------------------------------------------------------|-----------------------------------------------------------------------------------------------------------------------------------------------------------------|-----------------------------------------------------------------------------------------------------------------------------------------------------------------|-----------------------------------------------------------------------------------------------------------------------------------------------------------------|
|                                                            | All causes<br>2013/14 PH spend<br>SYLLR 2013/14/15<br>outcome model<br>first-stage<br>weighted<br>OLS<br>backward selection<br>full specification<br>five instruments | All causes<br>2013/14 PB spend<br>SYLLR 2013/14/15<br>outcome model<br>first-stage<br>weighted<br>OLS<br>backward selection<br>full specification<br>five instruments | All causes<br>2013/14 PH spend<br>SYLLR 2013/14/15<br>outcome model<br>first-stage<br>weighted<br>OLS<br>backward selection<br>full specification<br>three instruments | All causes<br>2013/14 PB spend<br>SYLLR 2013/14/15<br>outcome model<br>first-stage<br>weighted<br>OLS<br>backward selection<br>full specification<br>three instruments | All causes<br>2013/14 PH spend<br>SYLLR 2013/14/15<br>outcome model<br>first-stage<br>weighted<br>OLS<br>backward selection<br>derived specification<br>three instruments | All causes<br>2013/14 PB spend<br>SYLLR 2013/14/15<br>outcome model<br>first-stage<br>weighted<br>OLS<br>backward selection<br>derived specification<br>three instruments | All causes<br>2013/14 PH spend<br>SYLLR 2013/14/15<br>outcome model<br>first-stage<br>weighted<br>OLS<br>backward selection<br>derived specification<br>revised | All causes<br>2013/14 PB spend<br>SYLLR 2013/14/15<br>outcome model<br>first-stage<br>weighted<br>OLS<br>backward selection<br>derived specification<br>revised | All causes<br>2013/14 PH spend<br>SYLLR 2013/14/15<br>outcome model<br>first-stage<br>weighted<br>OLS<br>backward selection<br>derived specification<br>revised | All causes<br>2013/14 PB spend<br>SYLLR 2013/14/15<br>outcome model<br>first-stage<br>weighted<br>OLS<br>backward selection<br>derived specification<br>revised |
| DFT index_Public health_1314                               | 0.727***<br>[0.056]                                                                                                                                                   | -0.029<br>[0.021]                                                                                                                                                     | 0.724***<br>[0.057]                                                                                                                                                    | -0.028<br>[0.022]                                                                                                                                                      | 0.748***<br>[0.054]                                                                                                                                                       | 0.018<br>[0.027]                                                                                                                                                          | 0.750***<br>[0.052]                                                                                                                                             | 0.017<br>[0.028]                                                                                                                                                | 0.746***<br>[0.056]                                                                                                                                             | 0.017<br>[0.028]                                                                                                                                                |
| Healthcare_DFT_index                                       | 0.427<br>[0.437]                                                                                                                                                      | 0.351**<br>[0.138]                                                                                                                                                    | 0.360<br>[0.407]                                                                                                                                                       | 0.410***<br>[0.146]                                                                                                                                                    | 0.715**<br>[0.312]                                                                                                                                                        | 0.614***<br>[0.153]                                                                                                                                                       | 0.548*<br>[0.330]                                                                                                                                               | 0.671***<br>[0.161]                                                                                                                                             | 0.403<br>[0.343]                                                                                                                                                | 0.669***<br>[0.155]                                                                                                                                             |
| Prescribing_Age_index                                      | -1.067***<br>[0.271]                                                                                                                                                  | 0.016<br>[0.083]                                                                                                                                                      | -1.201***<br>[0.263]                                                                                                                                                   | 0.037<br>[0.082]                                                                                                                                                       | -1.490***<br>[0.240]                                                                                                                                                      | 0.208***<br>[0.074]                                                                                                                                                       | -1.380***<br>[0.269]                                                                                                                                            | 0.169**<br>[0.078]                                                                                                                                              | -1.233***<br>[0.242]                                                                                                                                            | 0.172**<br>[0.069]                                                                                                                                              |
| MFF Index_Public health_1314                               | 1.264<br>[1.106]                                                                                                                                                      | 0.490<br>[0.378]                                                                                                                                                      |                                                                                                                                                                        |                                                                                                                                                                        |                                                                                                                                                                           |                                                                                                                                                                           |                                                                                                                                                                 |                                                                                                                                                                 |                                                                                                                                                                 |                                                                                                                                                                 |
| HCHS_MFF_index                                             | -1.921<br>[1.232]                                                                                                                                                     | -0.240<br>[0.388]                                                                                                                                                     |                                                                                                                                                                        |                                                                                                                                                                        |                                                                                                                                                                           |                                                                                                                                                                           |                                                                                                                                                                 |                                                                                                                                                                 |                                                                                                                                                                 |                                                                                                                                                                 |
| IMD 2010                                                   | 0.126<br>[0.137]                                                                                                                                                      | -0.018<br>[0.054]                                                                                                                                                     | 0.179<br>[0.134]                                                                                                                                                       | -0.046<br>[0.055]                                                                                                                                                      | 0.132<br>[0.105]                                                                                                                                                          | 0.028<br>[0.057]                                                                                                                                                          | 0.215*<br>[0.112]                                                                                                                                               | -0.000<br>[0.059]                                                                                                                                               | 0.162<br>[0.116]                                                                                                                                                | -0.001<br>[0.056]                                                                                                                                               |
| Proportion of all residents born outside the EU            | 0.014<br>[0.049]                                                                                                                                                      | -0.034**<br>[0.013]                                                                                                                                                   | 0.003<br>[0.049]                                                                                                                                                       | -0.037***<br>[0.013]                                                                                                                                                   | 0.022<br>[0.033]                                                                                                                                                          | -0.042***<br>[0.013]                                                                                                                                                      | 0.019<br>[0.034]                                                                                                                                                | -0.041***<br>[0.013]                                                                                                                                            | -0.021<br>[0.029]                                                                                                                                               | -0.041***<br>[0.013]                                                                                                                                            |
| Proportion of population in white ethnic group             | 0.284<br>[0.175]                                                                                                                                                      | 0.007<br>[0.041]                                                                                                                                                      | 0.322*<br>[0.182]                                                                                                                                                      | -0.025<br>[0.042]                                                                                                                                                      | 0.239**<br>[0.098]                                                                                                                                                        | -0.007<br>[0.041]                                                                                                                                                         | 0.209*<br>[0.109]                                                                                                                                               | 0.004<br>[0.042]                                                                                                                                                |                                                                                                                                                                 |                                                                                                                                                                 |
| Proportion of population providing unpaid care             | 0.024<br>[0.328]                                                                                                                                                      | -0.029<br>[0.105]                                                                                                                                                     | 0.128<br>[0.344]                                                                                                                                                       | -0.080<br>[0.109]                                                                                                                                                      | -0.123<br>[0.221]                                                                                                                                                         | -0.275***<br>[0.088]                                                                                                                                                      | -0.136<br>[0.222]                                                                                                                                               | -0.270***<br>[0.087]                                                                                                                                            | -0.303<br>[0.199]                                                                                                                                               | -0.273***<br>[0.078]                                                                                                                                            |
| Proportion of population aged 16-74 with no qualifications | -0.212<br>[0.154]                                                                                                                                                     | -0.055<br>[0.063]                                                                                                                                                     | -0.252<br>[0.157]                                                                                                                                                      | -0.048<br>[0.064]                                                                                                                                                      |                                                                                                                                                                           |                                                                                                                                                                           |                                                                                                                                                                 |                                                                                                                                                                 |                                                                                                                                                                 |                                                                                                                                                                 |
| Proportion of households without a car                     | 0.095<br>[0.137]                                                                                                                                                      | 0.124***<br>[0.039]                                                                                                                                                   | 0.082<br>[0.140]                                                                                                                                                       | 0.112***<br>[0.040]                                                                                                                                                    |                                                                                                                                                                           |                                                                                                                                                                           |                                                                                                                                                                 |                                                                                                                                                                 |                                                                                                                                                                 |                                                                                                                                                                 |
| Proportion of households that are owner occupied           | -0.042<br>[0.127]                                                                                                                                                     | -0.000<br>[0.049]                                                                                                                                                     | -0.057<br>[0.123]                                                                                                                                                      | -0.036<br>[0.047]                                                                                                                                                      |                                                                                                                                                                           |                                                                                                                                                                           |                                                                                                                                                                 |                                                                                                                                                                 |                                                                                                                                                                 |                                                                                                                                                                 |
| Proportion of h'holds that are one pensioner households    | -0.052<br>[0.283]                                                                                                                                                     | 0.080<br>[0.057]                                                                                                                                                      | -0.042<br>[0.268]                                                                                                                                                      | 0.073<br>[0.060]                                                                                                                                                       |                                                                                                                                                                           |                                                                                                                                                                           |                                                                                                                                                                 |                                                                                                                                                                 |                                                                                                                                                                 |                                                                                                                                                                 |
| Lone parent households with dependent children             | -0.010<br>[0.116]                                                                                                                                                     | -0.162***<br>[0.037]                                                                                                                                                  | -0.061<br>[0.103]                                                                                                                                                      | -0.143***<br>[0.037]                                                                                                                                                   |                                                                                                                                                                           |                                                                                                                                                                           |                                                                                                                                                                 |                                                                                                                                                                 |                                                                                                                                                                 |                                                                                                                                                                 |
| Proportion of aged 16-74 that are permanently sick         | 0.342***<br>[0.128]                                                                                                                                                   | 0.030<br>[0.055]                                                                                                                                                      | 0.331**<br>[0.128]                                                                                                                                                     | 0.034<br>[0.057]                                                                                                                                                       | 0.487***<br>[0.124]                                                                                                                                                       | 0.030<br>[0.066]                                                                                                                                                          | 1.285**<br>[0.572]                                                                                                                                              | -0.246<br>[0.217]                                                                                                                                               | 1.542***<br>[0.492]                                                                                                                                             | -0.242<br>[0.207]                                                                                                                                               |
| Proportion of those 16-74 that are long-term unemployed    | 0.055<br>[0.084]                                                                                                                                                      | 0.089***<br>[0.033]                                                                                                                                                   | 0.056<br>[0.086]                                                                                                                                                       | 0.093***<br>[0.033]                                                                                                                                                    |                                                                                                                                                                           |                                                                                                                                                                           |                                                                                                                                                                 |                                                                                                                                                                 |                                                                                                                                                                 |                                                                                                                                                                 |
| Proportion of those aged 16-74 working agriculture         | -0.038*<br>[0.019]                                                                                                                                                    | 0.019***<br>[0.006]                                                                                                                                                   | -0.034*<br>[0.019]                                                                                                                                                     | 0.015**<br>[0.006]                                                                                                                                                     |                                                                                                                                                                           |                                                                                                                                                                           |                                                                                                                                                                 |                                                                                                                                                                 |                                                                                                                                                                 |                                                                                                                                                                 |
| Proportion of those aged 16-74 in professional occupations | -0.298**<br>[0.132]                                                                                                                                                   | -0.097**<br>[0.047]                                                                                                                                                   | -0.351**<br>[0.135]                                                                                                                                                    | -0.069<br>[0.047]                                                                                                                                                      | -0.157*<br>[0.092]                                                                                                                                                        | -0.063*<br>[0.037]                                                                                                                                                        | -0.105<br>[0.102]                                                                                                                                               | -0.081**<br>[0.038]                                                                                                                                             | -0.079<br>[0.104]                                                                                                                                               | -0.080**<br>[0.037]                                                                                                                                             |
| Proportion of 16-74 that are permanently sick, squared     |                                                                                                                                                                       |                                                                                                                                                                       |                                                                                                                                                                        |                                                                                                                                                                        |                                                                                                                                                                           |                                                                                                                                                                           | 0.132                                                                                                                                                           | -0.046                                                                                                                                                          | 0.161**                                                                                                                                                         | -0.045                                                                                                                                                          |

|              |                     |                     |                     |                     |                     |                     |                                |                                |                                |                                |
|--------------|---------------------|---------------------|---------------------|---------------------|---------------------|---------------------|--------------------------------|--------------------------------|--------------------------------|--------------------------------|
| Constant     | 3.987***<br>[1.015] | 7.244***<br>[0.401] | 3.774***<br>[1.017] | 7.249***<br>[0.399] | 4.584***<br>[0.680] | 6.254***<br>[0.347] | [0.089]<br>5.539***<br>[0.886] | [0.034]<br>5.923***<br>[0.438] | [0.080]<br>5.737***<br>[0.854] | [0.033]<br>5.927***<br>[0.428] |
| Observations | 150                 | 150                 | 150                 | 150                 | 150                 | 150                 | 150                            | 150                            | 150                            | 150                            |

Robust standard errors in brackets  
 \*\*\* p<0.01, \*\* p<0.05, \* p<0.1

For peer review only

1  
2  
3  
4  
5  
6  
7  
8  
9  
10  
11  
12  
13  
14  
15  
16  
17  
18  
19  
20  
21  
22  
23  
24  
25  
26  
27  
28  
29  
30  
31  
32  
33  
34  
35  
36  
37  
38  
39  
40  
41  
42  
43  
44  
45  
46  
47  
48  
49  
50  
51  
52  
53  
54  
55  
56  
57  
58  
59  
60

*With both the public health grant and healthcare as the expenditure variables: forward selection*

The use of backward selection to identify relevant covariates when theory provides little guidance does not always meet with universal approval, and hence we also report results using forward selection (see table A5 for the second-stage and table A6 for the first-stage results). Column 1 of table A5 shows the result with the inclusion of the most significant single control ('permanently sick') with the same five instruments from the 'full' specification in table A3. The Hansen-Sargan test statistic suggests that the instrument set is not valid and, in response to this, we re-estimate without the two insignificant MFF instruments. This re-estimation (see column 2, table A5) largely resolves the instrument validity issue. Further re-estimation, with the inclusion of additional significant controls, generates the results shown in columns 3, 4 and 5. No further additional significant controls could be found and, as the result in column 5 is both in line with both our theoretical priors and passes the appropriate statistical tests, this is our preferred specification using forward selection.

peer review only

Table A5 Derivation of preferred specification for public health expenditure with healthcare expenditure, forward selection, 2013/14

|                                                               | (1)                    | (2)                    | (3)                    | (4)                    | (5)                    |
|---------------------------------------------------------------|------------------------|------------------------|------------------------|------------------------|------------------------|
|                                                               | All causes             |
|                                                               | 2013/14 PH & PB spend  |
|                                                               | SYLLR 2013/14/15       |
|                                                               | outcome model          |
|                                                               | instrument PH&PB spend |
|                                                               | weighted               | weighted               | weighted               | weighted               | weighted               |
|                                                               | IV second stage        |
|                                                               | forward selection      |
|                                                               | round 1                | round 1                | round 2                | round 3                | round 4                |
| VARIABLES                                                     | five instruments       | three instruments      | three instruments      | three instruments      | three instruments      |
| Public health spend per person, 2013/14                       | -0.006<br>[0.025]      | -0.004<br>[0.028]      | -0.128***<br>[0.040]   | -0.107***<br>[0.041]   | -0.144***<br>[0.040]   |
| Healthcare spend per person, 2013/14                          | -1.012***<br>[0.244]   | -1.394***<br>[0.266]   | -0.949***<br>[0.238]   | -1.190***<br>[0.263]   | -0.837***<br>[0.269]   |
| Proportion of population aged 16-74 that are permanently sick | 0.554***<br>[0.031]    | 0.603***<br>[0.035]    | 0.697***<br>[0.046]    | 0.707***<br>[0.046]    | 0.601***<br>[0.051]    |
| Proportion of population providing unpaid care                |                        |                        | -0.289***<br>[0.081]   | -0.571***<br>[0.134]   | -0.547***<br>[0.122]   |
| Proportion of all residents born outside the EU               |                        |                        |                        | -0.059***<br>[0.021]   | -0.070***<br>[0.019]   |
| Proportion of those aged 16-74 that are long-term unemployed  |                        |                        |                        |                        | 0.156***<br>[0.040]    |
| Constant                                                      | 15.008***<br>[1.756]   | 17.848***<br>[1.913]   | 14.831***<br>[1.719]   | 15.692***<br>[1.742]   | 13.666***<br>[1.762]   |
| Observations                                                  | 150                    | 150                    | 150                    | 150                    | 150                    |
| Endogeneity test statistic                                    | 6.137                  | 17.111                 | 21.226                 | 20.194                 | 22.853                 |
| Endogeneity p-value                                           | 0.046                  | 0.000                  | 0.000                  | 0.000                  | 0.000                  |
| Hansen-Sargan test statistic                                  | 23.780                 | 2.997                  | 0.032                  | 1.702                  | 1.465                  |
| Hansen-Sargan p-value                                         | 0.000                  | 0.083                  | 0.857                  | 0.192                  | 0.226                  |
| Kleibergen-Paap LM test statistic                             | 24.002                 | 19.635                 | 19.756                 | 17.814                 | 18.331                 |
| Kleibergen-Paap p-value                                       | 0.000                  | 0.000                  | 0.000                  | 0.000                  | 0.000                  |
| Kleibergen-Paap F statistic                                   | 7.220                  | 10.806                 | 12.647                 | 11.051                 | 11.627                 |
| Pesaran-Taylor reset statistic                                | 0.073                  | 0.054                  | 0.069                  | 0.005                  | 0.466                  |
| Pesaran-Taylor p-value                                        | 0.788                  | 0.816                  | 0.793                  | 0.946                  | 0.495                  |

|   |                                                      |         |         |        |        |        |
|---|------------------------------------------------------|---------|---------|--------|--------|--------|
| 1 |                                                      |         |         |        |        |        |
| 2 | Sanderdson-Windmejer Public health spend F-statistic | 100.608 | 183.202 | 76.326 | 66.169 | 57.002 |
| 3 | Sanderdson-Windmejer Public health spend p-value     | 0.000   | 0.000   | 0.000  | 0.000  | 0.000  |
| 4 | Sanderdson-Windmejer Healthcare spend F-statistic    | 9.052   | 16.288  | 19.070 | 16.633 | 17.375 |
| 5 | Sanderdson-Windmejer Healthcare spend p-value        | 0.000   | 0.000   | 0.000  | 0.000  | 0.000  |

6 Robust standard errors in brackets

7 \*\*\* p<0.01, \*\* p<0.05, \* p<0.1

8

9

10

11

12

13

14

15

16

17

18

19

20

21

22

23

24

25

26

27

28

29

30

31

32

33

34

35

36

37

38

39

40

41

42

43

44

45

46

For peer review only

Table A6 First-stage regression results for derivation of preferred specification for public health expenditure with healthcare expenditure, forward selection, 2013/14

|                                                   | (1)                  | (2)                 | (3)                  | (4)                 | (5)                  | (6)                  | (7)                  | (8)                  | (9)                  | (10)                 |
|---------------------------------------------------|----------------------|---------------------|----------------------|---------------------|----------------------|----------------------|----------------------|----------------------|----------------------|----------------------|
|                                                   | All causes           | All causes          | All causes           | All causes          | All causes           | All causes           | All causes           | All causes           | All causes           | All causes           |
|                                                   | 2013/14 PH spend     | 2013/14 PB spend    | 2013/14 PH spend     | 2013/14 PB spend    | 2013/14 PH spend     | 2013/14 PB spend     | 2013/14 PH spend     | 2013/14 PB spend     | 2013/14 PH spend     | 2013/14 PB spend     |
|                                                   | SYLLR 2013/14/15     | SYLLR 2013/14/15    | SYLLR 2013/14/15     | SYLLR 2013/14/15    | SYLLR 2013/14/15     | SYLLR 2013/14/15     | SYLLR 2013/14/15     | SYLLR 2013/14/15     | SYLLR 2013/14/15     | SYLLR 2013/14/15     |
|                                                   | outcome model        | outcome model       | outcome model        | outcome model       | outcome model        | outcome model        | outcome model        | outcome model        | outcome model        | outcome model        |
|                                                   | first-stage          | first-stage         | first-stage          | first-stage         | first-stage          | first-stage          | first-stage          | first-stage          | first-stage          | first-stage          |
|                                                   | weighted             | weighted            | weighted             | weighted            | weighted             | weighted             | weighted             | weighted             | weighted             | weighted             |
|                                                   | OLS                  | OLS                 | OLS                  | OLS                 | OLS                  | OLS                  | OLS                  | OLS                  | OLS                  | OLS                  |
|                                                   | forward selection    | forward selection   | forward selection    | forward selection   | forward selection    | forward selection    | forward selection    | forward selection    | forward selection    | forward selection    |
|                                                   | round 1              | round 1             | round 1              | round 1             | round 2              | round 2              | round 3              | round 3              | round 4              | round 4              |
| VARIABLES                                         | five instruments     | five instruments    | three instruments    | three instruments   | three instruments    | three instruments    | three instruments    | three instruments    | three instruments    | three instruments    |
| DFT index_Public health_1314                      | 0.729***<br>[0.055]  | 0.025<br>[0.026]    | 0.728***<br>[0.056]  | 0.026<br>[0.026]    | 0.725***<br>[0.058]  | 0.024<br>[0.025]     | 0.723***<br>[0.061]  | 0.009<br>[0.025]     | 0.715***<br>[0.059]  | 0.007<br>[0.026]     |
| MFF Index_Public health_1314                      | 0.832<br>[1.006]     | 0.550<br>[0.416]    |                      |                     |                      |                      |                      |                      |                      |                      |
| Healthcare_DFT_index                              | 0.633**<br>[0.291]   | 0.579***<br>[0.127] | 0.504*<br>[0.272]    | 0.552***<br>[0.116] | 0.373<br>[0.279]     | 0.457***<br>[0.119]  | 0.383<br>[0.277]     | 0.526***<br>[0.114]  | 0.447<br>[0.285]     | 0.542***<br>[0.115]  |
| Prescribing_Age_index                             | -1.591***<br>[0.146] | 0.143**<br>[0.059]  | -1.530***<br>[0.095] | 0.147***<br>[0.039] | -1.326***<br>[0.199] | 0.296***<br>[0.068]  | -1.338***<br>[0.228] | 0.206***<br>[0.067]  | -1.263***<br>[0.235] | 0.225***<br>[0.070]  |
| HCHS_MFF_index                                    | -1.335<br>[1.119]    | -0.729<br>[0.450]   |                      |                     |                      |                      |                      |                      |                      |                      |
| Proportion of 16-74 that are permanently sick     | 0.639***<br>[0.049]  | 0.065***<br>[0.018] | 0.673***<br>[0.030]  | 0.073***<br>[0.012] | 0.711***<br>[0.042]  | 0.101***<br>[0.016]  | 0.710***<br>[0.044]  | 0.094***<br>[0.015]  | 0.654***<br>[0.054]  | 0.080***<br>[0.022]  |
| Proportion of population providing unpaid care    |                      |                     |                      |                     | -0.260<br>[0.193]    | -0.189***<br>[0.067] | -0.268<br>[0.193]    | -0.250***<br>[0.069] | -0.304<br>[0.193]    | -0.259***<br>[0.071] |
| Proportion of all residents born outside the EU   |                      |                     |                      |                     |                      |                      | -0.004<br>[0.026]    | -0.030***<br>[0.010] | -0.016<br>[0.027]    | -0.033***<br>[0.011] |
| Proportion of 16-74 that are long-term unemployed |                      |                     |                      |                     |                      |                      |                      |                      | 0.091<br>[0.058]     | 0.023<br>[0.028]     |
| Constant                                          | 5.844***<br>[0.157]  | 7.257***<br>[0.057] | 5.958***<br>[0.096]  | 7.286***<br>[0.040] | 5.490***<br>[0.357]  | 6.945***<br>[0.125]  | 5.458***<br>[0.388]  | 6.708***<br>[0.146]  | 5.534***<br>[0.395]  | 6.727***<br>[0.144]  |
| Observations                                      | 150                  | 150                 | 150                  | 150                 | 150                  | 150                  | 150                  | 150                  | 150                  | 150                  |

Robust standard errors in brackets  
 \*\*\* p<0.01, \*\* p<0.05, \* p<0.1

## References for appendices

1. NHS England (2015). 2013-14 CCG Programme Budgeting Benchmarking Tool. Available from <https://www.england.nhs.uk/prog-budgeting/> [accessed 08 January, 2019].
2. DH (2018). Personal communication, 07 November.
3. Andrews, M. et al., 2017. Inference in the presence of redundant moment conditions and the impact of government health expenditure on health outcomes in England. *Econometric Reviews*, 36(1–3), pp.23–41. Available at: <https://www.tandfonline.com/doi/full/10.1080/07474938.2016.1114205> [Accessed July 24, 2017].
4. Small, D.S. (2007). Sensitivity analysis for instrumental variables regression with overidentifying restrictions. *Journal of the American Statistical Association* **102**(479), 1049-1058.

STROBE Statement—Checklist of items that should be included in reports of *cross-sectional studies*

|                              | Item No | Recommendation                                                                                                                                                                                    | Page No |
|------------------------------|---------|---------------------------------------------------------------------------------------------------------------------------------------------------------------------------------------------------|---------|
| <b>Title and abstract</b>    | 1       | (a) Indicate the study's design with a commonly used term in the title or the abstract                                                                                                            | 1, 3    |
|                              |         | (b) Provide in the abstract an informative and balanced summary of what was done and what was found                                                                                               | 3       |
| <b>Introduction</b>          |         |                                                                                                                                                                                                   |         |
| Background/rationale         | 2       | Explain the scientific background and rationale for the investigation being reported                                                                                                              | 5-6     |
| Objectives                   | 3       | State specific objectives, including any prespecified hypotheses                                                                                                                                  | 5-6     |
| <b>Methods</b>               |         |                                                                                                                                                                                                   |         |
| Study design                 | 4       | Present key elements of study design early in the paper                                                                                                                                           | 5-6     |
| Setting                      | 5       | Describe the setting, locations, and relevant dates, including periods of recruitment, exposure, follow-up, and data collection                                                                   | 6-7     |
| Participants                 | 6       | (a) Give the eligibility criteria, and the sources and methods of selection of participants                                                                                                       | 6-7     |
| Variables                    | 7       | Clearly define all outcomes, exposures, predictors, potential confounders, and effect modifiers. Give diagnostic criteria, if applicable                                                          | 10-11   |
| Data sources/<br>measurement | 8*      | For each variable of interest, give sources of data and details of methods of assessment (measurement). Describe comparability of assessment methods if there is more than one group              | 10-11   |
| Bias                         | 9       | Describe any efforts to address potential sources of bias                                                                                                                                         | 7-9     |
| Study size                   | 10      | Explain how the study size was arrived at                                                                                                                                                         | 10      |
| Quantitative variables       | 11      | Explain how quantitative variables were handled in the analyses. If applicable, describe which groupings were chosen and why                                                                      | 10-11   |
| Statistical methods          | 12      | (a) Describe all statistical methods, including those used to control for confounding                                                                                                             | 7-9     |
|                              |         | (b) Describe any methods used to examine subgroups and interactions                                                                                                                               | None    |
|                              |         | (c) Explain how missing data were addressed                                                                                                                                                       | 10      |
|                              |         | (d) If applicable, describe analytical methods taking account of sampling strategy                                                                                                                | n/a     |
|                              |         | (e) Describe any sensitivity analyses                                                                                                                                                             | 11-14   |
| <b>Results</b>               |         |                                                                                                                                                                                                   |         |
| Participants                 | 13*     | (a) Report numbers of individuals at each stage of study—eg numbers potentially eligible, examined for eligibility, confirmed eligible, included in the study, completing follow-up, and analysed | Table 2 |
|                              |         | (b) Give reasons for non-participation at each stage                                                                                                                                              | 10      |
|                              |         | (c) Consider use of a flow diagram                                                                                                                                                                | n/a     |
| Descriptive data             | 14*     | (a) Give characteristics of study participants (eg demographic, clinical, social) and information on exposures and potential confounders                                                          | Table 1 |
|                              |         | (b) Indicate number of participants with missing data for each variable of interest                                                                                                               | 10      |
| Outcome data                 | 15*     | Report numbers of outcome events or summary measures                                                                                                                                              | 10-11   |



1  
2  
3  
4  
5  
6  
7  
8  
9  
10  
11  
12  
13  
14  
15  
16  
17  
18  
19  
20  
21  
22  
23  
24  
25  
26  
27  
28  
29  
30  
31  
32  
33  
34  
35  
36  
37  
38  
39  
40  
41  
42  
43  
44  
45  
46  
47  
48  
49  
50  
51  
52  
53  
54  
55  
56  
57  
58  
59  
60

|                          |    |                                                                                                                                                                                                              |                 |
|--------------------------|----|--------------------------------------------------------------------------------------------------------------------------------------------------------------------------------------------------------------|-----------------|
| Main results             | 16 | (a) Give unadjusted estimates and, if applicable, confounder-adjusted estimates and their precision (eg, 95% confidence interval). Make clear which confounders were adjusted for and why they were included | 11-14 & Table 2 |
|                          |    | (b) Report category boundaries when continuous variables were categorized                                                                                                                                    | n/a             |
|                          |    | (c) If relevant, consider translating estimates of relative risk into absolute risk for a meaningful time period                                                                                             | n/a             |
| Other analyses           | 17 | Report other analyses done—eg analyses of subgroups and interactions, and sensitivity analyses                                                                                                               | 11-14           |
| <b>Discussion</b>        |    |                                                                                                                                                                                                              |                 |
| Key results              | 18 | Summarise key results with reference to study objectives                                                                                                                                                     | 14-15           |
| Limitations              | 19 | Discuss limitations of the study, taking into account sources of potential bias or imprecision. Discuss both direction and magnitude of any potential bias                                                   | 15-16           |
| Interpretation           | 20 | Give a cautious overall interpretation of results considering objectives, limitations, multiplicity of analyses, results from similar studies, and other relevant evidence                                   | 14-16           |
| Generalisability         | 21 | Discuss the generalisability (external validity) of the study results                                                                                                                                        | 15-16           |
| <b>Other information</b> |    |                                                                                                                                                                                                              |                 |
| Funding                  | 22 | Give the source of funding and the role of the funders for the present study and, if applicable, for the original study on which the present article is based                                                | 2               |

\*Give information separately for exposed and unexposed groups.

**Note:** An Explanation and Elaboration article discusses each checklist item and gives methodological background and published examples of transparent reporting. The STROBE checklist is best used in conjunction with this article (freely available on the Web sites of PLoS Medicine at <http://www.plosmedicine.org/>, Annals of Internal Medicine at <http://www.annals.org/>, and Epidemiology at <http://www.epidem.com/>). Information on the STROBE Initiative is available at [www.strobe-statement.org](http://www.strobe-statement.org).

# BMJ Open

**Is an ounce of prevention worth a pound of cure?  
A cross-sectional study of the impact of English public  
health grant on mortality and morbidity.**

|                                 |                                                                                                                                                                                        |
|---------------------------------|----------------------------------------------------------------------------------------------------------------------------------------------------------------------------------------|
| Journal:                        | <i>BMJ Open</i>                                                                                                                                                                        |
| Manuscript ID                   | bmjopen-2019-036411.R1                                                                                                                                                                 |
| Article Type:                   | Original research                                                                                                                                                                      |
| Date Submitted by the Author:   | 25-Jul-2020                                                                                                                                                                            |
| Complete List of Authors:       | Martin, Stephen; University of York Department of Economics and Related Studies,<br>Lomas, James; University of York, Centre for Health Economics<br>Claxton, Karl; University of York |
| <b>Primary Subject Heading</b>: | Health economics                                                                                                                                                                       |
| Secondary Subject Heading:      | Health policy, Public health                                                                                                                                                           |
| Keywords:                       | PUBLIC HEALTH, HEALTH ECONOMICS, Health policy < HEALTH SERVICES ADMINISTRATION & MANAGEMENT                                                                                           |
|                                 |                                                                                                                                                                                        |

SCHOLARONE™  
Manuscripts



I, the Submitting Author has the right to grant and does grant on behalf of all authors of the Work (as defined in the below author licence), an exclusive licence and/or a non-exclusive licence for contributions from authors who are: i) UK Crown employees; ii) where BMJ has agreed a CC-BY licence shall apply, and/or iii) in accordance with the terms applicable for US Federal Government officers or employees acting as part of their official duties; on a worldwide, perpetual, irrevocable, royalty-free basis to BMJ Publishing Group Ltd ("BMJ") its licensees and where the relevant Journal is co-owned by BMJ to the co-owners of the Journal, to publish the Work in this journal and any other BMJ products and to exploit all rights, as set out in our [licence](#).

The Submitting Author accepts and understands that any supply made under these terms is made by BMJ to the Submitting Author unless you are acting as an employee on behalf of your employer or a postgraduate student of an affiliated institution which is paying any applicable article publishing charge ("APC") for Open Access articles. Where the Submitting Author wishes to make the Work available on an Open Access basis (and intends to pay the relevant APC), the terms of reuse of such Open Access shall be governed by a Creative Commons licence – details of these licences and which [Creative Commons](#) licence will apply to this Work are set out in our licence referred to above.

Other than as permitted in any relevant BMJ Author's Self Archiving Policies, I confirm this Work has not been accepted for publication elsewhere, is not being considered for publication elsewhere and does not duplicate material already published. I confirm all authors consent to publication of this Work and authorise the granting of this licence.

1  
2  
3 **Is an ounce of prevention worth a pound of cure?**  
4 **A cross-sectional study of the impact of English public health grant on**  
5 **mortality and morbidity**  
6  
7  
8  
9

10 Author/position/address

11 Dr Stephen Martin

12 Research Fellow, Department of Economics, University of York, York, YO10 5DD.  
13  
14

15 Dr James Lomas

16 Research Fellow, Centre for Health Economics, University of York, York, YO10 5DD.  
17  
18

19 Karl Claxton

20 Professor, Department of Economics & Centre for Health Economics, University of York,  
21 York, YO10 5DD.  
22  
23  
24

25 Corresponding author and email address

26 Dr Stephen Martin Email: [sdm1@york.ac.uk](mailto:sdm1@york.ac.uk)  
27  
28

29 Copyright statement

30 The Corresponding Author has the right to grant on behalf of all authors and does grant on  
31 behalf of all authors, an exclusive licence (or non exclusive for government employees) on a  
32 worldwide basis to the BMJ Publishing Group Ltd to permit this article (if accepted) to be  
33 published in BMJ editions and any other BMJ PGL products and sublicences such use and  
34 exploit all subsidiary rights, as set out in our licence.  
35  
36  
37  
38

39 Competing interest statement

40 All authors have completed the Unified Competing Interest form (available on request from  
41 the corresponding author) and declare: financial support from the National Institute for  
42 Health Research Policy Research Programme for the submitted work; no financial  
43 relationships with any organisations that might have an interest in the submitted work in the  
44 previous three years; and no other relationships or activities that could appear to have  
45 influenced the submitted work.  
46  
47  
48

49 Contributors

50 All (SM, JL and KC) authors contributed to the concept and design of this paper. SM led on  
51 the analysis and drafting, and the final paper was edited and approved by all three authors.  
52 The corresponding author attests that all listed authors meet authorship criteria and that no  
53 others meeting these criteria have been omitted. SM is the paper's guarantor.  
54  
55  
56  
57  
58  
59  
60

### Transparency declaration

The lead author (the manuscript's guarantor) affirms that the manuscript is an honest, accurate, and transparent account of the study being reported; that no important aspects of the study have been omitted; and that any discrepancies from the study as planned have been explained.

### Details of ethical approval

Ethical approval was not required because neither human participants nor animals were involved in the study.

### Details of funding

This paper reports independent research funded by the National Institute for Health Research Policy Research Programme (NIHR PRP) through its Policy Research Unit in Economic Evaluation of Health & Care Interventions (EEPRU, grant reference 104/0001).

### Details of the role of the study sponsors

The views expressed in this publication are those of the authors and not necessarily those of the NHS, the National Institute for Health Research or the Department of Health and Social Care (DHSC).

### Statement of independence of researchers from funders

Although funded by the DHSC, the Department had no influence on the study design, the way in which the research was undertaken, or the results.

### Patient and public involvement statement

Neither patients nor the public were involved in the design, or conduct, or reporting, or dissemination of our research.

### Acknowledgements

We should like to thank NHS Digital for supplying the mortality data. We should also like to acknowledge the assistance received from various individuals including Michael Chaplin at the Department of Health and Social Care and Professor Brian Ferguson and Scott Mahony at Public Health England. In addition, we should like to acknowledge the comments received from various individuals at the Department of Health and Social Care on an earlier version of this paper. Their suggestions have substantially improved the final version. Finally, we acknowledge fruitful discussions with Francesco Longo and Noemi Kreif, and helpful feedback received at a presentation of this paper in February 2020 from analysts at Public Health England and the Department of Health and Social Care.

### Data sharing statement

All of the raw data are in the public domain. The healthcare expenditure data are available in the 2013-14 CCG Programme Budgeting Benchmarking Tool. This is available from <https://www.england.nhs.uk/prog-budgeting/> [accessed 14 July, 2020]. The socio-economic variables have been constructed from the 2011 Population Census. These are available from

1  
2  
3 the Office for National Statistics at  
4 <https://www.ons.gov.uk/peoplepopulationandcommunity/populationandmigration/population>  
5 [estimates/datasets/2011censuskeystatisticsforlocalauthoritiesinenglandandwales](https://www.ons.gov.uk/peoplepopulationandcommunity/populationandmigration/population) [accessed 14  
6 July, 2020]. The public health expenditure data are available from ‘Local authority revenue  
7 expenditure and financing England: 2013 to 2014 individual local authority data – outturn’  
8 which is available from <https://www.gov.uk/government/statistics/local-authority-revenue->  
9 [expenditure-and-financing-england-2013-to-2014-individual-local-authority-data-outturn](https://www.gov.uk/government/statistics/local-authority-revenue-)  
10 [accessed 14 July, 2020]’. The instruments for public health expenditure are available in  
11 ‘Exposition Book Public Health Allocations 2013-14 and 2014-15: Technical Guide’ and this  
12 is available from  
13 [https://assets.publishing.service.gov.uk/government/uploads/system/uploads/attachment\\_data](https://assets.publishing.service.gov.uk/government/uploads/system/uploads/attachment_data)  
14 [/file/213324/Public-Health-Weighted-Capitation-FormulaTechnical-Guide-v0.13.pdf](https://assets.publishing.service.gov.uk/government/uploads/system/uploads/attachment_data)  
15 [accessed 14 July, 2020]. The DFT variable for healthcare expenditure is available from the  
16 Department of Health’s website at <https://www.networks.nhs.uk/nhsnetworks/health->  
17 [investment-network/news/2012-13-programme-budgeting-data-is-now-available](https://www.networks.nhs.uk/nhsnetworks/health-) [accessed 14  
18 July, 2020], and the MFF and prescribing cost age indices are available from the exposition  
19 books for the 2011/12 allocations at <https://www.gov.uk/government/publications/exposition->  
20 [book-2011-2012](https://www.gov.uk/government/publications/exposition-) [accessed 14 July, 2020].  
21  
22  
23  
24  
25  
26  
27  
28  
29

30 Similarities between the present paper and the paper available at  
31 [https://www.york.ac.uk/media/che/documents/papers/researchpapers/CHERP166\\_Impact\\_Pu](https://www.york.ac.uk/media/che/documents/papers/researchpapers/CHERP166_Impact_Public_Health_Mortality_Morbidity.pdf)  
32 [blic\\_Health\\_Mortality\\_Morbidity.pdf](https://www.york.ac.uk/media/che/documents/papers/researchpapers/CHERP166_Impact_Public_Health_Mortality_Morbidity.pdf).  
33

34 The initial version of the submitted paper was re-written for a much wider audience with  
35 most of the more technical material moved to appendices. The revised version of the  
36 submitted paper has also benefitted from important changes prompted by the reviewers’  
37 comments on the initial submission.  
38  
39  
40

#### 41 Word count

42 The text consists of 5,035 words. There are three tables in this document. There are also two  
43 figures each in a separate file.  
44  
45  
46  
47  
48  
49  
50  
51  
52  
53  
54  
55  
56  
57  
58  
59  
60

1  
2  
3  
4  
5  
6  
7  
8

# Is an ounce of prevention worth a pound of cure?

## A cross-sectional study of the impact of English public health grant on mortality and morbidity

9  
10

### Abstract

11  
12

#### *Objectives*

13 The UK government is proposing to cease cutting the local authority public health grant by  
14 re-allocating part of the treatment budget to preventative activity. This study examines  
15 whether this proposal is evidenced-based and, in particular, whether these resources are best  
16 re-allocated to prevention, or whether this expenditure would generate more health gains if  
17 used for treatment.  
18  
19

20  
21

#### *Methods*

22 Instrumental variable regression methods are applied to English local authority data on  
23 mortality, healthcare and public health expenditure to estimate the responsiveness of  
24 mortality to variations in healthcare and public health expenditure in 2013/14. Using a well-  
25 established method, these mortality results are converted to a quality-adjusted life year  
26 (QALY) basis, and this facilitates the estimation of the cost per QALY for both National  
27 Health Service (NHS) healthcare and local public health expenditure.  
28  
29  
30

31  
32

#### *Results*

33 Saving lives and improving the quality of life requires resources. Our estimates suggest that  
34 each additional quality-adjusted life year (QALY) costs about £3,800 from the local public  
35 health budget, and that each additional QALY from the NHS budget costs about £13,500.  
36 These estimates can be used to calculate the number of QALYs generated by a budget boost.  
37 If we err on the side of caution and use the most conservative estimates that we have, then an  
38 additional £1bn spent on public health will generate 206,398 QALYs (95% CI 36,591 to  
39 376,205 QALYs), and an additional £1bn spent on healthcare will generate 67,060 QALYs  
40 (95% CI 21,487 to 112,633 QALYs).  
41  
42  
43  
44

45

#### *Conclusions*

46 Additional public health expenditure is very productive of health and is more productive than  
47 additional NHS expenditure. However, both types of expenditure are more productive of  
48 health than the norms used by NICE (£20,000 to £30,000 per QALY) to judge whether new  
49 therapeutic technologies are suitable for adoption by the NHS.  
50  
51  
52  
53  
54  
55  
56  
57  
58  
59  
60

1  
2  
3 Strengths and limitations of this study  
4

- 5
- 6 • Cross-sectional analysis of the impact of public health and healthcare expenditure on mortality.
  - 7 • The endogenous nature of expenditure is accommodated via the use of instrumental variable methods.
  - 8 • The analysis includes controls for the need for healthcare expenditure.
  - 9 • The estimated mortality effects are converted into quality-adjusted life year effects.
  - 10 • There may be other healthcare need factors beyond those included in this study.
- 11  
12  
13  
14  
15  
16  
17  
18  
19  
20  
21  
22  
23  
24  
25  
26  
27  
28  
29  
30  
31  
32  
33  
34  
35  
36  
37  
38  
39  
40  
41  
42  
43  
44  
45  
46  
47  
48  
49  
50  
51  
52  
53  
54  
55  
56  
57  
58  
59  
60

For peer review only



1  
2  
3  
4  
5  
6  
7  
8  
9

# Is an ounce of prevention worth a pound of cure?

## A cross-sectional study of the impact of English public health grant on mortality and morbidity

10

### 1. Introduction

11 The UK's NHS spends about 5% of its annual budget on preventative activity with most of  
12 the remainder on treatment.<sup>1</sup> However, most observers agree that prevention is better than  
13 cure and two recent government publications emphasise the importance of prevention if the  
14 government's target gains in life expectancy by 2035 are to be realised.<sup>2 3 4</sup> The  
15 government's 2019 Spending Review announced that cuts to the public health grant will  
16 cease and that a real-terms increase from 2019/20 to 2020/21 will be achieved by a  
17 reprioritisation within the Department of Health's budget.<sup>5 6</sup> Although there is some debate  
18 about whether the increased funding will even compensate for increased costs,<sup>7</sup> this re-  
19 prioritisation raises the issue of whether these resources are best re-allocated to prevention, or  
20 whether this expenditure would generate more health gains if used for treatment.  
21  
22  
23  
24  
25  
26  
27  
28  
29

30 There is considerable evidence that specific individual preventative interventions generate  
31 substantial health benefits. For example, a study of the cost per quality adjusted life year  
32 (QALY) associated with public health interventions assessed by the National Institute for  
33 Health and Care Excellence (NICE) over two five-year periods reported that the median cost  
34 per QALY was £1,053 between 2005 and 2010, and £7,843 between 2011 and 2016.<sup>8</sup> Both  
35 of these cost per QALY figures are far below the £30,000 threshold that NICE uses for the  
36 approval of new therapeutic treatments within the NHS.<sup>9</sup>  
37  
38  
39  
40  
41  
42  
43

44 Studies of individual public health interventions are useful but, if budgets are re-allocated, we  
45 need to know the health gains associated with the increased spending on public health across  
46 *all* types of investments and the health losses associated with reduced spending on treatment  
47 (again, across *all* programmes that are likely to be curtailed). In other words, we need to  
48 know the health effects at the margin of changes in the totality of the public health and  
49 healthcare budgets.  
50  
51  
52  
53  
54  
55

56 There is some American evidence on the effect of public health expenditure on mortality but  
57 the relevance of this for the UK is limited because the US healthcare system is very different  
58 and these studies do not simultaneously account for the impact of treatment expenditure.<sup>10</sup>  
59  
60

1  
2  
3 There is considerable evidence about the marginal productivity of English NHS healthcare  
4 (treatment) expenditure.<sup>11 12</sup> However, we want to investigate the marginal productivity of  
5 preventative expenditure while simultaneously controlling for treatment expenditure, and the  
6 inclusion of prevention expenditure in the health outcome specification may affect the  
7 estimated marginal productivity of treatment expenditure.  
8  
9  
10  
11  
12

13 Here we exploit the availability of a funding formula for the public health grant. This  
14 determines how much of the total national budget is allocated to each local authority. Some  
15 components of this formula are conditionally exogenous, i.e., they are not related to health  
16 outcomes after controlling for the need for healthcare, except through their influence on the  
17 level of expenditure, and this makes it possible to identify the causal effect of changes in  
18 expenditure on mortality.  
19  
20  
21  
22  
23  
24

25 At the time of this study, the most recent mortality data available at a local level was for  
26 2013/2014/2015 combined, and hence we relate expenditure in 2013/14 to a measure of  
27 mortality for these three years. Moreover, by converting healthcare (treatment) expenditure  
28 as reported by Clinical Commissioning Groups (CCGs) to a local authority geography, we are  
29 also able to estimate a health outcome specification that includes both treatment (healthcare)  
30 and prevention (public health) expenditure. This enables us to identify the relative  
31 contribution of both types of expenditure to reductions in mortality.  
32  
33  
34  
35  
36  
37  
38  
39

## 40 **2. Methods**

### 41 **2.1 Institutional context**

42 The English National Health Service (NHS) is a largely centrally planned and publicly  
43 funded health care system. Its income comes almost entirely from national taxation. Access  
44 to the Service is usually achieved via general practitioners who act as gatekeepers to  
45 secondary care and pharmaceuticals. With some minor exceptions, the service is free at the  
46 point of consumption for patients.  
47  
48  
49  
50  
51  
52  
53

54 The Service is organized geographically, with responsibility for the local management of the  
55 NHS delegated to local health authorities. For our study year (2013/14), each authority  
56 (CCG) was assigned a fixed annual budget by the national ministry (the Department of  
57  
58  
59  
60

1  
2  
3 Health) within which they were supposed to meet expenditure on most types of health care  
4 including inpatient care, outpatient and community care, and pharmaceutical prescriptions.  
5 We use their reported expenditure from the programme budgeting dataset as a measure of  
6 local healthcare expenditure.<sup>13</sup> Primary care, specialised commissioning and *national* public  
7 health programmes were administered centrally. £2,203m was made available for these  
8 nationally funded public health programmes including those for immunisation (eg for  
9 Hepatitis B, BCG, and MMR) and for screening (eg for exposure to HIV and for cervical  
10 cancer).<sup>14</sup>  
11  
12  
13  
14  
15  
16  
17  
18

19 Responsibility for *local* public health was delegated to local government with each ‘unitary’  
20 or upper tier local authority receiving a fixed annual budget, ring-fenced for public health  
21 activities. Here, our focus is on the impact of the local public health grant because we do not  
22 have data for expenditure on national programmes by local area. In 2013/14 local authorities  
23 spent over £2,500m on public health services including £630m on sexual health services (eg  
24 for STI testing and treatment, and for contraception), £800m on substance (drugs and alcohol)  
25 misuse services, £150m on stop smoking and tobacco control services, and £240m on health  
26 programmes for children aged 5-19.<sup>15</sup>  
27  
28  
29  
30  
31  
32  
33

34 We sometimes refer to public health expenditure as ‘preventative’ and CCG healthcare  
35 expenditure as ‘treatment’ (for ill-health). This is more out of a desire to avoid repetition  
36 rather than any belief that all expenditure funded by the public health grant is preventative  
37 and/or that all healthcare expenditure is solely for treatment. For example, some expenditure  
38 from the public health grant could be considered as treatment (eg expenditure on substance  
39 misuse treatment services) and some expenditure by CCGs will be preventative (eg on  
40 medication for blood pressure and blood cholesterol). This issue is discussed further in the  
41 online appendix (see section A1). Strictly speaking, we are comparing the productivity of the  
42 public health grant with CCG healthcare expenditure but we believe that it is reasonable to  
43 think of this as a comparison of the marginal productivity of preventative and treatment  
44 expenditure.  
45  
46  
47  
48  
49  
50  
51  
52  
53  
54

## 55 **2.2 Estimation strategy**

56 Studies estimating the relationship between any form of health expenditure and mortality  
57 typically estimate an outcome equation of the form:  
58

$$59 \ln(\text{mortality rate}) = f[\ln(\text{health expenditure per person})] + \text{controls for need} + e \quad (1)$$

60

1  
2  
3 where expenditure is likely to be endogenous, the controls reflect the need for health  
4 expenditure, and e reflects everything not included elsewhere in the specification.<sup>16 17</sup> We  
5 want to estimate this specification, first with public health as the sole expenditure variable,  
6 and then with both public health and healthcare expenditure as two separate variables.  
7  
8  
9

10  
11 Even after controlling for observable need for health expenditure, estimating the impact of  
12 health expenditure on mortality is challenging for two reasons and these are illustrated in the  
13 top half of Figure 1: first, there might be some reverse causation with historical mortality  
14 influencing the current level of expenditure; and second, there might be some unobserved  
15 factor that is driving both expenditure and mortality. Our estimation approach involves  
16 finding variables (known as ‘instruments’) that are good predictors of expenditure but which  
17 have no direct impact on either mortality or unobserved factors.  
18

19 These instruments are used to predict the level of expenditure that is not influenced by either  
20 historical mortality or unobserved factors. Having severed the link with unobserved factors  
21 and mortality, the *predicted* level of expenditure can then be used in a regression model to  
22 examine the causal impact of expenditure on mortality (bottom half of Figure 1).  
23  
24  
25  
26  
27  
28  
29  
30  
31

32 Insert Figure 1 near here  
33  
34  
35  
36  
37

38 We use the resource allocation formula for the public health grant to local authorities as a  
39 source of instruments for public health expenditure. This formula has three components – for  
40 mandatory services, for non-mandatory services, and for substance misuse services – and  
41 each component has its own formula. Although the precise formula differs for each  
42 component, overall, the public health budget per person can be expressed as:  
43  
44  
45

46 local budget per person= (national budget per person) x (local age index) x  
47 (local additional needs index) x (local input price index) x (local DFT Index) (2)  
48

49 where: (a) the age index reflects the demographic profile of the local population; (b) the  
50 additional needs index reflects local deprivation and other factors likely to influence the need  
51 for public health expenditure; (c) the input price index (MFF) reflects prices in the local  
52 health economy; and (d) the distance from target (DFT) index reflects how far each LA’s  
53 actual budget allocation is from its target allocation.<sup>16</sup> The DFT index reflects the fact that,  
54 periodically, the national ministry revises the funding formula and this, together with routine  
55 data updates, generates a new target budget allocation for each LA. For some LAs, the new  
56  
57  
58  
59  
60

1  
2  
3 funding rule might generate a large change in its target allocation and, to avoid sudden large  
4 reductions in actual allocations (budgets), such changes are phased into actual budgets over a  
5 number of years in accordance with the Department of Health's 'pace of change' policy.<sup>18</sup>  
6  
7  
8  
9

10 Two of the four adjustment factors in equation (2) – the MFF and the DFT – are relevant for  
11 all three components of the public health resource allocation formula for 2013/14. We use  
12 these variables as instruments to predict expenditure, and then estimate the relationship  
13 between this predicted level of expenditure and health outcomes. The MFF and DFT are  
14 valid instruments if they are not related to health outcomes (except through their influence on  
15 expenditure) or an unobserved confounder.<sup>16 17</sup>  
16  
17  
18  
19  
20  
21

22 The local input price index (MFF), which will reflect characteristics of the local (health)  
23 economy, could be correlated with unmeasured determinants of mortality (i.e., an unobserved  
24 confounder). However, we have over a dozen potential socio-economic covariates (including  
25 the Index of Multiple Deprivation) in the baseline mortality equation and hence it is difficult  
26 to imagine what effect the input price index would detect that our covariates do not (see  
27 online appendix A2 for further discussion of this instrument). The DFT variable will largely  
28 reflect: (i) the level of PCT expenditure in 2010/11 associated with those public health  
29 activities that were transferred to local authorities in 2013/14; (ii) the public health grant  
30 funding formula for 2013/14; and (iii) the 'pace of change' policy for the 2013/14 allocations.  
31 The latter two factors will be policy choices but it is not obvious that the resulting DFT will  
32 be endogenous with respect to mortality. Moreover, any correlation between our two  
33 instruments and the error term in equation (1) is likely to be detected by the Hansen-Sargan  
34 test. Hence we use the public health grant MFF and DFT as instruments for public health  
35 expenditure when estimating equation (1).  
36  
37  
38  
39  
40  
41  
42  
43  
44  
45  
46  
47

48 Theory provides little guidance as to the identity of the appropriate controls in equation (1)  
49 so, following previous studies, we identify a dozen socio-economic variables -- such as the  
50 proportion of the working-age population employed in managerial and professional  
51 occupations, and the proportion of owner-occupied households – as potential controls for the  
52 need for public health expenditure.<sup>17</sup> We start by estimating (1) with all socio-economic  
53 variables included as controls. The least significant regressor is removed from the  
54 specification and the equation is re-estimated (backward selection). This process – of  
55 dropping the least significant regressor and re-estimating -- continues until there are only  
56  
57  
58  
59  
60

1  
2  
3 significant controls remaining (the expenditure term is forced to be ever-present). This  
4 specification becomes our preferred result if it also passes the appropriate statistical tests (eg  
5 the instruments are valid and the instruments are strong) but, if this is not the case, the  
6 specification is adjusted (eg an invalid instrument is removed) and the equation re-estimated.  
7  
8 When the specification requires no further adjustment it becomes our preferred specification.  
9  
10  
11  
12

13 Initially equation (1) is estimated using the above strategy with public health as the sole  
14 health expenditure variable. We then re-estimate (1) – again using the above strategy – but  
15 this time including healthcare expenditure as an additional endogenous regressor. This  
16 variable is instrumented in a similar way to public health. Further details of this estimation  
17 process and the instruments for healthcare expenditure are in the online appendix A3. As a  
18 sensitivity analysis, we repeat our estimation strategy using forward selection to identify  
19 relevant controls when we have both public health and healthcare expenditure in the health  
20 outcome equation.  
21  
22  
23  
24  
25  
26  
27  
28

### 29 **2.3 Data**

30 Unitary and upper tier local authorities (n=152) are the unit of analysis in this study but one  
31 of them (the Isles of Scilly) is so small that the mortality data for this authority is rarely  
32 disclosed by the ONS so this leaves 151 authorities for analysis. In addition, the healthcare  
33 expenditure data for one CCG (Wiltshire) for 2013/14 is not available so that, when both  
34 expenditure variables are included in the estimating equation, there are 150 observations for  
35 analysis.  
36  
37  
38  
39  
40  
41  
42

43 With the exception of the CCG healthcare expenditure and the instruments for this variable,  
44 all of the dataset is readily available at the local authority (LA) level. The healthcare  
45 expenditure and instrument data have been converted to a LA basis using a mapper which  
46 uses population levels in mid-2012 to allocate (parts of) CCGs to LAs. As LAs vary greatly  
47 in size, we weight all observations in our analysis by their population size. In addition, we  
48 use the logarithms of all variables in the empirical analysis so that regression coefficients can  
49 be interpreted as elasticities.  
50  
51  
52  
53  
54  
55

56 Table 1 reports descriptive statistics for the variables employed in this study. Average  
57 expenditure per person from the public health grant in 2013/14 was £53 and this varied  
58 between £18 and £186 per person. Average per capita expenditure on healthcare was £1,152.  
59  
60

1  
2  
3 The mortality measure employed in this study is the (age) standardised under 75 years of life  
4 lost rate (SYLLR). This mortality rate varies considerably across the country, ranging  
5 between 267 (City of London) and 776 (Blackpool) years of life lost per 10,000 population.  
6  
7  
8  
9

10 The DFT instrument for public health expenditure averages just over 1.00 but its range  
11 suggests that at least one LA budget is 46% under its target allocation and another LA budget  
12 (the City of London) is 562% above its target allocation. The MFF instrument for public  
13 health expenditure reveals that some LAs face unit costs between 8% lower and 21% higher  
14 than the average. The instruments for healthcare expenditure also reveal considerable  
15 geographic variation with, for example, some LAs being 7% below and others being 23%  
16 above their target allocations.  
17  
18  
19  
20  
21  
22  
23  
24  
25  
26  
27  
28  
29  
30  
31  
32  
33  
34  
35  
36  
37  
38  
39  
40  
41  
42  
43  
44  
45  
46  
47  
48  
49  
50  
51  
52  
53  
54  
55  
56  
57  
58  
59  
60



Table 1 Descriptive statistics for study variables

| Variable description                                                             | Observations | Mean    | Std. Dev. | Minimum | Maximum |
|----------------------------------------------------------------------------------|--------------|---------|-----------|---------|---------|
| <i>Health expenditure variables</i>                                              |              |         |           |         |         |
| Public health grant: expenditure per person, £, 2013/14                          | 152          | 52.6    | 25.2      | 18.5    | 186.2   |
| Healthcare spend per person, £, 2013/14                                          | 151          | 1152.1  | 75.8      | 1019.9  | 1479.1  |
| <i>Mortality variable</i>                                                        |              |         |           |         |         |
| Standardised years of life lost rate, 2013/14/15                                 | 151          | 443.3   | 85.0      | 267.5   | 775.9   |
| <i>Instruments for expenditure</i>                                               |              |         |           |         |         |
| Distance from target (public health)                                             | 152          | 1.0667  | 0.5362    | 0.5392  | 6.6247  |
| Market Forces Factor (public health)                                             | 152          | 1.0122  | 0.0790    | 0.9151  | 1.2076  |
| Distance from target (healthcare: total)                                         | 152          | 1.0055  | 0.0515    | 0.9282  | 1.2250  |
| Age index (healthcare: prescribing)                                              | 152          | 0.9776  | 0.1283    | 0.6422  | 1.3007  |
| Market Forces Factor (healthcare: HCHS)                                          | 152          | 1.0063  | 0.0643    | 0.9319  | 1.1416  |
| <i>Socio-economic controls</i>                                                   |              |         |           |         |         |
| Proportion of all residents born outside the European Union                      | 152          | 0.1281  | 0.1147    | 0.0144  | 0.5060  |
| Proportion of population in white ethnic group                                   | 152          | 0.8364  | 0.1626    | 0.2897  | 0.9882  |
| Proportion of population providing unpaid care                                   | 152          | 0.1008  | 0.0138    | 0.0651  | 0.1289  |
| Proportion of population aged 16-74 with no qualifications                       | 152          | 0.2469  | 0.0606    | 0.0720  | 0.3874  |
| Proportion of households without a car                                           | 152          | 0.2862  | 0.1248    | 0.0899  | 0.6940  |
| Proportion of households that are owner occupied                                 | 152          | 0.6190  | 0.1152    | 0.2611  | 0.8086  |
| Proportion of households that are one pensioner households, 2011                 | 152          | 0.1206  | 0.0208    | 0.0596  | 0.1667  |
| Proportion of households that are lone parent households with dependent children | 152          | 0.0745  | 0.0185    | 0.0208  | 0.1436  |
| Proportion of population aged 16-74 that are permanently sick                    | 152          | 0.0424  | 0.0149    | 0.0086  | 0.0879  |
| Proportion of those aged 16-74 that are long-term unemployed                     | 152          | 0.0183  | 0.0058    | 0.0043  | 0.0367  |
| Proportion of those aged 16-74 in employment that are working agriculture        | 152          | 0.0064  | 0.0099    | 0.0003  | 0.0572  |
| Proportion of those aged 16-74 in managerial and professional occupations        | 152          | 0.3114  | 0.0769    | 0.1835  | 0.6674  |
| Index of multiple deprivation (2010)                                             | 152          | 23.0753 | 8.6040    | 5.4466  | 43.4465 |



1  
2  
3 The dozen potential socio-economic controls for the need for health are also listed in Table 1.  
4 These census-based variables are constructed using the 2011 census. They show that, for  
5 example, on average, 13% of all residents are born outside the European Union, 31% of the  
6 working-age population are employed in managerial and professional occupations, and 62%  
7 of households are owner occupied. Again, these averages mask considerable variation across  
8 local authorities; the proportion of residents born outside the EU varies from less than 2% to  
9 more than 50%, and the extent of owner occupation ranges between 26% and 81% of all  
10 households. Further details about the data can be found elsewhere.<sup>19</sup> All specifications are  
11 estimated using the *ivreg2* command in *Stata*.<sup>20</sup>  
12  
13  
14  
15  
16  
17  
18  
19

#### 20 21 *2.4 Patient and public involvement*

22 Neither patients nor the public were involved in the design, or conduct, or reporting, or  
23 dissemination of our research.  
24  
25

### 26 27 **3. Results**

#### 28 29 *3.1 With the public health grant as the only expenditure variable*

30 Estimation of equation (1) with public health as the sole expenditure variable generates the  
31 result shown in column 1 of table 2. Application of the backward selection process generates  
32 the more parsimonious specification shown in column 2 of table 2. In this, public health  
33 expenditure has a modest but statistically significant negative association with mortality,  
34 expenditure is endogenous, there is no evidence of weak instruments (the Kleibergen-Paap F  
35 statistic exceeds the rule-of-thumb threshold value (=10)), and the specification passes the  
36 reset test. Details of the intermediate estimations associated with this backward selection  
37 process are in the online appendix A4 (see table A1 for the second-stage and table A2 for the  
38 first-stage results).  
39  
40  
41  
42  
43  
44  
45  
46  
47

#### 48 49 *3.2 With both the public health grant and healthcare as the expenditure variables: backward 50 selection*

51 Estimation of equation (1) with both public health and healthcare expenditure as endogenous  
52 regressors generates the result shown in column 3 of table 2. This specification includes five  
53 instruments (two for public health expenditure and three for healthcare expenditure).  
54  
55

56 Application of the backward selection process generates the more parsimonious result shown  
57 in column 4 where both expenditure variables have the anticipated negative association with  
58 mortality, they are endogenous, the instrument set is valid, and the instrument sets for both  
59  
60

1  
2  
3 endogenous variables are individually strong (the Sanderson-Windmeijer F-statistics are  
4 around ten or better). Details of the intermediate estimations associated with the backward  
5 selection process are in the online appendix A4 (see table A3 for the second-stage and table  
6  
7 A4 for the first-stage results).  
8  
9

### 10 11 *3.3 With both the public health grant and healthcare as the expenditure variables: forward* 12 13 *selection* 14

15 The use of backward selection to identify relevant covariates when theory provides little  
16 guidance does not always meet with universal approval, and hence results are also reported  
17 using forward selection (see table 2, columns 5 and 6). Column 5 shows the result with the  
18 inclusion of the most significant single control ('permanently sick') with the same five  
19 instruments from the 'full' specification in column 3. Further re-estimation, with the  
20 inclusion of additional significant controls, generates the result shown in column 6. No  
21 further additional significant controls could be found and, as the result in column 6 is both in  
22 line with both our theoretical priors and passes the appropriate statistical tests, this is our  
23 preferred specification using forward selection. Details of the intermediate estimations  
24 associated with the forward selection process are in the online appendix (see tables A5 and  
25 A6 in appendix A4).  
26  
27  
28  
29  
30  
31  
32  
33  
34  
35

36 The estimation of a mortality equation that includes both public health and healthcare  
37 expenditure generates an outcome elasticity for public health expenditure of -0.081 using  
38 backward selection and an elasticity of -0.144 using forward selection. The mid-point of  
39 these two elasticities is almost identical to the elasticity estimated without the inclusion of  
40 health care expenditure (= -0.115). Although statistically significant, these elasticities appear  
41 relatively modest when compared with the elasticity associated with healthcare expenditure  
42 (which, in this paper, is several times larger than the public health elasticity). However, this  
43 comparison is misleading because it fails to allow for the relative size of the two budgets  
44 (£65bn for healthcare and £2.5bn for public health in 2013/14). The coefficient on public  
45 health expenditure from column 2 of table 2 implies that a 1% increase in such expenditure  
46 (=£25.107m) in 2013/14 is associated with a 0.115% decline in mortality. With 446,560  
47 deaths in England in 2013, the coefficient on public health expenditure implies that an  
48 additional £25.107m of expenditure would avert 514 deaths (=0.115% of 446,560) and that  
49 the cost per death averted would be £48,894. Similar calculations can be made for the other  
50 outcome elasticities reported in table 2 and summarised in columns 1 and 2 of table 3. The  
51  
52  
53  
54  
55  
56  
57  
58  
59  
60

1  
2  
3 resulting cost per death averted estimates are shown in columns 3 and 4 of table 3. The  
4 estimates reveal that the healthcare cost of a death averted is between three times (backward  
5 selection) and four times (forward selection) the size of the public health cost.  
6  
7  
8  
9

10 Although interesting, the cost per death averted estimates are of limited relevance because a  
11 large proportion of CCG expenditure is not directed towards saving life but to improving the  
12 quality of life. To capture the full health effects associated with a change in expenditure, we  
13 require a measure that incorporates both survival and quality of life effects, i.e., we require a  
14 measure of the number of quality-adjusted life-years (QALYs).  
15  
16  
17  
18  
19  
20  
21  
22  
23  
24  
25  
26  
27  
28  
29  
30  
31  
32  
33  
34  
35  
36  
37  
38  
39  
40  
41  
42  
43  
44  
45  
46  
47  
48  
49  
50  
51  
52  
53  
54  
55  
56  
57  
58  
59  
60

For peer review only

Table 2 Derivation of preferred specifications for public health expenditure, 2013/14

| VARIABLES                                                     | (1)                                                                                                                                                 | (2)                                                                                                                                                    | (3)                                                                                                                                                                                     | (4)                                                                                                                                                                                        | (5)                                                                                                                                                                                       | (6)                                                                                                                                                                                       |
|---------------------------------------------------------------|-----------------------------------------------------------------------------------------------------------------------------------------------------|--------------------------------------------------------------------------------------------------------------------------------------------------------|-----------------------------------------------------------------------------------------------------------------------------------------------------------------------------------------|--------------------------------------------------------------------------------------------------------------------------------------------------------------------------------------------|-------------------------------------------------------------------------------------------------------------------------------------------------------------------------------------------|-------------------------------------------------------------------------------------------------------------------------------------------------------------------------------------------|
|                                                               | All causes<br>2013/14 PH spend<br>SYLLR 2013/14/15<br>outcome model<br>instrument PH spend<br><br>weighted<br>IV second stage<br>full specification | All causes<br>2013/14 PH spend<br>SYLLR 2013/14/15<br>outcome model<br>instrument PH spend<br><br>weighted<br>IV second stage<br>derived specification | All causes<br>2013/14 PH & PB spend<br>SYLLR 2013/14/15<br>outcome model<br>instrument PH&PB<br>spend<br>weighted<br>IV second stage<br>full specification<br><b>backward selection</b> | All causes<br>2013/14 PH & PB spend<br>SYLLR 2013/14/15<br>outcome model<br>instrument PH&PB<br>spend<br>weighted<br>IV second stage<br>derived specification<br><b>backward selection</b> | All causes<br>2013/14 PH & PB spend<br>SYLLR 2013/14/15<br>outcome model<br>instrument PH&PB<br>spend<br>weighted<br>IV second stage<br>initial specification<br><b>forward selection</b> | All causes<br>2013/14 PH & PB spend<br>SYLLR 2013/14/15<br>outcome model<br>instrument PH&PB<br>spend<br>weighted<br>IV second stage<br>derived specification<br><b>forward selection</b> |
| Public health spend per person                                | -0.084**<br>[0.041]                                                                                                                                 | -0.115**<br>[0.048]                                                                                                                                    | -0.024<br>[0.037]                                                                                                                                                                       | -0.081**<br>[0.034]                                                                                                                                                                        | -0.006<br>[0.025]                                                                                                                                                                         | -0.144***<br>[0.040]                                                                                                                                                                      |
| Healthcare spend per person                                   |                                                                                                                                                     |                                                                                                                                                        | -0.551<br>[0.413]                                                                                                                                                                       | -0.672***<br>[0.233]                                                                                                                                                                       | -1.012***<br>[0.244]                                                                                                                                                                      | -0.837***<br>[0.269]                                                                                                                                                                      |
| IMD 2010                                                      | 0.203***<br>[0.075]                                                                                                                                 | -0.505***<br>[0.157]                                                                                                                                   | 0.253***<br>[0.062]                                                                                                                                                                     | 0.221***<br>[0.063]                                                                                                                                                                        |                                                                                                                                                                                           |                                                                                                                                                                                           |
| Proportion of all residents born outside the EU               | -0.016<br>[0.018]                                                                                                                                   |                                                                                                                                                        | -0.043*<br>[0.024]                                                                                                                                                                      | -0.084***<br>[0.019]                                                                                                                                                                       |                                                                                                                                                                                           | -0.070***<br>[0.019]                                                                                                                                                                      |
| Proportion of population in white ethnic group                | 0.246***<br>[0.060]                                                                                                                                 |                                                                                                                                                        | 0.226***<br>[0.051]                                                                                                                                                                     |                                                                                                                                                                                            |                                                                                                                                                                                           |                                                                                                                                                                                           |
| Proportion of population providing unpaid care                | -0.439***<br>[0.167]                                                                                                                                | -0.231**<br>[0.091]                                                                                                                                    | -0.399***<br>[0.144]                                                                                                                                                                    | -0.479***<br>[0.096]                                                                                                                                                                       |                                                                                                                                                                                           | -0.547***<br>[0.122]                                                                                                                                                                      |
| Proportion of population aged 16-74 with no qualifications    | -0.034<br>[0.112]                                                                                                                                   |                                                                                                                                                        | -0.111<br>[0.105]                                                                                                                                                                       |                                                                                                                                                                                            |                                                                                                                                                                                           |                                                                                                                                                                                           |
| Proportion of households without a car                        | -0.062<br>[0.072]                                                                                                                                   |                                                                                                                                                        | -0.033<br>[0.087]                                                                                                                                                                       |                                                                                                                                                                                            |                                                                                                                                                                                           |                                                                                                                                                                                           |
| Proportion of households that are owner occupied              | 0.129*<br>[0.071]                                                                                                                                   |                                                                                                                                                        | 0.090<br>[0.075]                                                                                                                                                                        |                                                                                                                                                                                            |                                                                                                                                                                                           |                                                                                                                                                                                           |
| Proportion of households that are one pensioner households    | -0.082<br>[0.084]                                                                                                                                   |                                                                                                                                                        | -0.023<br>[0.079]                                                                                                                                                                       |                                                                                                                                                                                            |                                                                                                                                                                                           |                                                                                                                                                                                           |
| Lone parent households with dependent children                | 0.056<br>[0.060]                                                                                                                                    |                                                                                                                                                        | -0.048<br>[0.082]                                                                                                                                                                       |                                                                                                                                                                                            |                                                                                                                                                                                           |                                                                                                                                                                                           |
| Proportion of population aged 16-74 that are permanently sick | 0.315***<br>[0.070]                                                                                                                                 | 0.475***<br>[0.068]                                                                                                                                    | 0.237***<br>[0.068]                                                                                                                                                                     | 1.187***<br>[0.331]                                                                                                                                                                        | 0.554***<br>[0.031]                                                                                                                                                                       | 0.601***<br>[0.051]                                                                                                                                                                       |

1  
2  
3  
4  
5  
6  
7  
8  
9  
10  
11  
12  
13  
14  
15  
16  
17  
18  
19  
20  
21  
22  
23  
24  
25  
26  
27  
28  
29  
30  
31  
32  
33  
34  
35  
36  
37  
38  
39  
40  
41  
42  
43  
44  
45  
46

|                                                               |                      |                      |                      |                      |                      |                      |
|---------------------------------------------------------------|----------------------|----------------------|----------------------|----------------------|----------------------|----------------------|
| Proportion of those aged 16-74 that are long-term unemployed  | 0.039<br>[0.057]     |                      | 0.085<br>[0.060]     |                      |                      | 0.156***<br>[0.040]  |
| Proportion of those aged 16-74 working agriculture            | -0.015<br>[0.010]    |                      | -0.007<br>[0.013]    |                      |                      |                      |
| Proportion of those aged 16-74 in professional occupations    | -0.201***<br>[0.077] | -0.205***<br>[0.049] | -0.259***<br>[0.072] | -0.194***<br>[0.045] |                      |                      |
| IMD 2010, squared                                             |                      | 0.092***<br>[0.028]  |                      |                      |                      |                      |
| Proportion of population aged 16-74 permanently sick, squared |                      |                      |                      | 0.138***<br>[0.052]  |                      |                      |
| Constant                                                      | 5.532***<br>[0.649]  | 7.936***<br>[0.402]  | 8.714***<br>[2.852]  | 11.286***<br>[1.409] | 15.008***<br>[1.756] | 13.666***<br>[1.762] |
| Observations                                                  | 151                  | 151                  | 150                  | 150                  | 150                  | 150                  |
| Endogeneity test statistic                                    | 11.369               | 10.579               | 5.928                | 17.683               | 6.137                | 22.853               |
| Endogeneity p-value                                           | 0.001                | 0.001                | 0.052                | 0.000                | 0.046                | 0.000                |
| Hansen-Sargan test statistic                                  | 14.750               |                      | 20.849               | 1.667                | 23.78                | 1.465                |
| Hansen-Sargan p-value                                         | 0.000                |                      | 0.000                | 0.197                | 0.000                | 0.226                |
| Kleibergen-Paap LM test statistic                             | 26.821               | 32.762               | 9.027                | 16.034               | 24.002               | 18.331               |
| Kleibergen-Paap p-value                                       | 0.000                | 0.000                | 0.060                | 0.000                | 0.000                | 0.000                |
| Kleibergen-Paap F statistic                                   | 69.320               | 120.521              | 2.323                | 8.979                | 7.220                | 11.627               |
| Pesaran-Taylor reset statistic                                | 10.116               | 2.456                | 1.405                | 0.175                | 0.073                | 0.466                |
| Pesaran-Taylor p-value                                        | 0.001                | 0.117                | 0.236                | 0.676                | 0.788                | 0.495                |
| SW_PH F-statistic                                             | n/a                  | n/a                  | 70.796               | 70.796               | 100.608              | 57.002               |
| SW_PH p-value                                                 | n/a                  | n/a                  | 0.000                | 0.000                | 0.000                | 0.000                |
| SW_PB F-statistic                                             | n/a                  | n/a                  | 13.469               | 13.469               | 9.052                | 17.375               |
| SW_PB p-value                                                 | n/a                  | n/a                  | 0.000                | 0.000                | 0.000                | 0.000                |

Robust standard errors in brackets

\*\*\* p<0.01, \*\* p<0.05, \* p<0.1

1  
2  
3 Unfortunately, direct estimates of the QALY effects of public health expenditure are not  
4 available. However, previous work has used the estimated mortality effects of changes in  
5 NHS healthcare expenditure to calculate the QALY effects<sup>12</sup>. We can apply the same  
6 approach to estimate the QALY effects of public health expenditure if we assume that the  
7 distribution of mortality benefits across disease areas for public health expenditure is similar  
8 to that for CCG expenditure.  
9  
10  
11  
12  
13  
14

15 Previous work estimated that, in 2012/13, a 1% change in total healthcare expenditure  
16 generates 65,773 QALYs across all disease areas and this result implies an all-cause mortality  
17 elasticity of -1.028. This suggests that a 1% reduction in all-cause mortality is associated  
18 with a gain of 63,981 QALYs (65,773/1.028).<sup>12</sup> Therefore, a 1% increase in public health  
19 expenditure (£25.107m), which reduces all-cause mortality by 0.115% is associated with a  
20 gain of 7,358 QALYs (0.115 x 63,981). This 7,358 QALY gain, together with the additional  
21 expenditure of £25.107m, implies a cost per QALY for local public health expenditure of  
22 £3,412 (column 5, table 3).  
23  
24  
25  
26  
27  
28  
29

30 Similar calculations can be made for the two other public health elasticities (-0.081 and  
31 -0.144) reported in table 2 and the implied cost per QALY estimates are £4,845 and £2,725  
32 respectively (see column 5 of table 3). Using the same method, we can also use convert the  
33 all-cause healthcare elasticities in column 2 of table 2 into cost per QALY estimates. The  
34 backward selection elasticity (= -0.672) implies a cost per QALY of £14,912, while the  
35 forward selection elasticity (= -0.837) implies a cost per QALY of £11,973 (see column 6 of  
36 table 3).  
37  
38  
39  
40  
41  
42  
43  
44

45 Another way to look at the impact of changes in expenditure is to calculate the total health  
46 gains/losses associated with any such change. For example, two leading health charities  
47 recently estimated that (local) public health funding would have to increase by £1bn in  
48 2020/21 for real expenditure per person to be restored to its 2015/16 level.<sup>21</sup> We can use our  
49 cost per QALY estimates to calculate the total health gains associated with such a budget  
50 boost. If the £1bn is allocated to public health then the total health gain will be 206,398  
51 QALYs (=£1bn/£4,845). This calculation uses the most conservative of the two elasticities  
52 for health outcomes (-0.081) associated with public health expenditure. Alternatively, if the  
53 additional £1bn is allocated to healthcare then the total health gain will be 67,060 QALYs  
54  
55  
56  
57  
58  
59  
60

1  
2  
3 (=£1bn/£14,912). This calculation uses the most conservative of the two elasticities for  
4 health outcomes (-0.672) associated with healthcare expenditure.  
5  
6  
7

8 Similar health gain calculations can be made using the (less conservative) elasticities obtained  
9 using the forward selection process. The health gain estimates for public health and NHS  
10 treatment expenditure, and for forward and backward selection, are shown in columns 7 and 8  
11 of table 3. These health gain estimates, together with 95% confidence intervals, are  
12 illustrated graphically in figure 2  
13  
14  
15  
16

17  
18  
19 Insert figure 2 near here.  
20  
21

22 Using the point and standard error estimates associated with the mortality elasticities in table  
23 3, we undertook a simulation study of the difference between the public health and CCG  
24 QALY gains associated with the budget boost described in columns 7 and 8 of table 3. We  
25 made one million pairs of draws from the two distributions. We found that the public health  
26 QALY gain was greater than the CCG QALY gain in just over 94% of the draws from the  
27 backward selection estimates, and that this proportion increased to over 99% when the  
28 forward selection estimates were used. We conclude that the marginal public health QALY  
29 effect is greater than the CCG healthcare effect.  
30  
31  
32  
33  
34  
35  
36  
37  
38  
39  
40  
41  
42  
43  
44  
45  
46  
47  
48  
49  
50  
51  
52  
53  
54  
55  
56  
57  
58  
59  
60

Table 3 Mortality elasticities and cost per quality adjusted life year estimates for public health and healthcare expenditure, 2013/14

| Outcome specification                           | Mortality elasticity associated with | Mortality elasticity associated with | Cost per death averted (£) |            | Cost per QALY (£) |            | Health (QALY) gains associated with £1bn budget boost |            |
|-------------------------------------------------|--------------------------------------|--------------------------------------|----------------------------|------------|-------------------|------------|-------------------------------------------------------|------------|
|                                                 | public health expenditure            | healthcare expenditure               | public health              | healthcare | public health     | healthcare | public health                                         | healthcare |
|                                                 | col 1                                | col 2                                | col 3                      | col 4      | col 5             | col 6      | col 7                                                 | col 8      |
| <b>With public health spend only:</b>           |                                      |                                      |                            |            |                   |            |                                                       |            |
| backward selection                              | -0.115<br>[0.048]                    | n/a<br>n/a                           | £48,894                    | n/a        | £3,412            | n/a        | 293,083                                               | n/a        |
| <b>With public health and healthcare spend:</b> |                                      |                                      |                            |            |                   |            |                                                       |            |
| (a) backward selection                          | -0.081<br>[0.034]                    | -0.672<br>[0.233]                    | £69,414                    | £213,780   | £4,845            | £14,912    | 206,398                                               | 67,060     |
| (b) forward selection                           | -0.144<br>[0.040]                    | -0.837<br>[0.269]                    | £39,047                    | £171,631   | £2,725            | £11,973    | 366,973                                               | 83,512     |



#### 4. Discussion

If we compare the average of the backward and forward selection estimates, then public health expenditure appears to be about three to four times more productive than healthcare expenditure; that is, the prevention cost per QALY is about £3,800 whereas the treatment cost is £13,500. Similarly, the total health gains associated with a spending boost in public health are about three and a half times as great as those associated with the same boost in healthcare expenditure. This finding – that public health offers a much better return than healthcare at the margin – is also reported by other (American) studies.<sup>10 22</sup> Our (marginal) cost per QALY estimate for the public health grant (£3,800) is about halfway between the median cost per QALY associated with public health interventions assessed by NICE between 2005 and 2010 (£1,053), and between 2011 and 2016 (£7,843).<sup>8</sup>

Our cost per QALY estimates for the public health grant can also be compared with the return on investment associated with the public health interventions revealed by a systematic search of the literature.<sup>23</sup> This reported that, across both local and national interventions, a median return on investment (ROI) of 14.3 to 1. Putting aside average versus marginal differences, we can convert the cost per QALY associated with the public health grant (of about £3,800) into a societal ROI of about 15 to 1 if we assume that the value of a QALY is about £60,000 (this is the figure used by HM Treasury to evaluate public sector programmes).<sup>24</sup> Thus our cost per QALY estimates are very much in line with the findings from other studies that have used very different data sets and very different approaches to estimation.

Our findings suggest that at the margin public health expenditure is very productive of health and more productive than NHS expenditure. This suggests that the reallocation of resources from NHS healthcare to public health is likely to improve health outcomes overall and that the squeeze on the public health grant while protecting NHS expenditure over recent years is likely to have reduced health outcomes. It also means that new investments in public health interventions need to cost less than £3,800 per QALY to be accommodated within current levels of funding.

Our results also suggest that NHS expenditure is very productive of health (about £13,500 per QALY) and that it is considerably more productive than: (a) the norm (£30,000 per QALY) used by NICE to judge whether new technologies are cost-effective; and (b) HM Treasury's

1  
2  
3 value of a QALY (£60,000) when assessing public sector projects.<sup>24</sup> Our results also suggest  
4 that the inclusion of prevention expenditure in the health outcome equation does not  
5 materially affect the estimated cost per QALY associated with treatment expenditure. The  
6 cost per QALY for NHS expenditure reported here is similar to previous estimates where  
7 public health expenditure was excluded.<sup>11 12 17</sup>  
8  
9  
10  
11  
12

13 Different levels of expenditure on local public health services may affect mortality both  
14 directly and indirectly. For example, a recent review estimated that approximately one in five  
15 hospital in-patients in the UK are using alcohol harmfully, and one in ten is alcohol-  
16 dependent.<sup>25</sup> These figures are ten and eight times higher respectively than the general  
17 population.<sup>25</sup> Reductions in local community-based alcohol misuse services might increase  
18 alcohol-related mortality rates. They might also increase non-alcohol related mortality as  
19 addicts, who would have been treated in the community, now require hospitalisation and, by  
20 occupying a bed, delay other patients' access to hospital services.  
21  
22  
23  
24  
25  
26  
27  
28

29 Although our results are plausible, this study is not without its limitations. First, our focus is  
30 on the impact of the public health grant (£2.5bn in 2013/14) and we ignore the impact of  
31 other health-related expenditure (eg such as social care). Second, we ignore the impact of  
32 national public health programmes (eg for national immunisation and national screening  
33 programmes). These are the responsibility of the NHS Commissioning Board and are  
34 omitted because we do not have data for expenditure on national programmes by local area.  
35 Also, there will be some treatment expenditure within the public health grant, and there will  
36 be some prevention spend within the measure of CCG healthcare expenditure.  
37  
38  
39  
40  
41  
42  
43  
44

45 Moreover, equation (1) is static in the sense that it assumes that all health benefits occur  
46 contemporaneously with expenditure. However, our empirical implementation of (1) does  
47 slightly better than this because our outcome measure reflects not only mortality in the same  
48 year as expenditure but also in the two subsequent years. In a recent Californian study just  
49 over half of the cumulative lives saved as a result of a single year of public health spending  
50 occurred in the two years immediately following that expenditure.<sup>26</sup> Nevertheless we readily  
51 acknowledge that, for some public health expenditure, the health benefits might arise many  
52 years after the expenditure has occurred. This is particularly likely to be the case where  
53 expenditure is directed at encouraging healthy lifestyles, where some benefits may occur two  
54 or three decades after the actual expenditure.  
55  
56  
57  
58  
59  
60

1  
2  
3 However, this study is constrained by the available public health expenditure data which are  
4 almost exclusively cross-sectional (a funding formula for public health was first introduced in  
5 2013/14). Implicitly we are assuming that the data represent a quasi long-run equilibrium  
6 situation, that relative expenditure levels and health outcomes within each local authority  
7 have been reasonably stable over a period of time, and that any lagged effect of current  
8 expenditure on future mortality is offset by the impact of previous expenditure on current  
9 mortality. These are not unreasonable assumptions in the English context but they are just  
10 assumptions, and they might be less appropriate for other geographies where, for example,  
11 relative outcomes have changed through time.  
12  
13  
14  
15  
16  
17  
18  
19

20 The final limitation that must be mentioned is that there is always the possibility that we have  
21 omitted a relevant variable (eg one that affects both mortality and expenditure) from our  
22 regression specifications and such an omission might affect our results.  
23  
24  
25  
26  
27  
28

## 29 **5. Conclusions**

30  
31 An increase in public health expenditure is more productive of health than a change in NHS  
32 healthcare expenditure, and hence the recent proposal to shift resources away from the latter  
33 and towards the former is an evidence-based one. However, NHS healthcare expenditure is  
34 also productive of health and the cost per QALY (£13,500) is less than one-quarter of the  
35 value of a QALY (£60,000) used by HM Treasury when evaluating public sector projects.  
36 These comparisons suggest that additional prevention and healthcare expenditure, whether  
37 funded through additional taxation, borrowing or reallocation from other spending  
38 departments, appear good value when compared with the Treasury's estimates of the  
39 consumption value of health. Our cost per QALY calculations reveal that public health  
40 expenditure appears to be about three to four times more productive at the margin than  
41 healthcare expenditure. Thus Benjamin Franklin's axiom – that 'an ounce of prevention is  
42 worth a pound of cure' – is correct in this context in the sense that prevention is more  
43 productive than cure but, with 16 ounces to the pound, the adage rather exaggerates the size  
44 of this advantage.  
45  
46  
47  
48  
49  
50  
51  
52  
53  
54  
55  
56  
57  
58  
59  
60

## References

1. Office for National Statistics. Healthcare expenditure, UK Health Accounts: 2017. See <https://www.ons.gov.uk/peoplepopulationandcommunity/healthandsocialcare/healthcaresystem/bulletins/ukhealthaccounts/2017>.
2. DHSC, 2018. Prevention is better than cure: Our vision to help you live well for longer. See: <https://www.gov.uk/government/publications/prevention-is-better-than-cure-our-vision-to-help-you-live-well-for-longer>.
3. Command Paper 110, 2019. Advancing our health: Prevention in the 2020s. See: <https://www.gov.uk/government/consultations/advancing-our-health-prevention-in-the-2020s>.
4. Department for Business, Energy and Industrial Strategy, 2019. The Grand Challenges. Available at: <https://www.gov.uk/government/publications/industrial-strategy-the-grand-challenges/industrial-strategy-the-grand-challenges>.
5. HM Treasury, September 2019. Spending Round 2019. CP170. Available at: [https://assets.publishing.service.gov.uk/government/uploads/system/uploads/attachment\\_data/file/829177/Spending\\_Round\\_2019\\_web.pdf](https://assets.publishing.service.gov.uk/government/uploads/system/uploads/attachment_data/file/829177/Spending_Round_2019_web.pdf).
6. Anandaciva, S. (2019). Five numbers to sum up the Spending round for health and social care. The King's Fund. See: <https://www.kingsfund.org.uk/publications/spending-round-health-social-care>.
7. Bunn, J (2019). New burdens could wipe out public health grant uplift. HSJ, 30 September. See: <https://www.hsj.co.uk/public-health/new-burdens-could-wipe-out-public-health-grant-uplift/7026030.article>.
8. Owen, L., Pennington, B., Fischer, A. and Jeong, K. (2018). The cost-effectiveness of public health interventions examined by NICE from 2011 to 2016. *Journal of Public Health*, Volume 40, Issue 3, 1 September 2018, Pages 557–566. Available at: <https://doi.org/10.1093/pubmed/fox119> [accessed 08 March 2019].
9. Dillon, A. 2015. Carrying NICE over the threshold. See: <https://www.nice.org.uk/news/blog/carrying-nice-over-the-threshold>.
10. Brown T. T. (2014). How effective are public health departments at preventing mortality? *Econ Hum Biol.*,13:34–45. See: <https://www.sciencedirect.com/science/article/pii/S1570677X13000920?via%3Dihub>.
11. Claxton, K., Martin, S., Soares M, Rice N, Spackman E, Hinde S, Devlin N, Smith PC and Sculpher M, 2015. Methods for the estimation of the National Institute for Health and Care Excellence cost-effectiveness threshold. *Health technology assessment*, 2015 Feb, 19(14), pp.1-503, v-vi. Available at: <https://www.ncbi.nlm.nih.gov/pubmed/25692211>.
12. Lomas, J., Claxton, K., and Martin, S. (2019). Estimating the marginal productivity of the English National Health Service from 2003/04 to 2012/13. *Value in Health*, forthcoming. DOI: <https://doi.org/10.1016/j.jval.2019.04.1926>.
13. NHS England (2015). 2013-14 CCG Programme Budgeting Benchmarking Tool. Available from <https://www.england.nhs.uk/prog-budgeting/> [accessed 08 January, 2019].
14. DH (2012a). Public health functions to be exercised by the NHS Commissioning Board. Available from:

- 1  
2  
3  
4  
5  
6  
7  
8  
9  
10  
11  
12  
13  
14  
15  
16  
17  
18  
19  
20  
21  
22  
23  
24  
25  
26  
27  
28  
29  
30  
31  
32  
33  
34  
35  
36  
37  
38  
39  
40  
41  
42  
43  
44  
45  
46  
47  
48  
49  
50  
51  
52  
53  
54  
55  
56  
57  
58  
59  
60
- [https://assets.publishing.service.gov.uk/government/uploads/system/uploads/attachment\\_data/file/213153/s7A-master-131114-final.pdf](https://assets.publishing.service.gov.uk/government/uploads/system/uploads/attachment_data/file/213153/s7A-master-131114-final.pdf) [accessed 08 March 2019].
15. MCHLG (2015). Local authority revenue expenditure and financing England: 2013 to 2014 individual local authority data – outturn. See <https://www.gov.uk/government/statistics/local-authority-revenue-expenditure-and-financing-england-2013-to-2014-individual-local-authority-data-outturn>.
16. Andrews, M. et al., 2017. Inference in the presence of redundant moment conditions and the impact of government health expenditure on health outcomes in England. *Econometric Reviews*, 36(1–3), pp.23–41. Available at: <https://www.tandfonline.com/doi/full/10.1080/07474938.2016.1114205> [Accessed July 24, 2017].
17. Claxton, K., Lomas, J. & Martin, S., 2018. The impact of NHS expenditure on health outcomes in England: Alternative approaches to identification in all-cause and disease specific models of mortality. *Health Economics*, 27(6), pp.1017-1023. Available at: <https://onlinelibrary.wiley.com/doi/abs/10.1002/hec.3650> [Accessed July 17, 2018].
18. DH (2012b). Exposition Book Public Health Allocations 2013-14 and 2014-15: Technical Guide. This is available at: [https://assets.publishing.service.gov.uk/government/uploads/system/uploads/attachment\\_data/file/213324/Public-Health-Weighted-Capitation-FormulaTechnical-Guide-v0.13.pdf](https://assets.publishing.service.gov.uk/government/uploads/system/uploads/attachment_data/file/213324/Public-Health-Weighted-Capitation-FormulaTechnical-Guide-v0.13.pdf).
19. Martin, S, Lomas, J, and Claxton, K. (2019). Is an Ounce of Prevention Worth a Pound of Cure? Estimates of the Impact of English Public Health Grant on Mortality and Morbidity. Centre for Health Economics Research Paper 166. Available at: [https://www.york.ac.uk/media/che/documents/papers/researchpapers/CHERP166\\_Impact\\_Public\\_Health\\_Mortality\\_Morbidity.pdf](https://www.york.ac.uk/media/che/documents/papers/researchpapers/CHERP166_Impact_Public_Health_Mortality_Morbidity.pdf) [Accessed July 17, 2020].
20. Baum, C.F., Schaffer, M.E., Stillman, S. (2010). ivreg2: Stata module for extended instrumental variables/2SLS, GMM and AC/HAC, LIML and k-class regression. Available from: <http://ideas.repec.org/c/boc/bocode/s425401.html>
21. The King’s Fund, 2019. Health charities make urgent call for £1 billion a year to reverse cuts to public health funding. 12 June. See <https://www.kingsfund.org.uk/press/press-releases/reverse-cuts-public-health-funding> [accessed 13 November 2019].
22. Leider J P, Natalia Alfonso, Beth Resnick, Eoghan Brady, J. McCullough, and David Bishai (2018). Assessing The Value Of 40 Years Of Local Public Expenditures On Health. *Health Affairs* 37, 4: 560–569. DOI: 10.1377/hlthaff.2017.1171.
23. Masters R, Anwar E, Collins B, Cookson, R, Capewel S. (2017). Return on investment of public health interventions: a systematic review. *J Epidemiol Community Health*;71:827834. Available from: <https://jech.bmj.com/content/jech/71/8/827.full.pdf>.
24. HM Treasury, 2018. The Green Book: Central government guidance on appraisal and evaluation.
25. Roberts, E., Morse, R., Epstein, S., Hotopf, M., Leon, D. and Drummond C. (2019). The prevalence of wholly attributable alcohol conditions in the United Kingdom

- 1  
2  
3 hospital system: a systematic review, meta-analysis and meta-regression. *Addiction*,  
4 July, <https://doi.org/10.1111/add.14642> [accessed 22 August 2019].  
5  
6 26. Brown T. T. (2016). Returns on Investment in California County Departments of  
7 Public Health. *Am J Public Health*. 2016 Aug;106(8):1477-82. doi:  
8 10.2105/AJPH.2016.30323  
9  
10  
11  
12  
13  
14  
15  
16  
17  
18  
19  
20  
21  
22  
23  
24  
25  
26  
27  
28  
29  
30  
31  
32  
33  
34  
35  
36  
37  
38  
39  
40  
41  
42  
43  
44  
45  
46  
47  
48  
49  
50  
51  
52  
53  
54  
55  
56  
57  
58  
59  
60

For peer review only

1  
2  
3  
4  
5  
6  
7  
8  
9  
10  
11  
12  
13  
14  
15  
16  
17  
18  
19  
20  
21  
22  
23  
24  
25  
26  
27  
28  
29  
30  
31  
32  
33  
34  
35  
36  
37  
38  
39  
40  
41  
42  
43  
44  
45  
46  
47  
48  
49  
50  
51  
52  
53  
54  
55  
56  
57  
58  
59  
60

Figure 1 Causal paths diagram

For peer review only

1  
2  
3 Figure 2 Total health gains associated with a £1bn budget boost for public health and  
4 NHS treatment expenditure, by method of selection of covariates  
5  
6  
7  
8  
9  
10  
11  
12  
13  
14  
15  
16  
17  
18  
19  
20  
21  
22  
23  
24  
25  
26  
27  
28  
29  
30  
31  
32  
33  
34  
35  
36  
37  
38  
39  
40  
41  
42  
43  
44  
45  
46  
47  
48  
49  
50  
51  
52  
53  
54  
55  
56  
57  
58  
59  
60

For peer review only



Figure 1 Causal paths diagram

Key

- actual direction of influence
- ✓ - - - desired direction of influence
- ✗ - - - unwanted direction of influence
- ↘ broken direction of influence

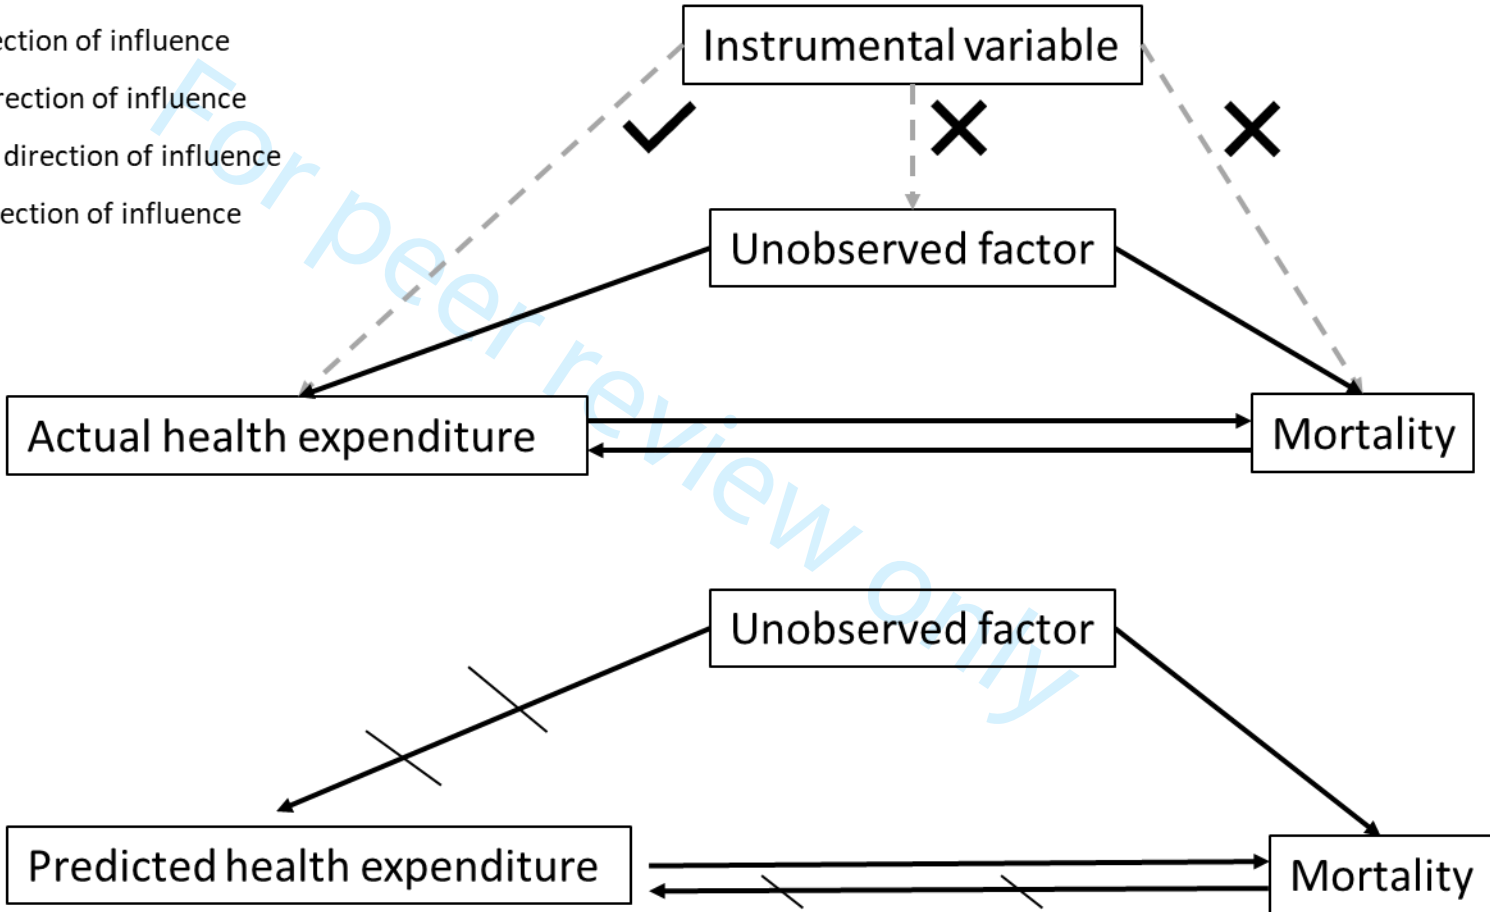

Figure 2 Total health gains associated with a £1bn budget boost for public health and NHS treatment expenditure, by method of selection of covariates

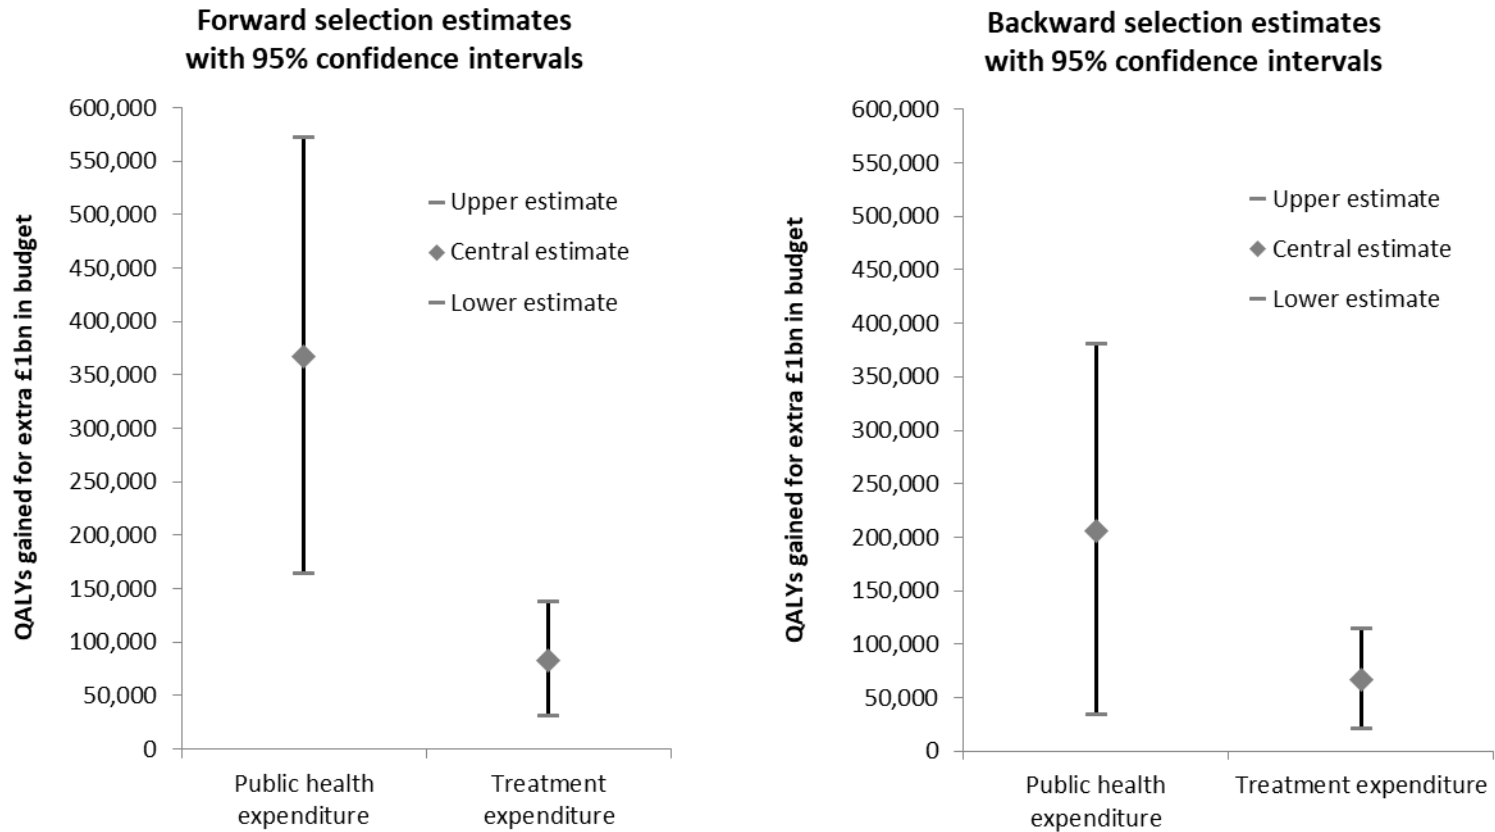

1  
2  
3  
4  
5  
6  
7  
8  
9  
10  
11  
12  
13

**Is an ounce of prevention worth a pound of cure?**  
**A cross-sectional study of the impact of the**  
**English public health grant on mortality and morbidity**

14  
15  
16  
17  
18  
19  
20  
21  
22  
23  
24  
25  
26  
27  
28  
29  
30  
31  
32  
33  
34  
35  
36  
37  
38  
39  
40  
41  
42  
43  
44  
45  
46  
47  
48  
49  
50  
51  
52  
53  
54  
55  
56  
57  
58  
59  
60

**Appendices**

**Appendix A1**

**Is public health expenditure solely preventative?**

One rudimentary guide to the volume of preventative expenditure by CCGs is provided by the programme budgeting data set for 2013/14. This reports a total spend of £411m in the 'Healthy Individuals' programme of which £151m is for 'prescribing in primary care' and £190m is for 'community and integrated care'.<sup>1</sup> In principle we could add this expenditure (£411m) to that from the public health grant (£2,500m) to obtain an overall measure of public health spend. However, as the precise set of activities covered by this CCG 'Healthy Individuals' expenditure is unclear and there are always issues about how consistently different CCGs allocate activity to different programme budget categories, we prefer to focus on the public health grant as our measure of public health expenditure. We include the 'Healthy Individuals' spend as part of the total measure of healthcare (treatment) expenditure. Our estimates of the impact of the public health grant and CCG expenditure will largely reflect 'prevention' and 'treatment' effects respectively, but we acknowledge that there will be relatively small elements of treatment expenditure in the prevention measure, and relatively small elements of prevention expenditure in the treatment measure.

## Appendix A2

### On the use of the market forces factor (MFF) as an instrument for public health expenditure

The local input price index (MFF), which will reflect characteristics of the local (health) economy, may be correlated with unmeasured determinants of mortality. However, we have over a dozen potential socio-economic covariates (including the Index of Multiple Deprivation) in the baseline mortality equation and hence it is difficult to imagine what effect the input price index would detect that our covariates do not. Of course, if a locality gets a larger budget to compensate for the higher cost of supplying healthcare, as happens with the local price index, and this adjustment exactly compensates for additional costs, then there is no reason why this additional spending should improve health because it does not correspond to an increase in real spending. In reality, of course, the cost adjustment will not be perfect. Some local authorities will be over compensated and hence receive 'too much' funding; others will be under compensated and receive 'too small' a budget. This imperfect adjustment for local conditions provides the link between this instrument, expenditure and mortality. The same argument applies to the use of the age index as an instrument for healthcare expenditure discussed later.

## Appendix A3

### Estimation strategy with the inclusion of healthcare expenditure

Initially the health outcome equation (equation 1) is estimated using the strategy described in section 2.2 with public health as the sole health expenditure variable. We then re-estimate equation 1 – using the same strategy – but this time including healthcare expenditure as an additional endogenous regressor. This variable is instrumented in a similar way to public health. However, the identification of the relevant funding rule variables is slightly complicated because of the changes imposed by the Health and Social Care Act 2012. Usually funding formulae are updated every year but the impending abolition of PCTs meant that the weighted capitation formula was frozen for 2012-13, with all PCTs receiving the same (3%) growth rate over their 2011/12 allocations. As CCG responsibilities in 2013/14 differed from those for PCTs (eg they lost responsibility for public health, specialised services, and primary care), there was a baseline exercise in 2012 that stripped out actual expenditure on these components and, for 2013-14, each CCG was given an uplift of 2.3% on these 2012 baselines.<sup>2</sup>

The implication of these developments for this study is that the best funding rule variables we can identify for CCG healthcare expenditure in 2013/14 are drawn from the 2011/12 allocations for PCTs, appropriately mapped to the new (CCG) geography. These allocations reflect three separate funding formulae (one for Hospital and Community Services (HCHS), one for prescribing, and one for primary care), and we select three funding rule variables employed in these formulae which we believe are uncorrelated with mortality. In particular, our funding rule variables for healthcare expenditure are: (i) the DFT for the total allocation to PCTs for 2011/12; (ii) the MFF for the HCHS component of the total allocation; and (iii) the age index from the prescribing cost component of the total allocation. The DFT variable is available from the Department of Health's website at <https://www.networks.nhs.uk/nhsnetworks/health-investment-network/news/2012-13-programme-budgeting-data-is-nowavailable> (accessed 22 July 2020), and the MFF and prescribing cost age indices are available from the exposition books for the 2011/12 allocations at <https://www.gov.uk/government/publications/exposition-book-2011-2012> (accessed 22 July 2020).

A recent study provided no explicit arguments in support of these instruments for healthcare expenditure but this omission is easily remedied.<sup>3</sup> First, our measure of mortality and the prescribing cost age index instrument are both standardised for age, and so the age index is unlikely to be correlated with the error from equation (1). Second, and as already noted when discussing the instruments for public health expenditure, the local input price index will reflect characteristics of

1  
2 the local (health) economy and these might be correlated with unmeasured determinants of  
3 mortality. However, we have over a dozen potential socio-economic covariates in the baseline  
4 mortality equation and hence it is difficult to imagine what effect the MFF would detect that our  
5 covariates do not. Third, the DFT variable for healthcare allocations will reflect the various funding  
6 formulae and 'pace of change' policies implemented under several governments of various political  
7 persuasions over the past thirty years. The 'pace of change' and the consequent DFT are policy  
8 choices but it is not obvious that the latter will be endogenous with respect to mortality; and, as  
9 noted for the instruments for public health expenditure, any correlation between our instruments and  
10 the error term in equation (1) is likely to be detected by the Hansen-Sargan test.  
11  
12  
13  
14  
15  
16  
17  
18  
19  
20  
21  
22  
23  
24  
25  
26  
27  
28  
29  
30  
31  
32  
33  
34  
35  
36  
37  
38  
39  
40  
41  
42  
43  
44  
45  
46  
47  
48  
49  
50  
51  
52  
53  
54  
55  
56  
57  
58  
59  
60

For peer review only

## Appendix A4

### Extended presentation of results

#### *With the public health grant as the only expenditure variable*

Estimation of the health outcome equation (equation 1) with public health as the sole expenditure variable generates the result shown in column 1 of table A1. The corresponding first-stage result is in column 1 of table A2. Application of the backward selection process generates the more parsimonious specification shown in column 2 of table A1. Public health expenditure has the anticipated negative association with mortality but this specification fails the reset test and the instrument set is invalid (the Hansen-Sargan test statistic  $p$ value $<0.100$ ). The addition of IMD 2010 squared to the specification resolves the reset test but not the instrument validity issue (column 3). The result in column 4 omits that instrument (the MFF index) which is the most significant when added as a control to the second-stage equation. The significant positive coefficient (0.252) on the 'white ethnicity' variable might reflect a lifestyle effect but, in the interests of clarity, we re-estimate without this variable and obtain the result shown in column 5. The coefficient on the 'permanently sick' variable increases considerably (from 0.265 to 0.475) and the coefficient on the 'working in agriculture' variable is no longer significant. Re-estimation without the latter variable generates our preferred specification shown in column 6. In this, public health expenditure has a modest but statistically significant negative association with mortality, expenditure is endogenous, there is no evidence of weak instruments (the Kleibergen-Paap F statistic exceeds the rule-of-thumb threshold value (=10)), and the specification passes the reset test.

Table A1 Derivation of preferred specification for public health expenditure, second-stage results, 2013/14

|                                                               | (1)                 | (2)                 | (3)                 | (4)                 | (5)                 | (6)                 |
|---------------------------------------------------------------|---------------------|---------------------|---------------------|---------------------|---------------------|---------------------|
|                                                               | All causes          |
|                                                               | 2013/14 PH spend    |
|                                                               | SYLLR 2013/14/15    |
|                                                               | outcome model       |
|                                                               | instrument PH spend |
|                                                               | weighted            | weighted            | weighted            | weighted            | weighted            | weighted            |
|                                                               | IV second stage     |
|                                                               | full specification  | new derivation      |
|                                                               |                     |                     | revised1            | revised2            | revised2            | revised2            |
| VARIABLES                                                     |                     |                     |                     |                     | SA_1                | SA_2                |
| Public health spend per person                                | -0.084**            | -0.122***           | -0.108**            | -0.119***           | -0.116**            | -0.115**            |
|                                                               | [0.041]             | [0.046]             | [0.043]             | [0.043]             | [0.047]             | [0.048]             |
| IMD 2010                                                      | 0.203***            | 0.152**             | -0.271*             | -0.374**            | -0.509***           | -0.505***           |
|                                                               | [0.075]             | [0.063]             | [0.141]             | [0.146]             | [0.163]             | [0.157]             |
| Proportion of all residents born outside the EU               | -0.016              |                     |                     |                     |                     |                     |
|                                                               | [0.018]             |                     |                     |                     |                     |                     |
| Proportion of population in white ethnic group                | 0.246***            | 0.261***            | 0.249***            | 0.252***            |                     |                     |
|                                                               | [0.060]             | [0.039]             | [0.038]             | [0.038]             |                     |                     |
| Proportion of population providing unpaid care                | -0.439***           | -0.346***           | -0.271***           | -0.235***           | -0.235***           | -0.231**            |
|                                                               | [0.167]             | [0.088]             | [0.083]             | [0.084]             | [0.090]             | [0.091]             |
| Proportion of population aged 16-74 with no qualifications    | -0.034              |                     |                     |                     |                     |                     |
|                                                               | [0.112]             |                     |                     |                     |                     |                     |
| Proportion of households without a car                        | -0.062              |                     |                     |                     |                     |                     |
|                                                               | [0.072]             |                     |                     |                     |                     |                     |
| Proportion of households that are owner occupied              | 0.129*              |                     |                     |                     |                     |                     |
|                                                               | [0.071]             |                     |                     |                     |                     |                     |
| Proportion of households that are one pensioner households    | -0.082              |                     |                     |                     |                     |                     |
|                                                               | [0.084]             |                     |                     |                     |                     |                     |
| Lone parent households with dependent children                | 0.056               |                     |                     |                     |                     |                     |
|                                                               | [0.060]             |                     |                     |                     |                     |                     |
| Proportion of population aged 16-74 that are permanently sick | 0.315***            | 0.319***            | 0.284***            | 0.265***            | 0.475***            | 0.475***            |
|                                                               | [0.070]             | [0.077]             | [0.071]             | [0.072]             | [0.067]             | [0.068]             |
| Proportion of those aged 16-74 that are long-term unemployed  | 0.039               |                     |                     |                     |                     |                     |
|                                                               | [0.057]             |                     |                     |                     |                     |                     |
| Proportion of those aged 16-74 working agriculture            | -0.015              | -0.025***           | -0.020***           | -0.016**            | 0.001               |                     |
|                                                               | [0.010]             | [0.007]             | [0.007]             | [0.007]             | [0.007]             |                     |
| Proportion of those aged 16-74 in professional occupations    | -0.201***           | -0.268***           | -0.243***           | -0.230***           | -0.204***           | -0.205***           |
|                                                               | [0.077]             | [0.044]             | [0.046]             | [0.047]             | [0.050]             | [0.049]             |



1  
2  
3  
4  
5  
6  
7  
8  
9  
10  
11  
12  
13  
14  
15  
16  
17  
18  
19  
20  
21  
22  
23  
24  
25  
26  
27  
28  
29  
30  
31  
32  
33  
34  
35  
36  
37  
38  
39  
40  
41  
42  
43  
44  
45  
46

|                                   |          |          |          |          |          |          |
|-----------------------------------|----------|----------|----------|----------|----------|----------|
| IMD 2010 Squared                  |          |          | 0.078*** | 0.100*** | 0.093*** | 0.092*** |
|                                   |          |          | [0.026]  | [0.027]  | [0.029]  | [0.028]  |
| Constant                          | 5.532*** | 5.895*** | 6.514*** | 6.710*** | 7.941*** | 7.936*** |
|                                   | [0.649]  | [0.349]  | [0.393]  | [0.402]  | [0.397]  | [0.402]  |
| Observations                      | 151      | 151      | 151      | 151      | 151      | 151      |
| Endogeneity test statistic        | 11.369   | 10.449   | 8.572    | 15.109   | 13.881   | 10.579   |
| Endogeneity p-value               | 0.001    | 0.001    | 0.003    | 0.000    | 0.000    | 0.001    |
| Hansen-Sargan test statistic      | 14.750   | 10.957   | 14.408   |          |          |          |
| Hansen-Sargan p-value             | 0.000    | 0.001    | 0.000    |          |          |          |
| Kleibergen-Paap LM test statistic | 26.821   | 34.909   | 35.502   | 34.884   | 34.868   | 32.762   |
| Kleibergen-Paap p-value           | 0.000    | 0.000    | 0.000    | 0.000    | 0.000    | 0.000    |
| Kleibergen-Paap F statistic       | 69.320   | 88.578   | 99.555   | 192.280  | 185.421  | 120.521  |
| Pesaran-Taylor reset statistic    | 10.116   | 6.248    | 0.599    | 0.469    | 2.422    | 2.456    |
| Pesaran-Taylor p-value            | 0.001    | 0.012    | 0.439    | 0.493    | 0.120    | 0.117    |

Robust standard errors in brackets  
\*\*\* p<0.01, \*\* p<0.05, \* p<0.1

For peer review only

Table A2 First-stage regression results for derivation of preferred specification for public health expenditure, 2013/14

|                                                               | (1)                | (2)              | (3)              | (4)              | (5)              | (6)              |
|---------------------------------------------------------------|--------------------|------------------|------------------|------------------|------------------|------------------|
|                                                               | All causes         | All causes       | All causes       | All causes       | All causes       | All causes       |
|                                                               | 2013/14 PH spend   | 2013/14 PH spend | 2013/14 PH spend | 2013/14 PH spend | 2013/14 PH spend | 2013/14 PH spend |
|                                                               | SYLLR 2013/14/15   | SYLLR 2013/14/15 | SYLLR 2013/14/15 | SYLLR 2013/14/15 | SYLLR 2013/14/15 | SYLLR 2013/14/15 |
|                                                               | outcome model      | outcome model    | outcome model    | outcome model    | outcome model    | outcome model    |
|                                                               | first-stage        | first-stage      | first-stage      | first-stage      | first-stage      | first-stage      |
|                                                               | weighted           | weighted         | weighted         | weighted         | weighted         | weighted         |
|                                                               | OLS                | OLS              | OLS              | OLS              | OLS              | OLS              |
|                                                               | full specification | new derivation   |
| VARIABLES                                                     |                    |                  | revised1         | revised2         | revised2         | revised2         |
|                                                               |                    |                  |                  |                  | SA_1             | SA_2             |
| DFT index_Public health_1314                                  | 0.729***           | 0.747***         | 0.762***         | 0.759***         | 0.759***         | 0.739***         |
|                                                               | [0.062]            | [0.056]          | [0.054]          | [0.055]          | [0.056]          | [0.067]          |
| MFF Index_Public health_1314                                  | -0.655*            | -0.559           | -0.565           |                  |                  |                  |
|                                                               | [0.350]            | [0.348]          | [0.352]          |                  |                  |                  |
| IMD 2010                                                      | 0.122              | 0.139            | -0.590           | -0.548           | -0.599*          | -0.931**         |
|                                                               | [0.137]            | [0.113]          | [0.388]          | [0.357]          | [0.357]          | [0.388]          |
| Proportion of all residents born outside the EU               | 0.031              |                  |                  |                  |                  |                  |
|                                                               | [0.050]            |                  |                  |                  |                  |                  |
| Proportion of population in white ethnic group                | 0.309*             | 0.020            | 0.028            | 0.095            |                  |                  |
|                                                               | [0.178]            | [0.083]          | [0.080]          | [0.071]          |                  |                  |
| Proportion of population providing unpaid care                | -0.113             | -1.099***        | -1.008***        | -0.903***        | -0.904***        | -1.150***        |
|                                                               | [0.393]            | [0.161]          | [0.167]          | [0.151]          | [0.155]          | [0.180]          |
| Proportion of population aged 16-74 with no qualifications    | -0.277             |                  |                  |                  |                  |                  |
|                                                               | [0.185]            |                  |                  |                  |                  |                  |
| Proportion of households without a car                        | 0.141              |                  |                  |                  |                  |                  |
|                                                               | [0.136]            |                  |                  |                  |                  |                  |
| Proportion of households that are owner occupied              | -0.179             |                  |                  |                  |                  |                  |
|                                                               | [0.157]            |                  |                  |                  |                  |                  |
| Proportion of households that are one pensioner households    | -0.439*            |                  |                  |                  |                  |                  |
|                                                               | [0.238]            |                  |                  |                  |                  |                  |
| Lone parent households with dependent children                | -0.001             |                  |                  |                  |                  |                  |
|                                                               | [0.112]            |                  |                  |                  |                  |                  |
| Proportion of population aged 16-74 that are permanently sick | 0.326**            | 0.532***         | 0.489***         | 0.471***         | 0.550***         | 0.573***         |
|                                                               | [0.133]            | [0.120]          | [0.124]          | [0.124]          | [0.103]          | [0.116]          |
| Proportion of those aged 16-74 that are long-term unemployed  | 0.046              |                  |                  |                  |                  |                  |
|                                                               | [0.099]            |                  |                  |                  |                  |                  |
| Proportion of those aged 16-74 working agriculture            | -0.070***          | -0.080***        | -0.074***        | -0.066***        | -0.060***        |                  |
|                                                               | [0.021]            | [0.013]          | [0.013]          | [0.012]          | [0.011]          |                  |

|   |                                                            |          |          |          |          |          |          |
|---|------------------------------------------------------------|----------|----------|----------|----------|----------|----------|
| 1 |                                                            |          |          |          |          |          |          |
| 2 | Proportion of those aged 16-74 in professional occupations | -0.339** | -0.100   | -0.052   | -0.115   | -0.105   | -0.008   |
| 3 |                                                            | [0.146]  | [0.095]  | [0.096]  | [0.098]  | [0.096]  | [0.100]  |
| 4 | IMD 2010 Squared                                           |          |          | 0.133**  | 0.132**  | 0.129**  | 0.204*** |
| 5 |                                                            |          |          | [0.064]  | [0.059]  | [0.060]  | [0.064]  |
| 6 | Constant                                                   | 2.542**  | 2.020*** | 3.146*** | 3.191*** | 3.658*** | 3.929*** |
| 7 |                                                            | [1.116]  | [0.578]  | [0.829]  | [0.804]  | [0.683]  | [0.753]  |
| 8 | Observations                                               | 151      | 151      | 151      | 151      | 151      | 151      |

9 Robust standard errors in brackets  
 10 \*\*\* p<0.01, \*\* p<0.05, \* p<0.1

For peer review only

11  
12  
13  
14  
15  
16  
17  
18  
19  
20  
21  
22  
23  
24  
25  
26  
27  
28  
29  
30  
31  
32  
33  
34  
35  
36  
37  
38  
39  
40  
41  
42  
43  
44  
45  
46

1  
2 *With both the public health grant and healthcare as the expenditure variables: backward selection*  
3  
4 Estimation of equation (1) with both public health and healthcare expenditure as endogenous  
5 regressors generates the result shown in column 1 of table A3. This specification includes five  
6 instruments (two for public health expenditure and three for healthcare expenditure). The  
7 corresponding first-stage results can be found in column 1 (for public health) and in column 2 (for  
8 healthcare) in table A4.  
9  
10  
11  
12  
13

14 Some authors have expressed concern about the inclusion of weak instruments,<sup>4</sup> and hence we re-  
15 estimate the 'full' specification without the two insignificant MFF instruments (see column 2 of  
16 table A3). Application of the backward selection process generates the more parsimonious result  
17 shown in column 3 but the instrument set is invalid at the 1% level. On checking to see if any of  
18 the deleted variables or their squared values is significant when added as a control to the second-  
19 stage, we found that the 'permanently sick' variable squared is both significant and resolves the  
20 weak instrument issue for healthcare expenditure. Again in the interests of clarity, we tried re-  
21 estimating the specification in column 4 without the 'white ethnicity' variable. This generates the  
22 plausible result shown in column 5 where both expenditure variables have the anticipated negative  
23 association with mortality, they are endogenous, the instrument set is valid, and the instrument sets  
24 for both endogenous variables are individually strong (the Sanderson-Windmeijer F-statistics are  
25 around ten or better).  
26  
27  
28  
29  
30  
31  
32  
33  
34  
35  
36  
37  
38  
39  
40  
41  
42  
43  
44  
45  
46  
47  
48  
49  
50  
51  
52  
53  
54  
55  
56  
57  
58  
59  
60

Table A3 Derivation of preferred specification for public health expenditure with healthcare expenditure, backward selection, 2013/14

|                                                               | (1)                    | (2)                    | (3)                    | (4)                    | (5)                    |
|---------------------------------------------------------------|------------------------|------------------------|------------------------|------------------------|------------------------|
|                                                               | All causes             |
|                                                               | 2013/14 PH & PB spend  |
|                                                               | SYLLR 2013/14/15       |
|                                                               | outcome model          |
|                                                               | instrument PH&PB spend |
|                                                               | weighted               | weighted               | weighted               | weighted               | weighted               |
|                                                               | IV second stage        |
|                                                               | backward selection     |
|                                                               | full specification     | full specification     | derived specification  | derived specification  | derived specification  |
| VARIABLES                                                     | five instruments       | three instruments      | three instruments      | revised                | revised                |
| Public health spend per person, 2013/14                       | -0.024<br>[0.037]      | -0.052<br>[0.038]      | 0.010<br>[0.033]       | -0.037<br>[0.034]      | -0.081**<br>[0.034]    |
| Healthcare spend per person, 2013/14                          | -0.551<br>[0.413]      | -0.076<br>[0.355]      | -0.869***<br>[0.233]   | -0.662***<br>[0.204]   | -0.672***<br>[0.233]   |
| IMD 2010                                                      | 0.253***<br>[0.062]    | 0.231***<br>[0.078]    | 0.271***<br>[0.067]    | 0.281***<br>[0.063]    | 0.221***<br>[0.063]    |
| Proportion of all residents born outside the EU               | -0.043*<br>[0.024]     | -0.023<br>[0.023]      | -0.054***<br>[0.020]   | -0.042**<br>[0.019]    | -0.084***<br>[0.019]   |
| Proportion of population in white ethnic group                | 0.226***<br>[0.051]    | 0.237***<br>[0.058]    | 0.192***<br>[0.034]    | 0.185***<br>[0.036]    |                        |
| Proportion of population providing unpaid care                | -0.399***<br>[0.144]   | -0.466***<br>[0.165]   | -0.376***<br>[0.099]   | -0.372***<br>[0.096]   | -0.479***<br>[0.096]   |
| Proportion of population aged 16-74 with no qualifications    | -0.111<br>[0.105]      | -0.089<br>[0.124]      |                        |                        |                        |
| Proportion of households without a car                        | -0.033<br>[0.087]      | -0.091<br>[0.083]      |                        |                        |                        |
| Proportion of households that are owner occupied              | 0.090<br>[0.075]       | 0.103<br>[0.074]       |                        |                        |                        |
| Proportion of households that are one pensioner households    | -0.023<br>[0.079]      | -0.035<br>[0.087]      |                        |                        |                        |
| Lone parent households with dependent children                | -0.048<br>[0.082]      | 0.023<br>[0.090]       |                        |                        |                        |
| Proportion of population aged 16-74 that are permanently sick | 0.237***<br>[0.068]    | 0.281***<br>[0.070]    | 0.176**<br>[0.077]     | 0.910***<br>[0.343]    | 1.187***<br>[0.331]    |
| Proportion of those aged 16-74 that are long-term unemployed  | 0.085<br>[0.060]       | 0.069<br>[0.067]       |                        |                        |                        |
| Proportion of those aged 16-74 working agriculture            | -0.007                 | -0.012                 |                        |                        |                        |

|    |                                                                        |           |           |           |           |           |
|----|------------------------------------------------------------------------|-----------|-----------|-----------|-----------|-----------|
| 1  |                                                                        |           |           |           |           |           |
| 2  |                                                                        | [0.013]   | [0.010]   |           |           |           |
| 3  | Proportion of those aged 16-74 in professional occupations             | -0.259*** | -0.243*** | -0.244*** | -0.223*** | -0.194*** |
| 4  |                                                                        | [0.072]   | [0.083]   | [0.039]   | [0.040]   | [0.045]   |
| 5  | Proportion of population aged 16-74 that are permanently sick, squared |           |           |           | 0.111**   | 0.138***  |
| 6  |                                                                        |           |           |           | [0.053]   | [0.052]   |
| 7  | Constant                                                               | 8.714***  | 5.636**   | 10.645*** | 10.605*** | 11.286*** |
| 8  |                                                                        | [2.852]   | [2.502]   | [1.379]   | [1.132]   | [1.409]   |
| 9  | Observations                                                           | 150       | 150       | 150       | 150       | 150       |
| 10 | Endogeneity test statistic                                             | 5.928     | 9.295     | 6.089     | 9.906     | 17.683    |
| 11 | Endogeneity p-value                                                    | 0.052     | 0.010     | 0.048     | 0.007     | 0.000     |
| 12 | Hansen-Sargan test statistic                                           | 20.849    | 9.099     | 6.810     | 6.458     | 1.667     |
| 13 | Hansen-Sargan p-value                                                  | 0.000     | 0.003     | 0.009     | 0.011     | 0.197     |
| 14 | Kleibergen-Paap LM test statistic                                      | 9.027     | 6.363     | 16.219    | 15.540    | 16.034    |
| 15 | Kleibergen-Paap p-value                                                | 0.060     | 0.042     | 0.000     | 0.000     | 0.000     |
| 16 | Kleibergen-Paap F statistic                                            | 2.323     | 2.663     | 9.390     | 8.971     | 8.979     |
| 17 | Pesaran-Taylor reset statistic                                         | 1.405     | 6.440     | 0.528     | 0.330     | 0.175     |
| 18 | Pesaran-Taylor p-value                                                 | 0.236     | 0.011     | 0.467     | 0.565     | 0.676     |
| 19 | Sanderdson-Windmejer Public health spend F-statistic                   | 70.796    | 36.048    | 51.105    | 78.626    | 70.796    |
| 20 | Sanderdson-Windmejer Public health spend p-value                       | 0.000     | 0.000     | 0.000     | 0.000     | 0.000     |
| 21 | Sanderdson-Windmejer Healthcare spend F-statistic                      | 13.469    | 3.008     | 4.288     | 13.427    | 13.469    |
| 22 | Sanderdson-Windmejer Healthcare spend p-value                          | 0.000     | 0.021     | 0.016     | 0.000     | 0.000     |

Robust standard errors in brackets

\*\*\* p<0.01, \*\* p<0.05, \* p<0.1

Table A4 First-stage regression results for derivation of preferred specification for public health expenditure with healthcare expenditure, backward selection, 2013/14

|                                                            | (1)                                                                                                                                                                   | (2)                                                                                                                                                                   | (3)                                                                                                                                                                    | (4)                                                                                                                                                                    | (5)                                                                                                                                                                       | (6)                                                                                                                                                                       | (7)                                                                                                                                                             | (8)                                                                                                                                                             | (9)                                                                                                                                                             | (10)                                                                                                                                                            |
|------------------------------------------------------------|-----------------------------------------------------------------------------------------------------------------------------------------------------------------------|-----------------------------------------------------------------------------------------------------------------------------------------------------------------------|------------------------------------------------------------------------------------------------------------------------------------------------------------------------|------------------------------------------------------------------------------------------------------------------------------------------------------------------------|---------------------------------------------------------------------------------------------------------------------------------------------------------------------------|---------------------------------------------------------------------------------------------------------------------------------------------------------------------------|-----------------------------------------------------------------------------------------------------------------------------------------------------------------|-----------------------------------------------------------------------------------------------------------------------------------------------------------------|-----------------------------------------------------------------------------------------------------------------------------------------------------------------|-----------------------------------------------------------------------------------------------------------------------------------------------------------------|
|                                                            | All causes<br>2013/14 PH spend<br>SYLLR 2013/14/15<br>outcome model<br>first-stage<br>weighted<br>OLS<br>backward selection<br>full specification<br>five instruments | All causes<br>2013/14 PB spend<br>SYLLR 2013/14/15<br>outcome model<br>first-stage<br>weighted<br>OLS<br>backward selection<br>full specification<br>five instruments | All causes<br>2013/14 PH spend<br>SYLLR 2013/14/15<br>outcome model<br>first-stage<br>weighted<br>OLS<br>backward selection<br>full specification<br>three instruments | All causes<br>2013/14 PB spend<br>SYLLR 2013/14/15<br>outcome model<br>first-stage<br>weighted<br>OLS<br>backward selection<br>full specification<br>three instruments | All causes<br>2013/14 PH spend<br>SYLLR 2013/14/15<br>outcome model<br>first-stage<br>weighted<br>OLS<br>backward selection<br>derived specification<br>three instruments | All causes<br>2013/14 PB spend<br>SYLLR 2013/14/15<br>outcome model<br>first-stage<br>weighted<br>OLS<br>backward selection<br>derived specification<br>three instruments | All causes<br>2013/14 PH spend<br>SYLLR 2013/14/15<br>outcome model<br>first-stage<br>weighted<br>OLS<br>backward selection<br>derived specification<br>revised | All causes<br>2013/14 PB spend<br>SYLLR 2013/14/15<br>outcome model<br>first-stage<br>weighted<br>OLS<br>backward selection<br>derived specification<br>revised | All causes<br>2013/14 PH spend<br>SYLLR 2013/14/15<br>outcome model<br>first-stage<br>weighted<br>OLS<br>backward selection<br>derived specification<br>revised | All causes<br>2013/14 PB spend<br>SYLLR 2013/14/15<br>outcome model<br>first-stage<br>weighted<br>OLS<br>backward selection<br>derived specification<br>revised |
| DFT index_Public health_1314                               | 0.727***<br>[0.056]                                                                                                                                                   | -0.029<br>[0.021]                                                                                                                                                     | 0.724***<br>[0.057]                                                                                                                                                    | -0.028<br>[0.022]                                                                                                                                                      | 0.748***<br>[0.054]                                                                                                                                                       | 0.018<br>[0.027]                                                                                                                                                          | 0.750***<br>[0.052]                                                                                                                                             | 0.017<br>[0.028]                                                                                                                                                | 0.746***<br>[0.056]                                                                                                                                             | 0.017<br>[0.028]                                                                                                                                                |
| Healthcare_DFT_index                                       | 0.427<br>[0.437]                                                                                                                                                      | 0.351**<br>[0.138]                                                                                                                                                    | 0.360<br>[0.407]                                                                                                                                                       | 0.410***<br>[0.146]                                                                                                                                                    | 0.715**<br>[0.312]                                                                                                                                                        | 0.614***<br>[0.153]                                                                                                                                                       | 0.548*<br>[0.330]                                                                                                                                               | 0.671***<br>[0.161]                                                                                                                                             | 0.403<br>[0.343]                                                                                                                                                | 0.669***<br>[0.155]                                                                                                                                             |
| Prescribing_Age_index                                      | -1.067***<br>[0.271]                                                                                                                                                  | 0.016<br>[0.083]                                                                                                                                                      | -1.201***<br>[0.263]                                                                                                                                                   | 0.037<br>[0.082]                                                                                                                                                       | -1.490***<br>[0.240]                                                                                                                                                      | 0.208***<br>[0.074]                                                                                                                                                       | -1.380***<br>[0.269]                                                                                                                                            | 0.169**<br>[0.078]                                                                                                                                              | -1.233***<br>[0.242]                                                                                                                                            | 0.172**<br>[0.069]                                                                                                                                              |
| MFF Index_Public health_1314                               | 1.264<br>[1.106]                                                                                                                                                      | 0.490<br>[0.378]                                                                                                                                                      |                                                                                                                                                                        |                                                                                                                                                                        |                                                                                                                                                                           |                                                                                                                                                                           |                                                                                                                                                                 |                                                                                                                                                                 |                                                                                                                                                                 |                                                                                                                                                                 |
| HCHS_MFF_index                                             | -1.921<br>[1.232]                                                                                                                                                     | -0.240<br>[0.388]                                                                                                                                                     |                                                                                                                                                                        |                                                                                                                                                                        |                                                                                                                                                                           |                                                                                                                                                                           |                                                                                                                                                                 |                                                                                                                                                                 |                                                                                                                                                                 |                                                                                                                                                                 |
| IMD 2010                                                   | 0.126<br>[0.137]                                                                                                                                                      | -0.018<br>[0.054]                                                                                                                                                     | 0.179<br>[0.134]                                                                                                                                                       | -0.046<br>[0.055]                                                                                                                                                      | 0.132<br>[0.105]                                                                                                                                                          | 0.028<br>[0.057]                                                                                                                                                          | 0.215*<br>[0.112]                                                                                                                                               | -0.000<br>[0.059]                                                                                                                                               | 0.162<br>[0.116]                                                                                                                                                | -0.001<br>[0.056]                                                                                                                                               |
| Proportion of all residents born outside the EU            | 0.014<br>[0.049]                                                                                                                                                      | -0.034**<br>[0.013]                                                                                                                                                   | 0.003<br>[0.049]                                                                                                                                                       | -0.037***<br>[0.013]                                                                                                                                                   | 0.022<br>[0.033]                                                                                                                                                          | -0.042***<br>[0.013]                                                                                                                                                      | 0.019<br>[0.034]                                                                                                                                                | -0.041***<br>[0.013]                                                                                                                                            | -0.021<br>[0.029]                                                                                                                                               | -0.041***<br>[0.013]                                                                                                                                            |
| Proportion of population in white ethnic group             | 0.284<br>[0.175]                                                                                                                                                      | 0.007<br>[0.041]                                                                                                                                                      | 0.322*<br>[0.182]                                                                                                                                                      | -0.025<br>[0.042]                                                                                                                                                      | 0.239**<br>[0.098]                                                                                                                                                        | -0.007<br>[0.041]                                                                                                                                                         | 0.209*<br>[0.109]                                                                                                                                               | 0.004<br>[0.042]                                                                                                                                                |                                                                                                                                                                 |                                                                                                                                                                 |
| Proportion of population providing unpaid care             | 0.024<br>[0.328]                                                                                                                                                      | -0.029<br>[0.105]                                                                                                                                                     | 0.128<br>[0.344]                                                                                                                                                       | -0.080<br>[0.109]                                                                                                                                                      | -0.123<br>[0.221]                                                                                                                                                         | -0.275***<br>[0.088]                                                                                                                                                      | -0.136<br>[0.222]                                                                                                                                               | -0.270***<br>[0.087]                                                                                                                                            | -0.303<br>[0.199]                                                                                                                                               | -0.273***<br>[0.078]                                                                                                                                            |
| Proportion of population aged 16-74 with no qualifications | -0.212<br>[0.154]                                                                                                                                                     | -0.055<br>[0.063]                                                                                                                                                     | -0.252<br>[0.157]                                                                                                                                                      | -0.048<br>[0.064]                                                                                                                                                      |                                                                                                                                                                           |                                                                                                                                                                           |                                                                                                                                                                 |                                                                                                                                                                 |                                                                                                                                                                 |                                                                                                                                                                 |
| Proportion of households without a car                     | 0.095<br>[0.137]                                                                                                                                                      | 0.124***<br>[0.039]                                                                                                                                                   | 0.082<br>[0.140]                                                                                                                                                       | 0.112***<br>[0.040]                                                                                                                                                    |                                                                                                                                                                           |                                                                                                                                                                           |                                                                                                                                                                 |                                                                                                                                                                 |                                                                                                                                                                 |                                                                                                                                                                 |
| Proportion of households that are owner occupied           | -0.042<br>[0.127]                                                                                                                                                     | -0.000<br>[0.049]                                                                                                                                                     | -0.057<br>[0.123]                                                                                                                                                      | -0.036<br>[0.047]                                                                                                                                                      |                                                                                                                                                                           |                                                                                                                                                                           |                                                                                                                                                                 |                                                                                                                                                                 |                                                                                                                                                                 |                                                                                                                                                                 |
| Proportion of h'holds that are one pensioner households    | -0.052<br>[0.283]                                                                                                                                                     | 0.080<br>[0.057]                                                                                                                                                      | -0.042<br>[0.268]                                                                                                                                                      | 0.073<br>[0.060]                                                                                                                                                       |                                                                                                                                                                           |                                                                                                                                                                           |                                                                                                                                                                 |                                                                                                                                                                 |                                                                                                                                                                 |                                                                                                                                                                 |
| Lone parent households with dependent children             | -0.010<br>[0.116]                                                                                                                                                     | -0.162***<br>[0.037]                                                                                                                                                  | -0.061<br>[0.103]                                                                                                                                                      | -0.143***<br>[0.037]                                                                                                                                                   |                                                                                                                                                                           |                                                                                                                                                                           |                                                                                                                                                                 |                                                                                                                                                                 |                                                                                                                                                                 |                                                                                                                                                                 |
| Proportion of aged 16-74 that are permanently sick         | 0.342***<br>[0.128]                                                                                                                                                   | 0.030<br>[0.055]                                                                                                                                                      | 0.331**<br>[0.128]                                                                                                                                                     | 0.034<br>[0.057]                                                                                                                                                       | 0.487***<br>[0.124]                                                                                                                                                       | 0.030<br>[0.066]                                                                                                                                                          | 1.285**<br>[0.572]                                                                                                                                              | -0.246<br>[0.217]                                                                                                                                               | 1.542***<br>[0.492]                                                                                                                                             | -0.242<br>[0.207]                                                                                                                                               |
| Proportion of those 16-74 that are long-term unemployed    | 0.055<br>[0.084]                                                                                                                                                      | 0.089***<br>[0.033]                                                                                                                                                   | 0.056<br>[0.086]                                                                                                                                                       | 0.093***<br>[0.033]                                                                                                                                                    |                                                                                                                                                                           |                                                                                                                                                                           |                                                                                                                                                                 |                                                                                                                                                                 |                                                                                                                                                                 |                                                                                                                                                                 |
| Proportion of those aged 16-74 working agriculture         | -0.038*<br>[0.019]                                                                                                                                                    | 0.019***<br>[0.006]                                                                                                                                                   | -0.034*<br>[0.019]                                                                                                                                                     | 0.015**<br>[0.006]                                                                                                                                                     |                                                                                                                                                                           |                                                                                                                                                                           |                                                                                                                                                                 |                                                                                                                                                                 |                                                                                                                                                                 |                                                                                                                                                                 |
| Proportion of those aged 16-74 in professional occupations | -0.298**<br>[0.132]                                                                                                                                                   | -0.097**<br>[0.047]                                                                                                                                                   | -0.351**<br>[0.135]                                                                                                                                                    | -0.069<br>[0.047]                                                                                                                                                      | -0.157*<br>[0.092]                                                                                                                                                        | -0.063*<br>[0.037]                                                                                                                                                        | -0.105<br>[0.102]                                                                                                                                               | -0.081**<br>[0.038]                                                                                                                                             | -0.079<br>[0.104]                                                                                                                                               | -0.080**<br>[0.037]                                                                                                                                             |
| Proportion of 16-74 that are permanently sick, squared     |                                                                                                                                                                       |                                                                                                                                                                       |                                                                                                                                                                        |                                                                                                                                                                        |                                                                                                                                                                           |                                                                                                                                                                           | 0.132                                                                                                                                                           | -0.046                                                                                                                                                          | 0.161**                                                                                                                                                         | -0.045                                                                                                                                                          |

|              |                     |                     |                     |                     |                     |                     |                                |                                |                                |                                |
|--------------|---------------------|---------------------|---------------------|---------------------|---------------------|---------------------|--------------------------------|--------------------------------|--------------------------------|--------------------------------|
| Constant     | 3.987***<br>[1.015] | 7.244***<br>[0.401] | 3.774***<br>[1.017] | 7.249***<br>[0.399] | 4.584***<br>[0.680] | 6.254***<br>[0.347] | [0.089]<br>5.539***<br>[0.886] | [0.034]<br>5.923***<br>[0.438] | [0.080]<br>5.737***<br>[0.854] | [0.033]<br>5.927***<br>[0.428] |
| Observations | 150                 | 150                 | 150                 | 150                 | 150                 | 150                 | 150                            | 150                            | 150                            | 150                            |

Robust standard errors in brackets  
 \*\*\* p<0.01, \*\* p<0.05, \* p<0.1

For peer review only



1  
2 *With both the public health grant and healthcare as the expenditure variables: forward selection*  
3  
4 The use of backward selection to identify relevant covariates when theory provides little guidance  
5 does not always meet with universal approval, and hence we also report results using forward  
6 selection (see table A5 for the second-stage and table A6 for the first-stage results). Column 1 of  
7 table A5 shows the result with the inclusion of the most significant single control ('permanently  
8 sick') with the same five instruments from the 'full' specification in table A3. The Hansen-Sargan  
9 test statistic suggests that the instrument set is not valid and, in response to this, we re-estimate  
10 without the two insignificant MFF instruments. This re-estimation (see column 2 of table A5)  
11 largely resolves the instrument validity issue. Further re-estimation, with the inclusion of additional  
12 significant controls, generates the results shown in columns 3, 4 and 5. No further additional  
13 significant controls could be found and, as the result in column 5 is both in line with both our  
14 theoretical priors and passes the appropriate statistical tests, this is our preferred specification using  
15 forward selection.  
16  
17  
18  
19  
20  
21  
22  
23  
24  
25  
26  
27  
28  
29  
30  
31  
32  
33  
34  
35  
36  
37  
38  
39  
40  
41  
42  
43  
44  
45  
46  
47  
48  
49  
50  
51  
52  
53  
54  
55  
56  
57  
58  
59  
60

Table A5 Derivation of preferred specification for public health expenditure with healthcare expenditure, forward selection, 2013/14

|                                                               | (1)                    | (2)                    | (3)                    | (4)                    | (5)                    |
|---------------------------------------------------------------|------------------------|------------------------|------------------------|------------------------|------------------------|
|                                                               | All causes             |
|                                                               | 2013/14 PH & PB spend  |
|                                                               | SYLLR 2013/14/15       |
|                                                               | outcome model          |
|                                                               | instrument PH&PB spend |
|                                                               | weighted               | weighted               | weighted               | weighted               | weighted               |
|                                                               | IV second stage        |
|                                                               | forward selection      |
|                                                               | round 1                | round 1                | round 2                | round 3                | round 4                |
| VARIABLES                                                     | five instruments       | three instruments      | three instruments      | three instruments      | three instruments      |
| Public health spend per person, 2013/14                       | -0.006<br>[0.025]      | -0.004<br>[0.028]      | -0.128***<br>[0.040]   | -0.107***<br>[0.041]   | -0.144***<br>[0.040]   |
| Healthcare spend per person, 2013/14                          | -1.012***<br>[0.244]   | -1.394***<br>[0.266]   | -0.949***<br>[0.238]   | -1.190***<br>[0.263]   | -0.837***<br>[0.269]   |
| Proportion of population aged 16-74 that are permanently sick | 0.554***<br>[0.031]    | 0.603***<br>[0.035]    | 0.697***<br>[0.046]    | 0.707***<br>[0.046]    | 0.601***<br>[0.051]    |
| Proportion of population providing unpaid care                |                        |                        | -0.289***<br>[0.081]   | -0.571***<br>[0.134]   | -0.547***<br>[0.122]   |
| Proportion of all residents born outside the EU               |                        |                        |                        | -0.059***<br>[0.021]   | -0.070***<br>[0.019]   |
| Proportion of those aged 16-74 that are long-term unemployed  |                        |                        |                        |                        | 0.156***<br>[0.040]    |
| Constant                                                      | 15.008***<br>[1.756]   | 17.848***<br>[1.913]   | 14.831***<br>[1.719]   | 15.692***<br>[1.742]   | 13.666***<br>[1.762]   |
| Observations                                                  | 150                    | 150                    | 150                    | 150                    | 150                    |
| Endogeneity test statistic                                    | 6.137                  | 17.111                 | 21.226                 | 20.194                 | 22.853                 |
| Endogeneity p-value                                           | 0.046                  | 0.000                  | 0.000                  | 0.000                  | 0.000                  |
| Hansen-Sargan test statistic                                  | 23.780                 | 2.997                  | 0.032                  | 1.702                  | 1.465                  |
| Hansen-Sargan p-value                                         | 0.000                  | 0.083                  | 0.857                  | 0.192                  | 0.226                  |
| Kleibergen-Paap LM test statistic                             | 24.002                 | 19.635                 | 19.756                 | 17.814                 | 18.331                 |
| Kleibergen-Paap p-value                                       | 0.000                  | 0.000                  | 0.000                  | 0.000                  | 0.000                  |
| Kleibergen-Paap F statistic                                   | 7.220                  | 10.806                 | 12.647                 | 11.051                 | 11.627                 |
| Pesaran-Taylor reset statistic                                | 0.073                  | 0.054                  | 0.069                  | 0.005                  | 0.466                  |
| Pesaran-Taylor p-value                                        | 0.788                  | 0.816                  | 0.793                  | 0.946                  | 0.495                  |

|   |                                                      |         |         |        |        |        |
|---|------------------------------------------------------|---------|---------|--------|--------|--------|
| 1 |                                                      |         |         |        |        |        |
| 2 | Sanderdson-Windmejer Public health spend F-statistic | 100.608 | 183.202 | 76.326 | 66.169 | 57.002 |
| 3 | Sanderdson-Windmejer Public health spend p-value     | 0.000   | 0.000   | 0.000  | 0.000  | 0.000  |
| 4 | Sanderdson-Windmejer Healthcare spend F-statistic    | 9.052   | 16.288  | 19.070 | 16.633 | 17.375 |
| 5 | Sanderdson-Windmejer Healthcare spend p-value        | 0.000   | 0.000   | 0.000  | 0.000  | 0.000  |

6 Robust standard errors in brackets

7 \*\*\* p<0.01, \*\* p<0.05, \* p<0.1

8

9

10

11

12

13

14

15

16

17

18

19

20

21

22

23

24

25

26

27

28

29

30

31

32

33

34

35

36

37

38

39

40

41

42

43

44

45

46

For peer review only

Table A6 First-stage regression results for derivation of preferred specification for public health expenditure with healthcare expenditure, forward selection, 2013/14

|                                                   | (1)                  | (2)                 | (3)                  | (4)                 | (5)                  | (6)                  | (7)                  | (8)                  | (9)                  | (10)                 |
|---------------------------------------------------|----------------------|---------------------|----------------------|---------------------|----------------------|----------------------|----------------------|----------------------|----------------------|----------------------|
|                                                   | All causes           | All causes          | All causes           | All causes          | All causes           | All causes           | All causes           | All causes           | All causes           | All causes           |
|                                                   | 2013/14 PH spend     | 2013/14 PB spend    | 2013/14 PH spend     | 2013/14 PB spend    | 2013/14 PH spend     | 2013/14 PB spend     | 2013/14 PH spend     | 2013/14 PB spend     | 2013/14 PH spend     | 2013/14 PB spend     |
|                                                   | SYLLR 2013/14/15     | SYLLR 2013/14/15    | SYLLR 2013/14/15     | SYLLR 2013/14/15    | SYLLR 2013/14/15     | SYLLR 2013/14/15     | SYLLR 2013/14/15     | SYLLR 2013/14/15     | SYLLR 2013/14/15     | SYLLR 2013/14/15     |
|                                                   | outcome model        | outcome model       | outcome model        | outcome model       | outcome model        | outcome model        | outcome model        | outcome model        | outcome model        | outcome model        |
|                                                   | first-stage          | first-stage         | first-stage          | first-stage         | first-stage          | first-stage          | first-stage          | first-stage          | first-stage          | first-stage          |
|                                                   | weighted             | weighted            | weighted             | weighted            | weighted             | weighted             | weighted             | weighted             | weighted             | weighted             |
|                                                   | OLS                  | OLS                 | OLS                  | OLS                 | OLS                  | OLS                  | OLS                  | OLS                  | OLS                  | OLS                  |
|                                                   | forward selection    | forward selection   | forward selection    | forward selection   | forward selection    | forward selection    | forward selection    | forward selection    | forward selection    | forward selection    |
|                                                   | round 1              | round 1             | round 1              | round 1             | round 2              | round 2              | round 3              | round 3              | round 4              | round 4              |
| VARIABLES                                         | five instruments     | five instruments    | three instruments    | three instruments   | three instruments    | three instruments    | three instruments    | three instruments    | three instruments    | three instruments    |
| DFT index_Public health_1314                      | 0.729***<br>[0.055]  | 0.025<br>[0.026]    | 0.728***<br>[0.056]  | 0.026<br>[0.026]    | 0.725***<br>[0.058]  | 0.024<br>[0.025]     | 0.723***<br>[0.061]  | 0.009<br>[0.025]     | 0.715***<br>[0.059]  | 0.007<br>[0.026]     |
| MFF Index_Public health_1314                      | 0.832<br>[1.006]     | 0.550<br>[0.416]    |                      |                     |                      |                      |                      |                      |                      |                      |
| Healthcare_DFT_index                              | 0.633**<br>[0.291]   | 0.579***<br>[0.127] | 0.504*<br>[0.272]    | 0.552***<br>[0.116] | 0.373<br>[0.279]     | 0.457***<br>[0.119]  | 0.383<br>[0.277]     | 0.526***<br>[0.114]  | 0.447<br>[0.285]     | 0.542***<br>[0.115]  |
| Prescribing_Age_index                             | -1.591***<br>[0.146] | 0.143**<br>[0.059]  | -1.530***<br>[0.095] | 0.147***<br>[0.039] | -1.326***<br>[0.199] | 0.296***<br>[0.068]  | -1.338***<br>[0.228] | 0.206***<br>[0.067]  | -1.263***<br>[0.235] | 0.225***<br>[0.070]  |
| HCHS_MFF_index                                    | -1.335<br>[1.119]    | -0.729<br>[0.450]   |                      |                     |                      |                      |                      |                      |                      |                      |
| Proportion of 16-74 that are permanently sick     | 0.639***<br>[0.049]  | 0.065***<br>[0.018] | 0.673***<br>[0.030]  | 0.073***<br>[0.012] | 0.711***<br>[0.042]  | 0.101***<br>[0.016]  | 0.710***<br>[0.044]  | 0.094***<br>[0.015]  | 0.654***<br>[0.054]  | 0.080***<br>[0.022]  |
| Proportion of population providing unpaid care    |                      |                     |                      |                     | -0.260<br>[0.193]    | -0.189***<br>[0.067] | -0.268<br>[0.193]    | -0.250***<br>[0.069] | -0.304<br>[0.193]    | -0.259***<br>[0.071] |
| Proportion of all residents born outside the EU   |                      |                     |                      |                     |                      |                      | -0.004<br>[0.026]    | -0.030***<br>[0.010] | -0.016<br>[0.027]    | -0.033***<br>[0.011] |
| Proportion of 16-74 that are long-term unemployed |                      |                     |                      |                     |                      |                      |                      |                      | 0.091<br>[0.058]     | 0.023<br>[0.028]     |
| Constant                                          | 5.844***<br>[0.157]  | 7.257***<br>[0.057] | 5.958***<br>[0.096]  | 7.286***<br>[0.040] | 5.490***<br>[0.357]  | 6.945***<br>[0.125]  | 5.458***<br>[0.388]  | 6.708***<br>[0.146]  | 5.534***<br>[0.395]  | 6.727***<br>[0.144]  |
| Observations                                      | 150                  | 150                 | 150                  | 150                 | 150                  | 150                  | 150                  | 150                  | 150                  | 150                  |

Robust standard errors in brackets  
 \*\*\* p<0.01, \*\* p<0.05, \* p<0.1

1  
2  
3  
4  
5  
6  
7  
8  
9  
10  
11  
12  
13  
14  
15  
16  
17  
18  
19  
20  
21  
22  
23  
24  
25  
26  
27  
28  
29  
30  
31  
32  
33  
34  
35  
36  
37  
38  
39  
40  
41  
42  
43  
44  
45  
46  
47  
48  
49  
50  
51  
52  
53  
54  
55  
56  
57  
58  
59  
60

## References for appendices

1. NHS England (2015). 2013-14 CCG Programme Budgeting Benchmarking Tool. Available from <https://www.england.nhs.uk/prog-budgeting/> [accessed 22 July, 2020].
2. DH (2018). Personal communication, 07 November.
3. Andrews, M., Elamin, O, Hall, A. R., Kyriakoulis, K. and M Sutton (2017). Inference in the presence of redundant moment conditions and the impact of government health expenditure on health outcomes in England. *Econometric Reviews*, 36(1–3), pp.23–41. Available from <https://www.tandfonline.com/doi/full/10.1080/07474938.2016.1114205> [accessed 22 July, 2020].
4. Small, D.S. (2007). Sensitivity analysis for instrumental variables regression with overidentifying restrictions. *Journal of the American Statistical Association* **102**(479), 1049-1058.

STROBE Statement—Checklist of items that should be included in reports of *cross-sectional studies*

|                              | Item No | Recommendation                                                                                                                                                                                    | Page No |
|------------------------------|---------|---------------------------------------------------------------------------------------------------------------------------------------------------------------------------------------------------|---------|
| <b>Title and abstract</b>    | 1       | (a) Indicate the study's design with a commonly used term in the title or the abstract                                                                                                            | 1, 3    |
|                              |         | (b) Provide in the abstract an informative and balanced summary of what was done and what was found                                                                                               | 3       |
| <b>Introduction</b>          |         |                                                                                                                                                                                                   |         |
| Background/rationale         | 2       | Explain the scientific background and rationale for the investigation being reported                                                                                                              | 5-6     |
| Objectives                   | 3       | State specific objectives, including any prespecified hypotheses                                                                                                                                  | 5-6     |
| <b>Methods</b>               |         |                                                                                                                                                                                                   |         |
| Study design                 | 4       | Present key elements of study design early in the paper                                                                                                                                           | 5-6     |
| Setting                      | 5       | Describe the setting, locations, and relevant dates, including periods of recruitment, exposure, follow-up, and data collection                                                                   | 6-7     |
| Participants                 | 6       | (a) Give the eligibility criteria, and the sources and methods of selection of participants                                                                                                       | 6-7     |
| Variables                    | 7       | Clearly define all outcomes, exposures, predictors, potential confounders, and effect modifiers. Give diagnostic criteria, if applicable                                                          | 10-11   |
| Data sources/<br>measurement | 8*      | For each variable of interest, give sources of data and details of methods of assessment (measurement). Describe comparability of assessment methods if there is more than one group              | 10-11   |
| Bias                         | 9       | Describe any efforts to address potential sources of bias                                                                                                                                         | 7-9     |
| Study size                   | 10      | Explain how the study size was arrived at                                                                                                                                                         | 10      |
| Quantitative variables       | 11      | Explain how quantitative variables were handled in the analyses. If applicable, describe which groupings were chosen and why                                                                      | 10-11   |
| Statistical methods          | 12      | (a) Describe all statistical methods, including those used to control for confounding                                                                                                             | 7-9     |
|                              |         | (b) Describe any methods used to examine subgroups and interactions                                                                                                                               | None    |
|                              |         | (c) Explain how missing data were addressed                                                                                                                                                       | 10      |
|                              |         | (d) If applicable, describe analytical methods taking account of sampling strategy                                                                                                                | n/a     |
|                              |         | (e) Describe any sensitivity analyses                                                                                                                                                             | 11-14   |
| <b>Results</b>               |         |                                                                                                                                                                                                   |         |
| Participants                 | 13*     | (a) Report numbers of individuals at each stage of study—eg numbers potentially eligible, examined for eligibility, confirmed eligible, included in the study, completing follow-up, and analysed | Table 2 |
|                              |         | (b) Give reasons for non-participation at each stage                                                                                                                                              | 10      |
|                              |         | (c) Consider use of a flow diagram                                                                                                                                                                | n/a     |
| Descriptive data             | 14*     | (a) Give characteristics of study participants (eg demographic, clinical, social) and information on exposures and potential confounders                                                          | Table 1 |
|                              |         | (b) Indicate number of participants with missing data for each variable of interest                                                                                                               | 10      |
| Outcome data                 | 15*     | Report numbers of outcome events or summary measures                                                                                                                                              | 10-11   |

1  
2  
3  
4  
5  
6  
7  
8  
9  
10  
11  
12  
13  
14  
15  
16  
17  
18  
19  
20  
21  
22  
23  
24  
25  
26  
27  
28  
29  
30  
31  
32  
33  
34  
35  
36  
37  
38  
39  
40  
41  
42  
43  
44  
45  
46  
47  
48  
49  
50  
51  
52  
53  
54  
55  
56  
57  
58  
59  
60

|                          |    |                                                                                                                                                                                                              |                 |
|--------------------------|----|--------------------------------------------------------------------------------------------------------------------------------------------------------------------------------------------------------------|-----------------|
| Main results             | 16 | (a) Give unadjusted estimates and, if applicable, confounder-adjusted estimates and their precision (eg, 95% confidence interval). Make clear which confounders were adjusted for and why they were included | 11-14 & Table 2 |
|                          |    | (b) Report category boundaries when continuous variables were categorized                                                                                                                                    | n/a             |
|                          |    | (c) If relevant, consider translating estimates of relative risk into absolute risk for a meaningful time period                                                                                             | n/a             |
| Other analyses           | 17 | Report other analyses done—eg analyses of subgroups and interactions, and sensitivity analyses                                                                                                               | 11-14           |
| <b>Discussion</b>        |    |                                                                                                                                                                                                              |                 |
| Key results              | 18 | Summarise key results with reference to study objectives                                                                                                                                                     | 14-15           |
| Limitations              | 19 | Discuss limitations of the study, taking into account sources of potential bias or imprecision. Discuss both direction and magnitude of any potential bias                                                   | 15-16           |
| Interpretation           | 20 | Give a cautious overall interpretation of results considering objectives, limitations, multiplicity of analyses, results from similar studies, and other relevant evidence                                   | 14-16           |
| Generalisability         | 21 | Discuss the generalisability (external validity) of the study results                                                                                                                                        | 15-16           |
| <b>Other information</b> |    |                                                                                                                                                                                                              |                 |
| Funding                  | 22 | Give the source of funding and the role of the funders for the present study and, if applicable, for the original study on which the present article is based                                                | 2               |

\*Give information separately for exposed and unexposed groups.

**Note:** An Explanation and Elaboration article discusses each checklist item and gives methodological background and published examples of transparent reporting. The STROBE checklist is best used in conjunction with this article (freely available on the Web sites of PLoS Medicine at <http://www.plosmedicine.org/>, Annals of Internal Medicine at <http://www.annals.org/>, and Epidemiology at <http://www.epidem.com/>). Information on the STROBE Initiative is available at [www.strobe-statement.org](http://www.strobe-statement.org).
