# Supplementary material for: Is an ounce of prevention worth a pound of cure? A cross-sectional study of the impact of English public health grant on mortality and morbidity
Source: PubMed Central journal article supplement — BMJ Open. 2020 Oct 10;10(10):e036411. doi: 10.1136/bmjopen-2019-036411 (PMC7549458; doi:10.1136/bmjopen-2019-036411), 2020-10-10
Supplement: bmjopen-2019-036411supp001.pdf [file bmjopen-2019-036411supp001.pdf]

**Is an ounce of prevention worth a pound of cure?  
A cross-sectional study of the impact of the  
English public health grant on mortality and morbidity**

**Appendices**

**Appendix A1**

**Is public health expenditure solely preventative?**

One rudimentary guide to the volume of preventative expenditure by CCGs is provided by the programme budgeting data set for 2013/14. This reports a total spend of £411m in the ‘Healthy Individuals’ programme of which £151m is for ‘prescribing in primary care’ and £190m is for ‘community and integrated care’.<sup>1</sup> In principle we could add this expenditure (£411m) to that from the public health grant (£2,500m) to obtain an overall measure of public health spend. However, as the precise set of activities covered by this CCG ‘Healthy Individuals’ expenditure is unclear and there are always issues about how consistently different CCGs allocate activity to different programme budget categories, we prefer to focus on the public health grant as our measure of public health expenditure. We include the ‘Healthy Individuals’ spend as part of the total measure of healthcare (treatment) expenditure. Our estimates of the impact of the public health grant and CCG expenditure will largely reflect ‘prevention’ and ‘treatment’ effects respectively, but we acknowledge that there will be relatively small elements of treatment expenditure in the prevention measure, and relatively small elements of prevention expenditure in the treatment measure.

## Appendix A2

### **On the use of the market forces factor (MFF) as an instrument for public health expenditure**

The local input price index (MFF), which will reflect characteristics of the local (health) economy, may be correlated with unmeasured determinants of mortality. However, we have over a dozen potential socio-economic covariates (including the Index of Multiple Deprivation) in the baseline mortality equation and hence it is difficult to imagine what effect the input price index would detect that our covariates do not. Of course, if a locality gets a larger budget to compensate for the higher cost of supplying healthcare, as happens with the local price index, and this adjustment exactly compensates for additional costs, then there is no reason why this additional spending should improve health because it does not correspond to an increase in real spending. In reality, of course, the cost adjustment will not be perfect. Some local authorities will be over compensated and hence receive 'too much' funding; others will be under compensated and receive 'too small' a budget. This imperfect adjustment for local conditions provides the link between this instrument, expenditure and mortality. The same argument applies to the use of the age index as an instrument for healthcare expenditure discussed later.

## Appendix A3

### Estimation strategy with the inclusion of healthcare expenditure

Initially the health outcome equation (equation 1) is estimated using the strategy described in section 2.2 with public health as the sole health expenditure variable. We then re-estimate equation 1 – using the same strategy – but this time including healthcare expenditure as an additional endogenous regressor. This variable is instrumented in a similar way to public health. However, the identification of the relevant funding rule variables is slightly complicated because of the changes imposed by the Health and Social Care Act 2012. Usually funding formulae are updated every year but the impending abolition of PCTs meant that the weighted capitation formula was frozen for 2012-13, with all PCTs receiving the same (3%) growth rate over their 2011/12 allocations. As CCG responsibilities in 2013/14 differed from those for PCTs (eg they lost responsibility for public health, specialised services, and primary care), there was a baseline exercise in 2012 that stripped out actual expenditure on these components and, for 2013-14, each CCG was given an uplift of 2.3% on these 2012 baselines.<sup>2</sup>

The implication of these developments for this study is that the best funding rule variables we can identify for CCG healthcare expenditure in 2013/14 are drawn from the 2011/12 allocations for PCTs, appropriately mapped to the new (CCG) geography. These allocations reflect three separate funding formulae (one for Hospital and Community Services (HCHS), one for prescribing, and one for primary care), and we select three funding rule variables employed in these formulae which we believe are uncorrelated with mortality. In particular, our funding rule variables for healthcare expenditure are: (i) the DFT for the total allocation to PCTs for 2011/12; (ii) the MFF for the HCHS component of the total allocation; and (iii) the age index from the prescribing cost component of the total allocation. The DFT variable is available from the Department of Health's website at <https://www.networks.nhs.uk/nhsnetworks/health-investment-network/news/2012-13-programme-budgeting-data-is-nowavailable> (accessed 22 July 2020), and the MFF and prescribing cost age indices are available from the exposition books for the 2011/12 allocations at <https://www.gov.uk/government/publications/exposition-book-2011-2012> (accessed 22 July 2020).

A recent study provided no explicit arguments in support of these instruments for healthcare expenditure but this omission is easily remedied.<sup>3</sup> First, our measure of mortality and the prescribing cost age index instrument are both standardised for age, and so the age index is unlikely to be correlated with the error from equation (1). Second, and as already noted when discussing the instruments for public health expenditure, the local input price index will reflect characteristics of

the local (health) economy and these might be correlated with unmeasured determinants of mortality. However, we have over a dozen potential socio-economic covariates in the baseline mortality equation and hence it is difficult to imagine what effect the MFF would detect that our covariates do not. Third, the DFT variable for healthcare allocations will reflect the various funding formulae and 'pace of change' policies implemented under several governments of various political persuasions over the past thirty years. The 'pace of change' and the consequent DFT are policy choices but it is not obvious that the latter will be endogenous with respect to mortality; and, as noted for the instruments for public health expenditure, any correlation between our instruments and the error term in equation (1) is likely to be detected by the Hansen-Sargan test.

## Appendix A4

### Extended presentation of results

#### *With the public health grant as the only expenditure variable*

Estimation of the health outcome equation (equation 1) with public health as the sole expenditure variable generates the result shown in column 1 of table A1. The corresponding first-stage result is in column 1 of table A2. Application of the backward selection process generates the more parsimonious specification shown in column 2 of table A1. Public health expenditure has the anticipated negative association with mortality but this specification fails the reset test and the instrument set is invalid (the Hansen-Sargan test statistic  $p$ value $<0.100$ ). The addition of IMD 2010 squared to the specification resolves the reset test but not the instrument validity issue (column 3). The result in column 4 omits that instrument (the MFF index) which is the most significant when added as a control to the second-stage equation. The significant positive coefficient (0.252) on the ‘white ethnicity’ variable might reflect a lifestyle effect but, in the interests of clarity, we re-estimate without this variable and obtain the result shown in column 5. The coefficient on the ‘permanently sick’ variable increases considerably (from 0.265 to 0.475) and the coefficient on the ‘working in agriculture’ variable is no longer significant. Re-estimation without the latter variable generates our preferred specification shown in column 6. In this, public health expenditure has a modest but statistically significant negative association with mortality, expenditure is endogenous, there is no evidence of weak instruments (the Kleibergen-Paap F statistic exceeds the rule-of-thumb threshold value ( $=10$ )), and the specification passes the reset test.

Table A1 Derivation of preferred specification for public health expenditure, second-stage results, 2013/14

|                                                               | (1)                 | (2)                 | (3)                 | (4)                 | (5)                 | (6)                 |
|---------------------------------------------------------------|---------------------|---------------------|---------------------|---------------------|---------------------|---------------------|
|                                                               | All causes          |
|                                                               | 2013/14 PH spend    |
|                                                               | SYLLR 2013/14/15    |
|                                                               | outcome model       |
|                                                               | instrument PH spend |
|                                                               | weighted            | weighted            | weighted            | weighted            | weighted            | weighted            |
|                                                               | IV second stage     |
|                                                               | full specification  | new derivation      |
|                                                               |                     |                     | revised1            | revised2            | revised2            | revised2            |
| VARIABLES                                                     |                     |                     |                     |                     | SA_1                | SA_2                |
| Public health spend per person                                | -0.084**            | -0.122***           | -0.108**            | -0.119***           | -0.116**            | -0.115**            |
|                                                               | [0.041]             | [0.046]             | [0.043]             | [0.043]             | [0.047]             | [0.048]             |
| IMD 2010                                                      | 0.203***            | 0.152**             | -0.271*             | -0.374**            | -0.509***           | -0.505***           |
|                                                               | [0.075]             | [0.063]             | [0.141]             | [0.146]             | [0.163]             | [0.157]             |
| Proportion of all residents born outside the EU               | -0.016              |                     |                     |                     |                     |                     |
|                                                               | [0.018]             |                     |                     |                     |                     |                     |
| Proportion of population in white ethnic group                | 0.246***            | 0.261***            | 0.249***            | 0.252***            |                     |                     |
|                                                               | [0.060]             | [0.039]             | [0.038]             | [0.038]             |                     |                     |
| Proportion of population providing unpaid care                | -0.439***           | -0.346***           | -0.271***           | -0.235***           | -0.235***           | -0.231**            |
|                                                               | [0.167]             | [0.088]             | [0.083]             | [0.084]             | [0.090]             | [0.091]             |
| Proportion of population aged 16-74 with no qualifications    | -0.034              |                     |                     |                     |                     |                     |
|                                                               | [0.112]             |                     |                     |                     |                     |                     |
| Proportion of households without a car                        | -0.062              |                     |                     |                     |                     |                     |
|                                                               | [0.072]             |                     |                     |                     |                     |                     |
| Proportion of households that are owner occupied              | 0.129*              |                     |                     |                     |                     |                     |
|                                                               | [0.071]             |                     |                     |                     |                     |                     |
| Proportion of households that are one pensioner households    | -0.082              |                     |                     |                     |                     |                     |
|                                                               | [0.084]             |                     |                     |                     |                     |                     |
| Lone parent households with dependent children                | 0.056               |                     |                     |                     |                     |                     |
|                                                               | [0.060]             |                     |                     |                     |                     |                     |
| Proportion of population aged 16-74 that are permanently sick | 0.315***            | 0.319***            | 0.284***            | 0.265***            | 0.475***            | 0.475***            |
|                                                               | [0.070]             | [0.077]             | [0.071]             | [0.072]             | [0.067]             | [0.068]             |
| Proportion of those aged 16-74 that are long-term unemployed  | 0.039               |                     |                     |                     |                     |                     |
|                                                               | [0.057]             |                     |                     |                     |                     |                     |
| Proportion of those aged 16-74 working agriculture            | -0.015              | -0.025***           | -0.020***           | -0.016**            | 0.001               |                     |
|                                                               | [0.010]             | [0.007]             | [0.007]             | [0.007]             | [0.007]             |                     |
| Proportion of those aged 16-74 in professional occupations    | -0.201***           | -0.268***           | -0.243***           | -0.230***           | -0.204***           | -0.205***           |
|                                                               | [0.077]             | [0.044]             | [0.046]             | [0.047]             | [0.050]             | [0.049]             |

|                                   |          |          |          |          |          |          |
|-----------------------------------|----------|----------|----------|----------|----------|----------|
| IMD 2010 Squared                  |          |          | 0.078*** | 0.100*** | 0.093*** | 0.092*** |
|                                   |          |          | [0.026]  | [0.027]  | [0.029]  | [0.028]  |
| Constant                          | 5.532*** | 5.895*** | 6.514*** | 6.710*** | 7.941*** | 7.936*** |
|                                   | [0.649]  | [0.349]  | [0.393]  | [0.402]  | [0.397]  | [0.402]  |
| Observations                      | 151      | 151      | 151      | 151      | 151      | 151      |
| Endogeneity test statistic        | 11.369   | 10.449   | 8.572    | 15.109   | 13.881   | 10.579   |
| Endogeneity p-value               | 0.001    | 0.001    | 0.003    | 0.000    | 0.000    | 0.001    |
| Hansen-Sargan test statistic      | 14.750   | 10.957   | 14.408   |          |          |          |
| Hansen-Sargan p-value             | 0.000    | 0.001    | 0.000    |          |          |          |
| Kleibergen-Paap LM test statistic | 26.821   | 34.909   | 35.502   | 34.884   | 34.868   | 32.762   |
| Kleibergen-Paap p-value           | 0.000    | 0.000    | 0.000    | 0.000    | 0.000    | 0.000    |
| Kleibergen-Paap F statistic       | 69.320   | 88.578   | 99.555   | 192.280  | 185.421  | 120.521  |
| Pesaran-Taylor reset statistic    | 10.116   | 6.248    | 0.599    | 0.469    | 2.422    | 2.456    |
| Pesaran-Taylor p-value            | 0.001    | 0.012    | 0.439    | 0.493    | 0.120    | 0.117    |

---

Robust standard errors in brackets

\*\*\* p<0.01, \*\* p<0.05, \* p<0.1

Table A2 First-stage regression results for derivation of preferred specification for public health expenditure, 2013/14

|                                                               | (1)                  | (2)                  | (3)                  | (4)                  | (5)                  | (6)                  |
|---------------------------------------------------------------|----------------------|----------------------|----------------------|----------------------|----------------------|----------------------|
|                                                               | All causes           |
|                                                               | 2013/14 PH spend     |
|                                                               | SYLLR 2013/14/15     |
|                                                               | outcome model        |
|                                                               | first-stage          | first-stage          | first-stage          | first-stage          | first-stage          | first-stage          |
|                                                               | weighted             | weighted             | weighted             | weighted             | weighted             | weighted             |
|                                                               | OLS                  | OLS                  | OLS                  | OLS                  | OLS                  | OLS                  |
|                                                               | full specification   | new derivation       |
| VARIABLES                                                     |                      |                      | revised1             | revised2             | revised2             | revised2             |
|                                                               |                      |                      |                      |                      | SA_1                 | SA_2                 |
| DFT index_Public health_1314                                  | 0.729***<br>[0.062]  | 0.747***<br>[0.056]  | 0.762***<br>[0.054]  | 0.759***<br>[0.055]  | 0.759***<br>[0.056]  | 0.739***<br>[0.067]  |
| MFF Index_Public health_1314                                  | -0.655*<br>[0.350]   | -0.559<br>[0.348]    | -0.565<br>[0.352]    |                      |                      |                      |
| IMD 2010                                                      | 0.122<br>[0.137]     | 0.139<br>[0.113]     | -0.590<br>[0.388]    | -0.548<br>[0.357]    | -0.599*<br>[0.357]   | -0.931**<br>[0.388]  |
| Proportion of all residents born outside the EU               | 0.031<br>[0.050]     |                      |                      |                      |                      |                      |
| Proportion of population in white ethnic group                | 0.309*<br>[0.178]    | 0.020<br>[0.083]     | 0.028<br>[0.080]     | 0.095<br>[0.071]     |                      |                      |
| Proportion of population providing unpaid care                | -0.113<br>[0.393]    | -1.099***<br>[0.161] | -1.008***<br>[0.167] | -0.903***<br>[0.151] | -0.904***<br>[0.155] | -1.150***<br>[0.180] |
| Proportion of population aged 16-74 with no qualifications    | -0.277<br>[0.185]    |                      |                      |                      |                      |                      |
| Proportion of households without a car                        | 0.141<br>[0.136]     |                      |                      |                      |                      |                      |
| Proportion of households that are owner occupied              | -0.179<br>[0.157]    |                      |                      |                      |                      |                      |
| Proportion of households that are one pensioner households    | -0.439*<br>[0.238]   |                      |                      |                      |                      |                      |
| Lone parent households with dependent children                | -0.001<br>[0.112]    |                      |                      |                      |                      |                      |
| Proportion of population aged 16-74 that are permanently sick | 0.326**<br>[0.133]   | 0.532***<br>[0.120]  | 0.489***<br>[0.124]  | 0.471***<br>[0.124]  | 0.550***<br>[0.103]  | 0.573***<br>[0.116]  |
| Proportion of those aged 16-74 that are long-term unemployed  | 0.046<br>[0.099]     |                      |                      |                      |                      |                      |
| Proportion of those aged 16-74 working agriculture            | -0.070***<br>[0.021] | -0.080***<br>[0.013] | -0.074***<br>[0.013] | -0.066***<br>[0.012] | -0.060***<br>[0.011] |                      |



|                                                            |                     |                     |                     |                     |                     |                     |
|------------------------------------------------------------|---------------------|---------------------|---------------------|---------------------|---------------------|---------------------|
| Proportion of those aged 16-74 in professional occupations | -0.339**<br>[0.146] | -0.100<br>[0.095]   | -0.052<br>[0.096]   | -0.115<br>[0.098]   | -0.105<br>[0.096]   | -0.008<br>[0.100]   |
| IMD 2010 Squared                                           |                     |                     | 0.133**<br>[0.064]  | 0.132**<br>[0.059]  | 0.129**<br>[0.060]  | 0.204***<br>[0.064] |
| Constant                                                   | 2.542**<br>[1.116]  | 2.020***<br>[0.578] | 3.146***<br>[0.829] | 3.191***<br>[0.804] | 3.658***<br>[0.683] | 3.929***<br>[0.753] |
| Observations                                               | 151                 | 151                 | 151                 | 151                 | 151                 | 151                 |

Robust standard errors in brackets

\*\*\* p<0.01, \*\* p<0.05, \* p<0.1

*With both the public health grant and healthcare as the expenditure variables: backward selection*

Estimation of equation (1) with both public health and healthcare expenditure as endogenous regressors generates the result shown in column 1 of table A3. This specification includes five instruments (two for public health expenditure and three for healthcare expenditure). The corresponding first-stage results can be found in column 1 (for public health) and in column 2 (for healthcare) in table A4.

Some authors have expressed concern about the inclusion of weak instruments,<sup>4</sup> and hence we re-estimate the ‘full’ specification without the two insignificant MFF instruments (see column 2 of table A3). Application of the backward selection process generates the more parsimonious result shown in column 3 but the instrument set is invalid at the 1% level. On checking to see if any of the deleted variables or their squared values is significant when added as a control to the second-stage, we found that the ‘permanently sick’ variable squared is both significant and resolves the weak instrument issue for healthcare expenditure. Again in the interests of clarity, we tried re-estimating the specification in column 4 without the ‘white ethnicity’ variable. This generates the plausible result shown in column 5 where both expenditure variables have the anticipated negative association with mortality, they are endogenous, the instrument set is valid, and the instrument sets for both endogenous variables are individually strong (the Sanderson-Windmeijer F-statistics are around ten or better).

Table A3 Derivation of preferred specification for public health expenditure with healthcare expenditure, backward selection, 2013/14

|                                                               | (1)                    | (2)                    | (3)                    | (4)                    | (5)                    |
|---------------------------------------------------------------|------------------------|------------------------|------------------------|------------------------|------------------------|
|                                                               | All causes             |
|                                                               | 2013/14 PH & PB spend  |
|                                                               | SYLLR 2013/14/15       |
|                                                               | outcome model          |
|                                                               | instrument PH&PB spend |
|                                                               | weighted               | weighted               | weighted               | weighted               | weighted               |
|                                                               | IV second stage        |
|                                                               | backward selection     |
|                                                               | full specification     | full specification     | derived specification  | derived specification  | derived specification  |
| VARIABLES                                                     | five instruments       | three instruments      | three instruments      | revised                | revised                |
| Public health spend per person, 2013/14                       | -0.024<br>[0.037]      | -0.052<br>[0.038]      | 0.010<br>[0.033]       | -0.037<br>[0.034]      | -0.081**<br>[0.034]    |
| Healthcare spend per person, 2013/14                          | -0.551<br>[0.413]      | -0.076<br>[0.355]      | -0.869***<br>[0.233]   | -0.662***<br>[0.204]   | -0.672***<br>[0.233]   |
| IMD 2010                                                      | 0.253***<br>[0.062]    | 0.231***<br>[0.078]    | 0.271***<br>[0.067]    | 0.281***<br>[0.063]    | 0.221***<br>[0.063]    |
| Proportion of all residents born outside the EU               | -0.043*<br>[0.024]     | -0.023<br>[0.023]      | -0.054***<br>[0.020]   | -0.042**<br>[0.019]    | -0.084***<br>[0.019]   |
| Proportion of population in white ethnic group                | 0.226***<br>[0.051]    | 0.237***<br>[0.058]    | 0.192***<br>[0.034]    | 0.185***<br>[0.036]    |                        |
| Proportion of population providing unpaid care                | -0.399***<br>[0.144]   | -0.466***<br>[0.165]   | -0.376***<br>[0.099]   | -0.372***<br>[0.096]   | -0.479***<br>[0.096]   |
| Proportion of population aged 16-74 with no qualifications    | -0.111<br>[0.105]      | -0.089<br>[0.124]      |                        |                        |                        |
| Proportion of households without a car                        | -0.033<br>[0.087]      | -0.091<br>[0.083]      |                        |                        |                        |
| Proportion of households that are owner occupied              | 0.090<br>[0.075]       | 0.103<br>[0.074]       |                        |                        |                        |
| Proportion of households that are one pensioner households    | -0.023<br>[0.079]      | -0.035<br>[0.087]      |                        |                        |                        |
| Lone parent households with dependent children                | -0.048<br>[0.082]      | 0.023<br>[0.090]       |                        |                        |                        |
| Proportion of population aged 16-74 that are permanently sick | 0.237***<br>[0.068]    | 0.281***<br>[0.070]    | 0.176**<br>[0.077]     | 0.910***<br>[0.343]    | 1.187***<br>[0.331]    |
| Proportion of those aged 16-74 that are long-term unemployed  | 0.085<br>[0.060]       | 0.069<br>[0.067]       |                        |                        |                        |
| Proportion of those aged 16-74 working agriculture            | -0.007                 | -0.012                 |                        |                        |                        |

|                                                                        |           |           |           |           |           |
|------------------------------------------------------------------------|-----------|-----------|-----------|-----------|-----------|
|                                                                        | [0.013]   | [0.010]   |           |           |           |
| Proportion of those aged 16-74 in professional occupations             | -0.259*** | -0.243*** | -0.244*** | -0.223*** | -0.194*** |
|                                                                        | [0.072]   | [0.083]   | [0.039]   | [0.040]   | [0.045]   |
| Proportion of population aged 16-74 that are permanently sick, squared |           |           |           | 0.111**   | 0.138***  |
|                                                                        |           |           |           | [0.053]   | [0.052]   |
| Constant                                                               | 8.714***  | 5.636**   | 10.645*** | 10.605*** | 11.286*** |
|                                                                        | [2.852]   | [2.502]   | [1.379]   | [1.132]   | [1.409]   |
| Observations                                                           | 150       | 150       | 150       | 150       | 150       |
| Endogeneity test statistic                                             | 5.928     | 9.295     | 6.089     | 9.906     | 17.683    |
| Endogeneity p-value                                                    | 0.052     | 0.010     | 0.048     | 0.007     | 0.000     |
| Hansen-Sargan test statistic                                           | 20.849    | 9.099     | 6.810     | 6.458     | 1.667     |
| Hansen-Sargan p-value                                                  | 0.000     | 0.003     | 0.009     | 0.011     | 0.197     |
| Kleibergen-Paap LM test statistic                                      | 9.027     | 6.363     | 16.219    | 15.540    | 16.034    |
| Kleibergen-Paap p-value                                                | 0.060     | 0.042     | 0.000     | 0.000     | 0.000     |
| Kleibergen-Paap F statistic                                            | 2.323     | 2.663     | 9.390     | 8.971     | 8.979     |
| Pesaran-Taylor reset statistic                                         | 1.405     | 6.440     | 0.528     | 0.330     | 0.175     |
| Pesaran-Taylor p-value                                                 | 0.236     | 0.011     | 0.467     | 0.565     | 0.676     |
| Sanderdson-Windmejer Public health spend F-statistic                   | 70.796    | 36.048    | 51.105    | 78.626    | 70.796    |
| Sanderdson-Windmejer Public health spend p-value                       | 0.000     | 0.000     | 0.000     | 0.000     | 0.000     |
| Sanderdson-Windmejer Healthcare spend F-statistic                      | 13.469    | 3.008     | 4.288     | 13.427    | 13.469    |
| Sanderdson-Windmejer Healthcare spend p-value                          | 0.000     | 0.021     | 0.016     | 0.000     | 0.000     |

Robust standard errors in brackets

\*\*\* p<0.01, \*\* p<0.05, \* p<0.1

Table A4 First-stage regression results for derivation of preferred specification for public health expenditure with healthcare expenditure, backward selection, 2013/14

| VARIABLES                                                  | (1)<br>All causes<br>2013/14 PH spend<br>SYLLR 2013/14/15<br>outcome model<br>first-stage<br>weighted<br>OLS<br>backward selection<br>full specification<br>five instruments | (2)<br>All causes<br>2013/14 PB spend<br>SYLLR 2013/14/15<br>outcome model<br>first-stage<br>weighted<br>OLS<br>backward selection<br>full specification<br>five instruments | (3)<br>All causes<br>2013/14 PH spend<br>SYLLR 2013/14/15<br>outcome model<br>first-stage<br>weighted<br>OLS<br>backward selection<br>full specification<br>three instruments | (4)<br>All causes<br>2013/14 PB spend<br>SYLLR 2013/14/15<br>outcome model<br>first-stage<br>weighted<br>OLS<br>backward selection<br>full specification<br>three instruments | (5)<br>All causes<br>2013/14 PH spend<br>SYLLR 2013/14/15<br>outcome model<br>first-stage<br>weighted<br>OLS<br>backward selection<br>derived specification<br>three instruments | (6)<br>All causes<br>2013/14 PB spend<br>SYLLR 2013/14/15<br>outcome model<br>first-stage<br>weighted<br>OLS<br>backward selection<br>derived specification<br>three instruments | (7)<br>All causes<br>2013/14 PH spend<br>SYLLR 2013/14/15<br>outcome model<br>first-stage<br>weighted<br>OLS<br>backward selection<br>derived specification<br>revised | (8)<br>All causes<br>2013/14 PB spend<br>SYLLR 2013/14/15<br>outcome model<br>first-stage<br>weighted<br>OLS<br>backward selection<br>derived specification<br>revised | (9)<br>All causes<br>2013/14 PH spend<br>SYLLR 2013/14/15<br>outcome model<br>first-stage<br>weighted<br>OLS<br>backward selection<br>derived specification<br>revised | (10)<br>All causes<br>2013/14 PB spend<br>SYLLR 2013/14/15<br>outcome model<br>first-stage<br>weighted<br>OLS<br>backward selection<br>derived specification<br>revised |
|------------------------------------------------------------|------------------------------------------------------------------------------------------------------------------------------------------------------------------------------|------------------------------------------------------------------------------------------------------------------------------------------------------------------------------|-------------------------------------------------------------------------------------------------------------------------------------------------------------------------------|-------------------------------------------------------------------------------------------------------------------------------------------------------------------------------|----------------------------------------------------------------------------------------------------------------------------------------------------------------------------------|----------------------------------------------------------------------------------------------------------------------------------------------------------------------------------|------------------------------------------------------------------------------------------------------------------------------------------------------------------------|------------------------------------------------------------------------------------------------------------------------------------------------------------------------|------------------------------------------------------------------------------------------------------------------------------------------------------------------------|-------------------------------------------------------------------------------------------------------------------------------------------------------------------------|
| DFT index_Public health_1314                               | 0.727***<br>[0.056]                                                                                                                                                          | -0.029<br>[0.021]                                                                                                                                                            | 0.724***<br>[0.057]                                                                                                                                                           | -0.028<br>[0.022]                                                                                                                                                             | 0.748***<br>[0.054]                                                                                                                                                              | 0.018<br>[0.027]                                                                                                                                                                 | 0.750***<br>[0.052]                                                                                                                                                    | 0.017<br>[0.028]                                                                                                                                                       | 0.746***<br>[0.056]                                                                                                                                                    | 0.017<br>[0.028]                                                                                                                                                        |
| Healthcare_DFT_index                                       | 0.427<br>[0.437]                                                                                                                                                             | 0.351**<br>[0.138]                                                                                                                                                           | 0.360<br>[0.407]                                                                                                                                                              | 0.410***<br>[0.146]                                                                                                                                                           | 0.715**<br>[0.312]                                                                                                                                                               | 0.614***<br>[0.153]                                                                                                                                                              | 0.548*<br>[0.330]                                                                                                                                                      | 0.671***<br>[0.161]                                                                                                                                                    | 0.403<br>[0.343]                                                                                                                                                       | 0.669***<br>[0.155]                                                                                                                                                     |
| Prescribing_Age_index                                      | -1.067***<br>[0.271]                                                                                                                                                         | 0.016<br>[0.083]                                                                                                                                                             | -1.201***<br>[0.263]                                                                                                                                                          | 0.037<br>[0.082]                                                                                                                                                              | -1.490***<br>[0.240]                                                                                                                                                             | 0.208***<br>[0.074]                                                                                                                                                              | -1.380***<br>[0.269]                                                                                                                                                   | 0.169**<br>[0.078]                                                                                                                                                     | -1.233***<br>[0.242]                                                                                                                                                   | 0.172**<br>[0.069]                                                                                                                                                      |
| MFF Index_Public health_1314                               | 1.264<br>[1.106]                                                                                                                                                             | 0.490<br>[0.378]                                                                                                                                                             |                                                                                                                                                                               |                                                                                                                                                                               |                                                                                                                                                                                  |                                                                                                                                                                                  |                                                                                                                                                                        |                                                                                                                                                                        |                                                                                                                                                                        |                                                                                                                                                                         |
| HCHS_MFF_index                                             | -1.921<br>[1.232]                                                                                                                                                            | -0.240<br>[0.388]                                                                                                                                                            |                                                                                                                                                                               |                                                                                                                                                                               |                                                                                                                                                                                  |                                                                                                                                                                                  |                                                                                                                                                                        |                                                                                                                                                                        |                                                                                                                                                                        |                                                                                                                                                                         |
| IMD 2010                                                   | 0.126<br>[0.137]                                                                                                                                                             | -0.018<br>[0.054]                                                                                                                                                            | 0.179<br>[0.134]                                                                                                                                                              | -0.046<br>[0.055]                                                                                                                                                             | 0.132<br>[0.105]                                                                                                                                                                 | 0.028<br>[0.057]                                                                                                                                                                 | 0.215*<br>[0.112]                                                                                                                                                      | -0.000<br>[0.059]                                                                                                                                                      | 0.162<br>[0.116]                                                                                                                                                       | -0.001<br>[0.056]                                                                                                                                                       |
| Proportion of all residents born outside the EU            | 0.014<br>[0.049]                                                                                                                                                             | -0.034**<br>[0.013]                                                                                                                                                          | 0.003<br>[0.049]                                                                                                                                                              | -0.037***<br>[0.013]                                                                                                                                                          | 0.022<br>[0.033]                                                                                                                                                                 | -0.042***<br>[0.013]                                                                                                                                                             | 0.019<br>[0.034]                                                                                                                                                       | -0.041***<br>[0.013]                                                                                                                                                   | -0.021<br>[0.029]                                                                                                                                                      | -0.041***<br>[0.013]                                                                                                                                                    |
| Proportion of population in white ethnic group             | 0.284<br>[0.175]                                                                                                                                                             | 0.007<br>[0.041]                                                                                                                                                             | 0.322*<br>[0.182]                                                                                                                                                             | -0.025<br>[0.042]                                                                                                                                                             | 0.239**<br>[0.098]                                                                                                                                                               | -0.007<br>[0.041]                                                                                                                                                                | 0.209*<br>[0.109]                                                                                                                                                      | 0.004<br>[0.042]                                                                                                                                                       |                                                                                                                                                                        |                                                                                                                                                                         |
| Proportion of population providing unpaid care             | 0.024<br>[0.328]                                                                                                                                                             | -0.029<br>[0.105]                                                                                                                                                            | 0.128<br>[0.344]                                                                                                                                                              | -0.080<br>[0.109]                                                                                                                                                             | -0.123<br>[0.221]                                                                                                                                                                | -0.275***<br>[0.088]                                                                                                                                                             | -0.136<br>[0.222]                                                                                                                                                      | -0.270***<br>[0.087]                                                                                                                                                   | -0.303<br>[0.199]                                                                                                                                                      | -0.273***<br>[0.078]                                                                                                                                                    |
| Proportion of population aged 16-74 with no qualifications | -0.212<br>[0.154]                                                                                                                                                            | -0.055<br>[0.063]                                                                                                                                                            | -0.252<br>[0.157]                                                                                                                                                             | -0.048<br>[0.064]                                                                                                                                                             |                                                                                                                                                                                  |                                                                                                                                                                                  |                                                                                                                                                                        |                                                                                                                                                                        |                                                                                                                                                                        |                                                                                                                                                                         |
| Proportion of households without a car                     | 0.095<br>[0.137]                                                                                                                                                             | 0.124***<br>[0.039]                                                                                                                                                          | 0.082<br>[0.140]                                                                                                                                                              | 0.112***<br>[0.040]                                                                                                                                                           |                                                                                                                                                                                  |                                                                                                                                                                                  |                                                                                                                                                                        |                                                                                                                                                                        |                                                                                                                                                                        |                                                                                                                                                                         |
| Proportion of households that are owner occupied           | -0.042<br>[0.127]                                                                                                                                                            | -0.000<br>[0.049]                                                                                                                                                            | -0.057<br>[0.123]                                                                                                                                                             | -0.036<br>[0.047]                                                                                                                                                             |                                                                                                                                                                                  |                                                                                                                                                                                  |                                                                                                                                                                        |                                                                                                                                                                        |                                                                                                                                                                        |                                                                                                                                                                         |
| Proportion of h'holds that are one pensioner households    | -0.052<br>[0.283]                                                                                                                                                            | 0.080<br>[0.057]                                                                                                                                                             | -0.042<br>[0.268]                                                                                                                                                             | 0.073<br>[0.060]                                                                                                                                                              |                                                                                                                                                                                  |                                                                                                                                                                                  |                                                                                                                                                                        |                                                                                                                                                                        |                                                                                                                                                                        |                                                                                                                                                                         |
| Lone parent households with dependent children             | -0.010<br>[0.116]                                                                                                                                                            | -0.162***<br>[0.037]                                                                                                                                                         | -0.061<br>[0.103]                                                                                                                                                             | -0.143***<br>[0.037]                                                                                                                                                          |                                                                                                                                                                                  |                                                                                                                                                                                  |                                                                                                                                                                        |                                                                                                                                                                        |                                                                                                                                                                        |                                                                                                                                                                         |
| Proportion of aged 16-74 that are permanently sick         | 0.342***<br>[0.128]                                                                                                                                                          | 0.030<br>[0.055]                                                                                                                                                             | 0.331**<br>[0.128]                                                                                                                                                            | 0.034<br>[0.057]                                                                                                                                                              | 0.487***<br>[0.124]                                                                                                                                                              | 0.030<br>[0.066]                                                                                                                                                                 | 1.285**<br>[0.572]                                                                                                                                                     | -0.246<br>[0.217]                                                                                                                                                      | 1.542***<br>[0.492]                                                                                                                                                    | -0.242<br>[0.207]                                                                                                                                                       |
| Proportion of those 16-74 that are long-term unemployed    | 0.055<br>[0.084]                                                                                                                                                             | 0.089***<br>[0.033]                                                                                                                                                          | 0.056<br>[0.086]                                                                                                                                                              | 0.093***<br>[0.033]                                                                                                                                                           |                                                                                                                                                                                  |                                                                                                                                                                                  |                                                                                                                                                                        |                                                                                                                                                                        |                                                                                                                                                                        |                                                                                                                                                                         |
| Proportion of those aged 16-74 working agriculture         | -0.038*<br>[0.019]                                                                                                                                                           | 0.019***<br>[0.006]                                                                                                                                                          | -0.034*<br>[0.019]                                                                                                                                                            | 0.015**<br>[0.006]                                                                                                                                                            |                                                                                                                                                                                  |                                                                                                                                                                                  |                                                                                                                                                                        |                                                                                                                                                                        |                                                                                                                                                                        |                                                                                                                                                                         |
| Proportion of those aged 16-74 in professional occupations | -0.298**<br>[0.132]                                                                                                                                                          | -0.097**<br>[0.047]                                                                                                                                                          | -0.351**<br>[0.135]                                                                                                                                                           | -0.069<br>[0.047]                                                                                                                                                             | -0.157*<br>[0.092]                                                                                                                                                               | -0.063*<br>[0.037]                                                                                                                                                               | -0.105<br>[0.102]                                                                                                                                                      | -0.081**<br>[0.038]                                                                                                                                                    | -0.079<br>[0.104]                                                                                                                                                      | -0.080**<br>[0.037]                                                                                                                                                     |
| Proportion of 16-74 that are permanently sick, squared     |                                                                                                                                                                              |                                                                                                                                                                              |                                                                                                                                                                               |                                                                                                                                                                               |                                                                                                                                                                                  |                                                                                                                                                                                  | 0.132<br>[0.102]                                                                                                                                                       | -0.046<br>[0.038]                                                                                                                                                      | 0.161**<br>[0.104]                                                                                                                                                     | -0.045<br>[0.037]                                                                                                                                                       |

---

|              |                     |                     |                     |                     |                     |                     |                                |                                |                                |                                |
|--------------|---------------------|---------------------|---------------------|---------------------|---------------------|---------------------|--------------------------------|--------------------------------|--------------------------------|--------------------------------|
| Constant     | 3.987***<br>[1.015] | 7.244***<br>[0.401] | 3.774***<br>[1.017] | 7.249***<br>[0.399] | 4.584***<br>[0.680] | 6.254***<br>[0.347] | [0.089]<br>5.539***<br>[0.886] | [0.034]<br>5.923***<br>[0.438] | [0.080]<br>5.737***<br>[0.854] | [0.033]<br>5.927***<br>[0.428] |
| Observations | 150                 | 150                 | 150                 | 150                 | 150                 | 150                 | 150                            | 150                            | 150                            | 150                            |

---

Robust standard errors in brackets  
\*\*\* p<0.01, \*\* p<0.05, \* p<0.1

*With both the public health grant and healthcare as the expenditure variables: forward selection*

The use of backward selection to identify relevant covariates when theory provides little guidance does not always meet with universal approval, and hence we also report results using forward selection (see table A5 for the second-stage and table A6 for the first-stage results). Column 1 of table A5 shows the result with the inclusion of the most significant single control ('permanently sick') with the same five instruments from the 'full' specification in table A3. The Hansen-Sargan test statistic suggests that the instrument set is not valid and, in response to this, we re-estimate without the two insignificant MFF instruments. This re-estimation (see column 2 of table A5) largely resolves the instrument validity issue. Further re-estimation, with the inclusion of additional significant controls, generates the results shown in columns 3, 4 and 5. No further additional significant controls could be found and, as the result in column 5 is both in line with both our theoretical priors and passes the appropriate statistical tests, this is our preferred specification using forward selection.

Table A5 Derivation of preferred specification for public health expenditure with healthcare expenditure, forward selection, 2013/14

|                                                               | (1)                                                                                                                                                                                   | (2)                                                                                                                                                                                    | (3)                                                                                                                                                                                    | (4)                                                                                                                                                                                    | (5)                                                                                                                                                                                    |
|---------------------------------------------------------------|---------------------------------------------------------------------------------------------------------------------------------------------------------------------------------------|----------------------------------------------------------------------------------------------------------------------------------------------------------------------------------------|----------------------------------------------------------------------------------------------------------------------------------------------------------------------------------------|----------------------------------------------------------------------------------------------------------------------------------------------------------------------------------------|----------------------------------------------------------------------------------------------------------------------------------------------------------------------------------------|
|                                                               | All causes<br>2013/14 PH & PB spend<br>SYLLR 2013/14/15<br>outcome model<br>instrument PH&PB spend<br>weighted<br>IV second stage<br>forward selection<br>round 1<br>five instruments | All causes<br>2013/14 PH & PB spend<br>SYLLR 2013/14/15<br>outcome model<br>instrument PH&PB spend<br>weighted<br>IV second stage<br>forward selection<br>round 1<br>three instruments | All causes<br>2013/14 PH & PB spend<br>SYLLR 2013/14/15<br>outcome model<br>instrument PH&PB spend<br>weighted<br>IV second stage<br>forward selection<br>round 2<br>three instruments | All causes<br>2013/14 PH & PB spend<br>SYLLR 2013/14/15<br>outcome model<br>instrument PH&PB spend<br>weighted<br>IV second stage<br>forward selection<br>round 3<br>three instruments | All causes<br>2013/14 PH & PB spend<br>SYLLR 2013/14/15<br>outcome model<br>instrument PH&PB spend<br>weighted<br>IV second stage<br>forward selection<br>round 4<br>three instruments |
| Public health spend per person, 2013/14                       | -0.006<br>[0.025]                                                                                                                                                                     | -0.004<br>[0.028]                                                                                                                                                                      | -0.128***<br>[0.040]                                                                                                                                                                   | -0.107***<br>[0.041]                                                                                                                                                                   | -0.144***<br>[0.040]                                                                                                                                                                   |
| Healthcare spend per person, 2013/14                          | -1.012***<br>[0.244]                                                                                                                                                                  | -1.394***<br>[0.266]                                                                                                                                                                   | -0.949***<br>[0.238]                                                                                                                                                                   | -1.190***<br>[0.263]                                                                                                                                                                   | -0.837***<br>[0.269]                                                                                                                                                                   |
| Proportion of population aged 16-74 that are permanently sick | 0.554***<br>[0.031]                                                                                                                                                                   | 0.603***<br>[0.035]                                                                                                                                                                    | 0.697***<br>[0.046]                                                                                                                                                                    | 0.707***<br>[0.046]                                                                                                                                                                    | 0.601***<br>[0.051]                                                                                                                                                                    |
| Proportion of population providing unpaid care                |                                                                                                                                                                                       |                                                                                                                                                                                        | -0.289***<br>[0.081]                                                                                                                                                                   | -0.571***<br>[0.134]                                                                                                                                                                   | -0.547***<br>[0.122]                                                                                                                                                                   |
| Proportion of all residents born outside the EU               |                                                                                                                                                                                       |                                                                                                                                                                                        |                                                                                                                                                                                        | -0.059***<br>[0.021]                                                                                                                                                                   | -0.070***<br>[0.019]                                                                                                                                                                   |
| Proportion of those aged 16-74 that are long-term unemployed  |                                                                                                                                                                                       |                                                                                                                                                                                        |                                                                                                                                                                                        |                                                                                                                                                                                        | 0.156***<br>[0.040]                                                                                                                                                                    |
| Constant                                                      | 15.008***<br>[1.756]                                                                                                                                                                  | 17.848***<br>[1.913]                                                                                                                                                                   | 14.831***<br>[1.719]                                                                                                                                                                   | 15.692***<br>[1.742]                                                                                                                                                                   | 13.666***<br>[1.762]                                                                                                                                                                   |
| Observations                                                  | 150                                                                                                                                                                                   | 150                                                                                                                                                                                    | 150                                                                                                                                                                                    | 150                                                                                                                                                                                    | 150                                                                                                                                                                                    |
| Endogeneity test statistic                                    | 6.137                                                                                                                                                                                 | 17.111                                                                                                                                                                                 | 21.226                                                                                                                                                                                 | 20.194                                                                                                                                                                                 | 22.853                                                                                                                                                                                 |
| Endogeneity p-value                                           | 0.046                                                                                                                                                                                 | 0.000                                                                                                                                                                                  | 0.000                                                                                                                                                                                  | 0.000                                                                                                                                                                                  | 0.000                                                                                                                                                                                  |
| Hansen-Sargan test statistic                                  | 23.780                                                                                                                                                                                | 2.997                                                                                                                                                                                  | 0.032                                                                                                                                                                                  | 1.702                                                                                                                                                                                  | 1.465                                                                                                                                                                                  |
| Hansen-Sargan p-value                                         | 0.000                                                                                                                                                                                 | 0.083                                                                                                                                                                                  | 0.857                                                                                                                                                                                  | 0.192                                                                                                                                                                                  | 0.226                                                                                                                                                                                  |
| Kleibergen-Paap LM test statistic                             | 24.002                                                                                                                                                                                | 19.635                                                                                                                                                                                 | 19.756                                                                                                                                                                                 | 17.814                                                                                                                                                                                 | 18.331                                                                                                                                                                                 |
| Kleibergen-Paap p-value                                       | 0.000                                                                                                                                                                                 | 0.000                                                                                                                                                                                  | 0.000                                                                                                                                                                                  | 0.000                                                                                                                                                                                  | 0.000                                                                                                                                                                                  |
| Kleibergen-Paap F statistic                                   | 7.220                                                                                                                                                                                 | 10.806                                                                                                                                                                                 | 12.647                                                                                                                                                                                 | 11.051                                                                                                                                                                                 | 11.627                                                                                                                                                                                 |
| Pesaran-Taylor reset statistic                                | 0.073                                                                                                                                                                                 | 0.054                                                                                                                                                                                  | 0.069                                                                                                                                                                                  | 0.005                                                                                                                                                                                  | 0.466                                                                                                                                                                                  |
| Pesaran-Taylor p-value                                        | 0.788                                                                                                                                                                                 | 0.816                                                                                                                                                                                  | 0.793                                                                                                                                                                                  | 0.946                                                                                                                                                                                  | 0.495                                                                                                                                                                                  |



---

|                                                      |         |         |        |        |        |
|------------------------------------------------------|---------|---------|--------|--------|--------|
| Sanderdson-Windmejer Public health spend F-statistic | 100.608 | 183.202 | 76.326 | 66.169 | 57.002 |
| Sanderdson-Windmejer Public health spend p-value     | 0.000   | 0.000   | 0.000  | 0.000  | 0.000  |
| Sanderdson-Windmejer Healthcare spend F-statistic    | 9.052   | 16.288  | 19.070 | 16.633 | 17.375 |
| Sanderdson-Windmejer Healthcare spend p-value        | 0.000   | 0.000   | 0.000  | 0.000  | 0.000  |

---

Robust standard errors in brackets

\*\*\* p<0.01, \*\* p<0.05, \* p<0.1

Table A6 First-stage regression results for derivation of preferred specification for public health expenditure with healthcare expenditure, forward selection, 2013/14

|                                                   | (1)                                                                                                                                   | (2)                                                                                                                                   | (3)                                                                                                                                   | (4)                                                                                                                                   | (5)                                                                                                                                   | (6)                                                                                                                                   | (7)                                                                                                                                   | (8)                                                                                                                                   | (9)                                                                                                                                   | (10)                                                                                                                                  |
|---------------------------------------------------|---------------------------------------------------------------------------------------------------------------------------------------|---------------------------------------------------------------------------------------------------------------------------------------|---------------------------------------------------------------------------------------------------------------------------------------|---------------------------------------------------------------------------------------------------------------------------------------|---------------------------------------------------------------------------------------------------------------------------------------|---------------------------------------------------------------------------------------------------------------------------------------|---------------------------------------------------------------------------------------------------------------------------------------|---------------------------------------------------------------------------------------------------------------------------------------|---------------------------------------------------------------------------------------------------------------------------------------|---------------------------------------------------------------------------------------------------------------------------------------|
|                                                   | All causes<br>2013/14 PH spend<br>SYLLR 2013/14/15<br>outcome model<br>first-stage<br>weighted<br>OLS<br>forward selection<br>round 1 | All causes<br>2013/14 PB spend<br>SYLLR 2013/14/15<br>outcome model<br>first-stage<br>weighted<br>OLS<br>forward selection<br>round 1 | All causes<br>2013/14 PH spend<br>SYLLR 2013/14/15<br>outcome model<br>first-stage<br>weighted<br>OLS<br>forward selection<br>round 1 | All causes<br>2013/14 PB spend<br>SYLLR 2013/14/15<br>outcome model<br>first-stage<br>weighted<br>OLS<br>forward selection<br>round 1 | All causes<br>2013/14 PH spend<br>SYLLR 2013/14/15<br>outcome model<br>first-stage<br>weighted<br>OLS<br>forward selection<br>round 2 | All causes<br>2013/14 PB spend<br>SYLLR 2013/14/15<br>outcome model<br>first-stage<br>weighted<br>OLS<br>forward selection<br>round 2 | All causes<br>2013/14 PH spend<br>SYLLR 2013/14/15<br>outcome model<br>first-stage<br>weighted<br>OLS<br>forward selection<br>round 3 | All causes<br>2013/14 PB spend<br>SYLLR 2013/14/15<br>outcome model<br>first-stage<br>weighted<br>OLS<br>forward selection<br>round 3 | All causes<br>2013/14 PH spend<br>SYLLR 2013/14/15<br>outcome model<br>first-stage<br>weighted<br>OLS<br>forward selection<br>round 4 | All causes<br>2013/14 PB spend<br>SYLLR 2013/14/15<br>outcome model<br>first-stage<br>weighted<br>OLS<br>forward selection<br>round 4 |
| VARIABLES                                         | five instruments                                                                                                                      | five instruments                                                                                                                      | three instruments                                                                                                                     | three instruments                                                                                                                     | three instruments                                                                                                                     | three instruments                                                                                                                     | three instruments                                                                                                                     | three instruments                                                                                                                     | three instruments                                                                                                                     | three instruments                                                                                                                     |
| DFT index_Public health_1314                      | 0.729***<br>[0.055]                                                                                                                   | 0.025<br>[0.026]                                                                                                                      | 0.728***<br>[0.056]                                                                                                                   | 0.026<br>[0.026]                                                                                                                      | 0.725***<br>[0.058]                                                                                                                   | 0.024<br>[0.025]                                                                                                                      | 0.723***<br>[0.061]                                                                                                                   | 0.009<br>[0.025]                                                                                                                      | 0.715***<br>[0.059]                                                                                                                   | 0.007<br>[0.026]                                                                                                                      |
| MFF Index_Public health_1314                      | 0.832<br>[1.006]                                                                                                                      | 0.550<br>[0.416]                                                                                                                      |                                                                                                                                       |                                                                                                                                       |                                                                                                                                       |                                                                                                                                       |                                                                                                                                       |                                                                                                                                       |                                                                                                                                       |                                                                                                                                       |
| Healthcare_DFT_index                              | 0.633**<br>[0.291]                                                                                                                    | 0.579***<br>[0.127]                                                                                                                   | 0.504*<br>[0.272]                                                                                                                     | 0.552***<br>[0.116]                                                                                                                   | 0.373<br>[0.279]                                                                                                                      | 0.457***<br>[0.119]                                                                                                                   | 0.383<br>[0.277]                                                                                                                      | 0.526***<br>[0.114]                                                                                                                   | 0.447<br>[0.285]                                                                                                                      | 0.542***<br>[0.115]                                                                                                                   |
| Prescribing_Age_index                             | -1.591***<br>[0.146]                                                                                                                  | 0.143**<br>[0.059]                                                                                                                    | -1.530***<br>[0.095]                                                                                                                  | 0.147***<br>[0.039]                                                                                                                   | -1.326***<br>[0.199]                                                                                                                  | 0.296***<br>[0.068]                                                                                                                   | -1.338***<br>[0.228]                                                                                                                  | 0.206***<br>[0.067]                                                                                                                   | -1.263***<br>[0.235]                                                                                                                  | 0.225***<br>[0.070]                                                                                                                   |
| HCHS_MFF_index                                    | -1.335<br>[1.119]                                                                                                                     | -0.729<br>[0.450]                                                                                                                     |                                                                                                                                       |                                                                                                                                       |                                                                                                                                       |                                                                                                                                       |                                                                                                                                       |                                                                                                                                       |                                                                                                                                       |                                                                                                                                       |
| Proportion of 16-74 that are permanently sick     | 0.639***<br>[0.049]                                                                                                                   | 0.065***<br>[0.018]                                                                                                                   | 0.673***<br>[0.030]                                                                                                                   | 0.073***<br>[0.012]                                                                                                                   | 0.711***<br>[0.042]                                                                                                                   | 0.101***<br>[0.016]                                                                                                                   | 0.710***<br>[0.044]                                                                                                                   | 0.094***<br>[0.015]                                                                                                                   | 0.654***<br>[0.054]                                                                                                                   | 0.080***<br>[0.022]                                                                                                                   |
| Proportion of population providing unpaid care    |                                                                                                                                       |                                                                                                                                       |                                                                                                                                       |                                                                                                                                       | -0.260<br>[0.193]                                                                                                                     | -0.189***<br>[0.067]                                                                                                                  | -0.268<br>[0.193]                                                                                                                     | -0.250***<br>[0.069]                                                                                                                  | -0.304<br>[0.193]                                                                                                                     | -0.259***<br>[0.071]                                                                                                                  |
| Proportion of all residents born outside the EU   |                                                                                                                                       |                                                                                                                                       |                                                                                                                                       |                                                                                                                                       |                                                                                                                                       |                                                                                                                                       | -0.004<br>[0.026]                                                                                                                     | -0.030***<br>[0.010]                                                                                                                  | -0.016<br>[0.027]                                                                                                                     | -0.033***<br>[0.011]                                                                                                                  |
| Proportion of 16-74 that are long-term unemployed |                                                                                                                                       |                                                                                                                                       |                                                                                                                                       |                                                                                                                                       |                                                                                                                                       |                                                                                                                                       |                                                                                                                                       |                                                                                                                                       | 0.091<br>[0.058]                                                                                                                      | 0.023<br>[0.028]                                                                                                                      |
| Constant                                          | 5.844***<br>[0.157]                                                                                                                   | 7.257***<br>[0.057]                                                                                                                   | 5.958***<br>[0.096]                                                                                                                   | 7.286***<br>[0.040]                                                                                                                   | 5.490***<br>[0.357]                                                                                                                   | 6.945***<br>[0.125]                                                                                                                   | 5.458***<br>[0.388]                                                                                                                   | 6.708***<br>[0.146]                                                                                                                   | 5.534***<br>[0.395]                                                                                                                   | 6.727***<br>[0.144]                                                                                                                   |
| Observations                                      | 150                                                                                                                                   | 150                                                                                                                                   | 150                                                                                                                                   | 150                                                                                                                                   | 150                                                                                                                                   | 150                                                                                                                                   | 150                                                                                                                                   | 150                                                                                                                                   | 150                                                                                                                                   | 150                                                                                                                                   |

Robust standard errors in brackets

\*\*\* p&lt;0.01, \*\* p&lt;0.05, \* p&lt;0.1

## References for appendices

1. NHS England (2015). 2013-14 CCG Programme Budgeting Benchmarking Tool. Available from <https://www.england.nhs.uk/prog-budgeting/> [accessed 22 July, 2020].
2. DH (2018). Personal communication, 07 November.
3. Andrews, M., Elamin, O, Hall, A. R., Kyriakoulis, K. and M Sutton (2017). Inference in the presence of redundant moment conditions and the impact of government health expenditure on health outcomes in England. *Econometric Reviews*, 36(1–3), pp.23–41. Available from <https://www.tandfonline.com/doi/full/10.1080/07474938.2016.1114205> [accessed 22 July, 2020].
4. Small, D.S. (2007). Sensitivity analysis for instrumental variables regression with overidentifying restrictions. *Journal of the American Statistical Association* **102**(479), 1049-1058.
